# Twelve new species of *Cyrtodactylus* Gray (Squamata: Gekkonidae) from isolated limestone habitats in east-central and southern Myanmar demonstrate high localized diversity and unprecedented microendemism

L. LEE GRISMER<sup>1\*</sup>, PERRY L. WOOD, JR.<sup>2</sup>, MYINT KYAW THURA<sup>3</sup>, THAW ZIN<sup>3</sup>, EVAN S. H. QUAH<sup>4</sup>, MATTHEW L. MURDOCH<sup>1</sup>, MARTA S. GRISMER<sup>1</sup>, AUNG LIN<sup>5</sup>, HTET KYAW<sup>5</sup> and NGWE LWIN<sup>5</sup>

<sup>1</sup>Herpetology Laboratory, Department of Biology, La Sierra University, 4500 Riverwalk Parkway, Riverside, CA 92515, USA

<sup>2</sup>Department of Biology, Brigham Young University, 150 East Bulldog Boulevard, Provo, UT 84602, USA

<sup>3</sup>Myanmar Environment Sustainable Conservation, Yangon, Myanmar

<sup>4</sup>School of Biological Sciences, Universiti Sains Malaysia, 11800 USM, Pulau Pinang, Penang, Malaysia

<sup>5</sup>Fauna and Flora International, No(35), 3rd Floor, Shan Gone Condo, Myay Ni Gone Market Street, Sanchaung Township, Yangon, Myanmar

Received 22 January 2017; revised 8 July 2017; accepted for publication 31 July 2017

Twelve new karst-adapted species of the gekkonid genus *Cyrtodactylus* Gray are described from the Shan Hills and Salween River Basin of Myanmar. Three species occur in rocky habitats along karst ridges and nine species are micro-endemics restricted to isolated karst caves and towers. This high, localized diversity underscores the archipelago-like nature and microendemism associated with karst habitat-islands. Eleven of the 12 new species are not related to other Indo-Burmese species and form four monophyletic species groups nested within a larger Indo-Chinese clade of Southeast Asian species. Phylogenetic relationships and distributions indicate *Cyrtodactylus* originated in the Himalayan uplands and dispersed westward through Myanmar with subsequent invasions back into eastern and southern Myanmar. These new species highlight the understudied nature of karst biodiversity in general and karst herpetology in particular. Extensive karst ecosystems throughout the massive Shan Plateau of eastern Myanmar remain largely unexplored and are likely to harbour tens—if not hundreds—of undiscovered species. The unique and complex structure of understudied limestone ecosystems throughout Southeast Asia are habitats in which amphibians and reptiles have specialized, speciated and become endemic. In an age of biodiversity crisis, managing and conserving these ecosystems throughout Southeast Asia should be given greater priority. A key to the species of *Cyrtodactylus* of Myanmar is provided.

**ADDITIONAL KEYWORDS:** biogeography – conservation – *Cyrtodactylus* – Indo-China – karst ecosystems – key – Myanmar – new species – Shan Hills – systematics.

## INTRODUCTION

The gekkonid genus *Cyrtodactylus* Gray is by far the most diverse gekkotan lineage and, as has been repeatedly noted elsewhere, the rate at which new

species are being described shows no sign of abating. Most species of *Cyrtodactylus* occupy habitats with an abundance of rocky substrates and many species have independently evolved varying combinations of suites of characteristics that are adaptive for living exclusively on rocks—either granite or limestone—and locomoting in all planes of orientation (Grismer *et al.*, 2015b, 2016a; Grismer & Grismer, 2017). Although *Cyrtodactylus* ranges from Pakistan to the

\*Corresponding author. E-mail: [lgrismer@lasierra.edu](mailto:lgrismer@lasierra.edu)  
[Version of Record, published online 21 October 2017; <http://zoobank.org/urn:lsid:zoobank.org:pub:766A1D88-096C-46DE-B360-C58457736668>]

western Pacific, the bulk of the newly discovered species come from limestone (karst) habitats in Laos, Vietnam, Thailand and Peninsular Malaysia (37 species from 2010 to 2016; see Uetz, Freed & Hosek, 2016). Throughout the Thai-Malay Peninsula in particular, surveys have demonstrated that the ecological and physical complexity of limestone ecosystems can harbour a suite of syntopic, microendemic amphibians and reptiles that are often restricted to a single limestone cave, ridge or karst tower (Grismer *et al.*, 2016a, b and references therein). These distinctive, insular micro-ecosystems provide unique combinations of ecological features—vertical to inverted substrates, climatic stability, low illumination, relaxed predation, reduced prey base—not found in the surrounding forested areas and can promote and drive ecological speciation (Schluter, 2001; Rundle & Nosil, 2005; Nosil, 2012). Thus, the potential for the discovery of new species in these understudied ecosystems cannot be overstated. In Peninsular Malaysia alone, 16 new species of reptiles from only 13 different limestone formations have been described in the last eight years (see Grismer *et al.*, 2016b and references therein), leaving 558 formations in that region (Price, 2014) yet to be surveyed. Therefore, by extension, this would suggest that the vast, unexplored limestone regions of other Southeast Asian nations should harbour untold numbers of new endemic species.

Despite the increasing annual rates at which new species of *Cyrtodactylus* are being described from Southeast Asia, only two new species (Connette *et al.*, 2017) from Myanmar have been added since the nine species described by Bauer (2002, 2003) and the single

species described by Mahony (2009)—which is particularly ironic given the extensive nature of limestone habitats throughout the eastern and southern sections of this country. Of the nine species described by Bauer (2002, 2003), it is difficult to say if any (with the exception of perhaps *C. chrysopylos* Bauer from the Pyadalin Cave) are confined to limestone habitats as no natural history information accompanied their descriptions. Wood *et al.* (2012) demonstrated that seven of these nine Burmese species and two others from western Myanmar formed a monophyletic group.

At the invitation of the Forestry Department of Myanmar and Fauna and Flora International, we were given reasonably unrestricted access into some of the limestone regions in the lowland areas of the Salween River Basin in the southern states of Mon and Kayin and upland areas along the western edge of the Shan Hills in Mandalay Region and Shan State in east-central Myanmar (Figs 1, 2). During this short survey period from 3 to 18 October 2016, we visited 19 different limestone habitats (caves, karst towers, hills) and discovered 12 new species of *Cyrtodactylus*, three new species of *Hemiphyllodactylus* Bleeker (Grismer *et al.*, 2017) and two new species of *Hemidactylus* Oken (L. L. Grismer *et al.*, in prep). Inferences using molecular data from 1505 base pairs (bp) of the mitochondrial gene NADH dehydrogenase subunit 2 (*ND2*) and its flanking tRNA regions indicate that 11 of the 12 new species of *Cyrtodactylus* are not closely related to any of the Indo-Burmese species of Agarwal *et al.* (2014) that range west of the Shan Hills nor do they form an exclusive, monophyletic group with each other. They do however form a clade with other Indo-Chinese species from Thailand, Cambodia and Vietnam exclusive

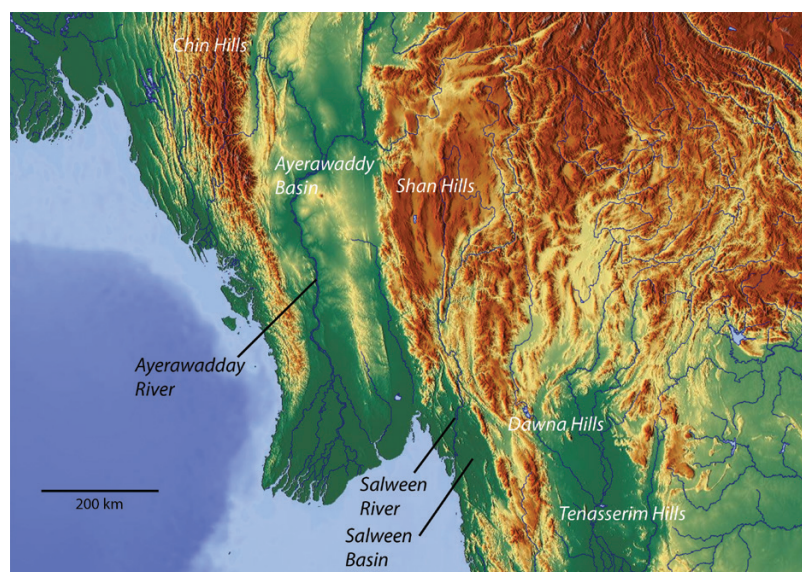

**Figure 1.** Major geographic features of Myanmar referred to herein.

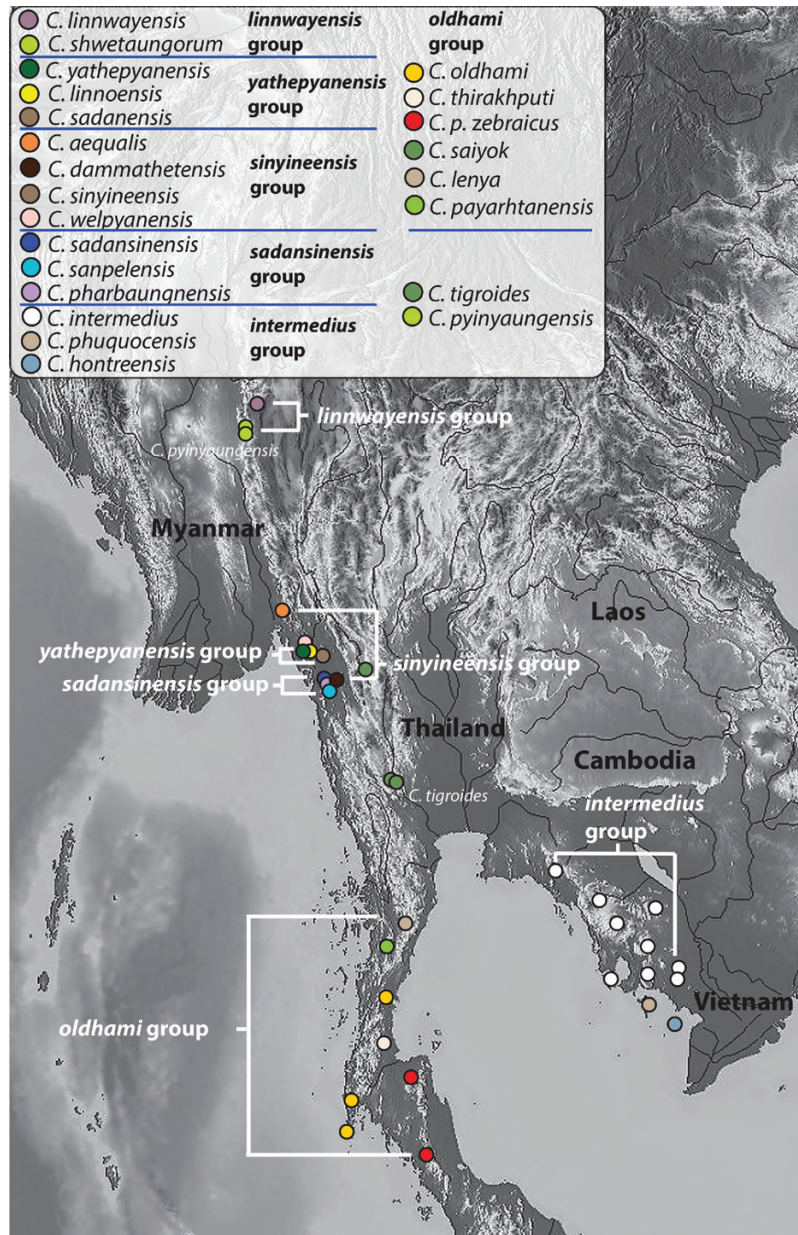

**Figure 2.** Distribution of the species in the species groups of the Indo-Chinese clade.

of other Southeast Asian taxa. The single remaining new species from near Pyinyaung Village, Mandalay Region forms a monophyletic group with *C. annandalei* Bauer and another new species from Popa Mountain, Mandalay Region that was misidentified in Wood *et al.* (2012) and Agarwal *et al.* (2014) as *C. feae* Boulenger (G. R. Zug, unpubl. data). In this paper, we describe the 12 new species of *Cyrtodactylus*, outline their phylogenetic relationships to each other and other Southeast Asian species, provide a preliminary scenario of their origin and biogeographic history, and provide a key to the species of *Cyrtodactylus* of Myanmar.

## MATERIAL AND METHODS

### TAXON SAMPLING AND OUTGROUP SELECTION

The primary aim of this study was to investigate the taxonomy and phylogenetic relationships of the newly discovered species of *Cyrtodactylus* from the Shan Hills and Salween River Basin based on 1548 bp of *ND2* and its flanking tRNAs (WANCY). The data set of Agarwal *et al.* (2014), which included exemplars of all the major *Cyrtodactylus* clades in Wood *et al.* (2012), was augmented with 90 samples from Myanmar and ten samples from western and Peninsular Thailand, totalling

169 samples. *Hemidactylus angulatus* Hallowell, *H. frenatus* Duméril & Bibron, *H. garnotii* Duméril & Bibron, *H. mabouia* (Moreau de Jonnes) and *H. turcicus* (Linnaeus) served as outgroups based on the phylogeny of Wood *et al.* (2012). All new sequences were deposited in GenBank (Table 1).

#### MOLECULAR DATA

Genomic DNA was isolated from liver or skeletal muscle specimens stored in 95% ethanol using the Qiagen DNeasy tissue kit (Valencia, CA, USA). *ND2* was amplified using a double-stranded polymerase chain reaction (PCR) under the following conditions: 1.0 µL genomic DNA (10–30 µg), 1.0 µL light strand primer (concentration 10 µM), 1.0 µL heavy strand primer (concentration 10 µM), 1.0 µL dinucleotide pairs (1.5 µM), 2.0 µL 5× buffer (1.5 µM), MgCl 10× buffer (1.5 µM), 0.1 µL Taq polymerase (5 U/µL) and 6.4 µL ultra-pure H<sub>2</sub>O. PCR reactions were executed on an Eppendorf Mastercycler gradient thermocycler under the following conditions: initial denaturation at 95 °C for 2 min, followed by a second denaturation at 95 °C for 35 s, annealing at 48–50 °C for 35 s, followed by a cycle extension at 72 °C for 35 s, for 31 cycles. All PCR products were visualized on a 1.0% agarose gel electrophoresis. Successful PCR products were vacuum purified using MANU 30 PCR plates (Millipore) and purified products were resuspended in ultra-pure water. Purified PCR products were sequenced using the ABI Big-Dye Terminator v3.1 Cycle Sequencing Kit in an ABI GeneAmp PCR 9700 thermal cycler. Cycle sequencing reactions were purified with Sephadex G-50 Fine (GE Healthcare) and sequenced on an ABI 3730xl DNA Analyzer at the BYU (Brigham Young University) DNA Sequencing Centre (DNASC). Primers used for amplification and sequencing are presented in Table 2. Sequences were analysed from both the 3' and the 5' ends separately to confirm congruence between the reads. Both the forward, reverse and the two internal sequences were uploaded and edited in Geneious version v6.1.8 (Kearse *et al.*, 2012) and were edited therein. The protein-coding region of the *ND2* sequence was aligned by eye. Mesquite v3.04 (Maddison & Maddison, 2015) was used to calculate the correct amino acid reading frame and to confirm the lack of premature stop codons. Uncorrected pairwise sequence divergences were calculated in MEGA7.0 (Kumar, Stecher & Tamura, 2016).

Three different phylogenetic analyses were employed. A maximum likelihood (ML) analysis was implemented in IQ-TREE (Nguyen *et al.*, 2015) and using Bayesian Information Criterion (BIC), calculated K3P+I+G4 to be the best-fit model of evolution for the tRNA and TVM+I+G4 for the first codon position and TIM3+G4 for the second and third codon

positions. One thousand bootstrap pseudoreplicates via the ultra-fast bootstrap approximation algorithm were employed and nodes having ML UFboot values (UF) of 95 and above were considered significantly supported (Minh, Nguyen & von Haeseler, 2013). A Bayesian analysis was carried out in MrBayes 3.2.3. on XSEDE (Ronquist *et al.*, 2012) using CIPRES (Cyberinfrastructure for Phylogenetic Research; Miller, Pfeiffer & Schwartz, 2010) employing default priors and the partitioning scheme and models of evolution most closely approximating those used in the ML analysis. Two simultaneous runs were performed with four chains, three hot and one cold. The simulation ran for 70 000 000 generations, was sampled every 70 000 generations using the Markov Chain Monte Carlo (MCMC) and the first 25% of each run was discarded as burn-in. Stationarity and .p files from each run were checked in Tracer v1.6 to ensure effective sample sizes (ESS) were above 200 for all parameters (Rambaut *et al.*, 2014). Nodes with Bayesian posterior probabilities (BPP) of 0.95 and above were considered well-supported (Huelsenbeck *et al.*, 2001; Wilcox *et al.*, 2002). A time-calibrated Bayesian inference analysis was implemented in BEAUti version 1.8.0 (Bayesian Evolutionary Analysis Utility) and run on BEAST version 1.8.0 (Bayesian Evolutionary Analysis Sampling Trees; Drummond *et al.*, 2012) employing an uncorrelated lognormal relaxed clock with unlinked substitution and clock models and monophyly unchecked for taxon sets. A GTR+Gamma substitution model was selected for each codon position. MCMC chains were run using Coalescent tree priors for 200 million generations and logged every 20 000 generations. It has been demonstrated that the third codon position is susceptible to substitution saturation (Zamudio, Jones & Ward, 1997; Carranza *et al.*, 2000; Brandley *et al.*, 2011; Grismer *et al.*, 2015a) and could contribute to overestimating node ages. However, Grismer *et al.* (2015a) noted that although third codon position saturation was evident in their study of the gekkonid *Hemiphyllodactylus*, it was not a significant factor in estimating node ages across various codon and gene partition schemes and was consistent with similar node age estimates using nuclear genes on the same taxa (Heinicke *et al.*, 2011). Fossil calibrations from Agarwal *et al.* (2014) on essentially the same data set used herein, placed a mean date of 31.4 millions of years (95% HPD 36.2–27.2 Myr; Agarwal *et al.*, 2017) on the node between the *Cyrtodactylus pulchellus* complex and the remaining Southeast Asian taxa containing the *intermedius* group and this was used herein as a constraint prior to date the same node with a standard deviation (SD) of 1.5%. Maximum clade credibility trees using mean heights at the nodes were generated using TreeAnnotator v.1.8.0 (Rambaut & Drummond, 2013) with a burn-in of 1000 trees. The BEAST log files

**Table 1.** GenBank accession numbers for the newly recorded specimens used for the molecular phylogenetic analyses

| Taxon                             | Catalogue no. | Locality                                                                                                                             | GenBank no. |
|-----------------------------------|---------------|--------------------------------------------------------------------------------------------------------------------------------------|-------------|
| <i>Cyrtodactylus aequalis</i>     | LSUHC 12895   | Kyaiktiyo Hill, Mon State, Myanmar (N17°28.819, E97°05.974)                                                                          | MF872275    |
| <i>C. dammathetensis</i> sp. nov. | LSUHC 12862   | Dammathet Cave 19.8 km east of Mawlamyine, Mawlamyine District, Mon State, Myanmar (N16°30.380, E97°48.629)                          | MF872276    |
| <i>C. dammathetensis</i> sp. nov. | LSUHC 12863   | Dammathet Cave 19.8 km east of Mawlamyine, Mawlamyine District, Mon State, Myanmar (N16°30.380, E97°48.629)                          | MF872277    |
| <i>C. dammathetensis</i> sp. nov. | LSUHC 12864   | Dammathet Cave 19.8 km east of Mawlamyine, Mawlamyine District, Mon State, Myanmar (N16°30.380, E97°48.629)                          | MF872278    |
| <i>C. linnwayensis</i> sp. nov.   | BYU 52213     | Lay Htuck Cave, Linn-Way Village, 12.7 km north-east of Ywangan, Taunggyi District, Shan State, Myanmar (N21°12.964, E96°33.288)     | MF872279    |
| <i>C. linnwayensis</i> sp. nov.   | BYU 52214     | Yum Twing Gyi Cave, Linn-Way Village, 12.7 km north-east of Ywangan, Taunggyi District, Shan State, Myanmar (N21°12.964, E96°33.288) | MF872280    |
| <i>C. linnwayensis</i> sp. nov.   | LSUHC 12970   | Yae Htuck Cave, Linn-Way Village, 13.3 km north-east of Ywangan, Taunggyi District, Shan State, Myanmar (N21°13.675, E96°33.403)     | MF872281    |
| <i>C. linnwayensis</i> sp. nov.   | LSUHC 12971   | Yae Htuck Cave, Linn-Way Village, 13.3 km north-east of Ywangan, Taunggyi District, Shan State, Myanmar (N21°13.675, E96°33.403)     | MF872282    |
| <i>C. linnwayensis</i> sp. nov.   | LSUHC 12972   | Yae Htuck Cave, Linn-Way Village, 13.3 km north-east of Ywangan, Taunggyi District, Shan State, Myanmar (N21°13.675, E96°33.403)     | MF872283    |
| <i>C. linnwayensis</i> sp. nov.   | LSUHC 12973   | Yae Htuck Cave, Linn-Way Village, 13.3 km north-east of Ywangan, Taunggyi District, Shan State, Myanmar (N21°13.675, E96°33.403)     | MF872284    |
| <i>C. linnwayensis</i> sp. nov.   | LSUHC 12980   | Lay Htuck Cave, Linn-Way Village, 12.7 km north-east of Ywangan, Taunggyi District, Shan State, Myanmar (N21°12.964, E96°33.288)     | MF872285    |
| <i>C. linnwayensis</i> sp. nov.   | LSUHC 12981   | Lay Htuck Cave, Linn-Way Village, 12.7 km north-east of Ywangan, Taunggyi District, Shan State, Myanmar (N21°12.964, E96°33.288)     | MF872286    |
| <i>C. linnwayensis</i> sp. nov.   | LSUHC 12983   | Yum Twing Gyi Cave, Linn-Way Village, 12.7 km north-east of Ywangan, Taunggyi District, Shan State, Myanmar (N21°12.964, E96°33.288) | MF872287    |
| <i>C. linnwayensis</i> sp. nov.   | LSUHC 12984   | Yum Twing Gyi Cave, Linn-Way Village, 12.7 km north-east of Ywangan, Taunggyi District, Shan State, Myanmar (N21°12.964, E96°33.288) | MF872288    |
| <i>C. linnwayensis</i> sp. nov.   | LSUHC 12986   | Yum Twing Gyi Cave, Linn-Way Village, 12.7 km north-east of Ywangan, Taunggyi District, Shan State, Myanmar (N21°12.964, E96°33.288) | MF872289    |
| <i>C. linnoensis</i> sp. nov.     | BYU 52230     | Linno Cave region 5 km south-west of Hpa-an, Hpa-an District, Kayin State, Myanmar (N16°50.551, E97°36.402)                          | MF872290    |
| <i>C. linnoensis</i> sp. nov.     | BYU 52231     | Linno Cave region 5 km south-west of Hpa-an, Hpa-an District, Kayin State, Myanmar (N16°50.551, E97°36.402)                          | MF872291    |
| <i>C. linnoensis</i> sp. nov.     | BYU 52232     | Linno Cave region 5 km south-west of Hpa-an, Hpa-an District, Kayin State, Myanmar (N16°50.551, E97°36.402)                          | MF872292    |
| <i>C. linnoensis</i> sp. nov.     | BYU 52233     | Linno Cave region 5 km south-west of Hpa-an, Hpa-an District, Kayin State, Myanmar (N16°50.551, E97°36.402)                          | MF872293    |
| <i>C. linnoensis</i> sp. nov.     | LSUHC 12824   | Linno Cave region 5 km south-west of Hpa-an, Hpa-an District, Kayin State, Myanmar (N16°50.551, E97°36.402)                          | MF872294    |

Table 1. *Continued*

| Taxon                             | Catalogue no.            | Locality                                                                                                             | GenBank no. |
|-----------------------------------|--------------------------|----------------------------------------------------------------------------------------------------------------------|-------------|
| <i>C. linnoensis</i> sp. nov.     | LSUHC 12825              | Linno Cave region 5 km south-west of Hpa-an, Hpa-an District, Kayin State, Myanmar (N16°50.551, E97°36.402)          | MF872295    |
| <i>C. linnoensis</i> sp. nov.     | LSUHC 12826              | Linno Cave region 5 km south-west of Hpa-an, Hpa-an District, Kayin State, Myanmar (N16°50.551, E97°36.402)          | MF872296    |
| <i>C. linnoensis</i> sp. nov.     | LSUHC 12829              | Linno Cave region 5 km south-west of Hpa-an, Hpa-an District, Kayin State, Myanmar (N16°50.551, E97°36.402)          | MF872297    |
| <i>C. linnoensis</i> sp. nov.     | LSUHC 12832              | Linno Cave region 5 km south-west of Hpa-an, Hpa-an District, Kayin State, Myanmar (N16°50.551, E97°36.402)          | MF872298    |
| <i>C. linnoensis</i> sp. nov.     | LSUHC 12833              | Linno Cave region 5 km south-west of Hpa-an, Hpa-an District, Kayin State, Myanmar (N16°50.551, E97°36.402)          | MF872299    |
| <i>C. linnoensis</i> sp. nov.     | LSUHC 12834              | Linno Cave region 5 km south-west of Hpa-an, Hpa-an District, Kayin State, Myanmar (N16°50.551, E97°36.402)          | MF872300    |
| <i>C. oldhami</i>                 | MS 460                   | Kraburi District, Phang-nga Province, Thailand                                                                       | MF872301    |
| <i>C. oldhami</i>                 | MS 585                   | Muang District, Ranong Province, Thailand                                                                            | MF872302    |
| <i>C. cf. peguensis zebraicus</i> | CUMZ THA R2005<br>073054 | Tham Khao Lang, Petchaburi Province, Thailand                                                                        | GU550727.1  |
| <i>C. pharbaungensis</i> sp. nov. | BYU 52215                | Pharpoun Cave 38.4 km south-east of Mawlamyine, Mawlamyine District, Mon State, Myanmar (N16°17.118, E97°54.056)     | MF872303    |
| <i>C. pharbaungensis</i> sp. nov. | LSUHC 12870              | Pharpoun Cave 38.4 km south-east of Mawlamyine, Mawlamyine District, Mon State, Myanmar (N16°17.118, E97°54.056)     | MF872304    |
| <i>C. pharbaungensis</i> sp. nov. | LSUHC 12871              | Pharpoun Cave 38.4 km south-east of Mawlamyine, Mawlamyine District, Mon State, Myanmar (N16°17.118, E97°54.056)     | MF872305    |
| <i>C. pharbaungensis</i> sp. nov. | LSUHC 12873              | Pharpoun Cave 38.4 km south-east of Mawlamyine, Mawlamyine District, Mon State, Myanmar (N16°17.118, E97°54.056)     | MF872306    |
| <i>C. pyinyaungensis</i> sp. nov. | BYU 52234                | 5.3 km north of Pyinyaung Village at the Apache Cement factory mining site, Mandalay Region (N20°52.191, E96°24.296) | MF872307    |
| <i>C. saiyok</i>                  | MS 484                   | Sai Yok National Park, Kanchanaburi Province, Thailand                                                               | MF872308    |
| <i>C. saiyok</i>                  | MS 480                   | Suang Phung, Ratchaburi Province, Thailand                                                                           | MF872309    |
| <i>C. sadanensis</i> sp. nov.     | BYU 52216                | Sadan Cave 17 km south-east of Hpa-an, Hpa-an District, Kayin State, Myanmar (N16°44.605, E97°29.493)                | MF872310    |
| <i>C. sadanensis</i> sp. nov.     | BYU 52217                | Sadan Cave 17 km south-east of Hpa-an, Hpa-an District, Kayin State, Myanmar (N16°44.605, E97°29.493)                | MF872311    |
| <i>C. sadanensis</i> sp. nov.     | BYU 52218                | Sadan Cave 17 km south-east of Hpa-an, Hpa-an District, Kayin State, Myanmar (N16°44.605, E97°29.493)                | MF872312    |
| <i>C. sadanensis</i> sp. nov.     | BYU 52219                | Sadan Cave 17 km south-east of Hpa-an, Hpa-an District, Kayin State, Myanmar (N16°44.605, E97°29.493)                | MF872313    |
| <i>C. sadanensis</i> sp. nov.     | LSUHC 12841              | Sadan Cave 17 km south-east of Hpa-an, Hpa-an District, Kayin State, Myanmar (N16°44.605, E97°29.493)                | MF872314    |
| <i>C. sadanensis</i> sp. nov.     | LSUHC 12841              | Sadan Cave 17 km south-east of Hpa-an, Hpa-an District, Kayin State, Myanmar (N16°44.605, E97°29.493)                | MF872315    |
| <i>C. sadanensis</i> sp. nov.     | LSUHC 12842              | Sadan Cave 17 km south-east of Hpa-an, Hpa-an District, Kayin State, Myanmar (N16°44.605, E97°29.493)                | MF872316    |
| <i>C. sadanensis</i> sp. nov.     | LSUHC 12843              | Sadan Cave 17 km south-east of Hpa-an, Hpa-an District, Kayin State, Myanmar (N16°44.605, E97°29.493)                | MF872317    |
| <i>C. sadanensis</i> sp. nov.     | LSUHC 12844              | Sadan Cave 17 km south-east of Hpa-an, Hpa-an District, Kayin State, Myanmar (N16°44.605, E97°29.493)                | MF872318    |
| <i>C. sadanensis</i> sp. nov.     | LSUHC 12845              | Sadan Cave 17 km south-east of Hpa-an, Hpa-an District, Kayin State, Myanmar (N16°44.605, E97°29.493)                | MF872319    |

Table 1. *Continued*

| Taxon                            | Catalogue no. | Locality                                                                                                          | GenBank no. |
|----------------------------------|---------------|-------------------------------------------------------------------------------------------------------------------|-------------|
| <i>C. sadanensis</i> sp. nov.    | LSUHC 12846   | Sadan Cave 17 km south-east of Hpa-an, Hpa-an District, Kayin State, Myanmar (N16°44.605, E97°29.493)             | MF872320    |
| <i>C. sadanensis</i> sp. nov.    | LSUHC 12847   | Sadan Cave 17 km south-east of Hpa-an, Hpa-an District, Kayin State, Myanmar (N16°44.605, E97°29.493)             | MF872321    |
| <i>C. sadanensis</i> sp. nov.    | LSUHC 12848   | Sadan Cave 17 km south-east of Hpa-an, Hpa-an District, Kayin State, Myanmar (N16°44.605, E97°29.493)             | MF872322    |
| <i>C. sadanensis</i> sp. nov.    | LSUHC 12849   | Sadan Cave 17 km south-east of Hpa-an, Hpa-an District, Kayin State, Myanmar (N16°44.605, E97°29.493)             | MF872323    |
| <i>C. sadanensis</i> sp. nov.    | LSUHC 12853   | Sadan Cave 17 km south-east of Hpa-an, Hpa-an District, Kayin State, Myanmar (N16°44.605, E97°29.493)             | MF872324    |
| <i>C. sadansinensis</i> sp. nov. | BYU 52220     | Sadan Sin Cave 10.5 km north-west of Mawlamyine, Mawlamyine District, Mon State, Myanmar (N16°31.729, E97°43.056) | MF872325    |
| <i>C. sadansinensis</i> sp. nov. | LSUHC 12855   | Sadan Sin Cave 10.5 km north-west of Mawlamyine, Mawlamyine District, Mon State, Myanmar (N16°31.729, E97°43.056) | MF872326    |
| <i>C. sadansinensis</i> sp. nov. | LSUHC 12856   | Sadan Sin Cave 10.5 km north-west of Mawlamyine, Mawlamyine District, Mon State, Myanmar (N16°31.729, E97°43.056) | MF872327    |
| <i>C. sadansinensis</i> sp. nov. | LSUHC 12857   | Sadan Sin Cave 10.5 km north-west of Mawlamyine, Mawlamyine District, Mon State, Myanmar (N16°31.729, E97°43.056) | MF872328    |
| <i>C. sadansinensis</i> sp. nov. | LSUHC 12858   | Sadan Sin Cave 10.5 km north-west of Mawlamyine, Mawlamyine District, Mon State, Myanmar (N16°31.729, E97°43.056) | MF872329    |
| <i>C. sadansinensis</i> sp. nov. | LSUHC 12859   | Sadan Sin Cave 10.5 km north-west of Mawlamyine, Mawlamyine District, Mon State, Myanmar (N16°31.729, E97°43.056) | MF872330    |
| <i>C. sanpelensis</i> sp. nov.   | BYU 52221     | Sanpel Cave 21.3 km south-east of Mawlamyine, Mawlamyine District, Mon State, Myanmar (N16°22.427, E97°46.388)    | MF872331    |
| <i>C. sanpelensis</i> sp. nov.   | BYU 52222     | Sanpel Cave 21.3 km south-east of Mawlamyine, Mawlamyine District, Mon State, Myanmar (N16°22.427, E97°46.388)    | MF872332    |
| <i>C. sanpelensis</i> sp. nov.   | BYU 52223     | Sanpel Cave 21.3 km south-east of Mawlamyine, Mawlamyine District, Mon State, Myanmar (N16°22.427, E97°46.388)    | MF872333    |
| <i>C. sanpelensis</i> sp. nov.   | BYU 52224     | Sanpel Cave 21.3 km south-east of Mawlamyine, Mawlamyine District, Mon State, Myanmar (N16°22.427, E97°46.388)    | MF872334    |
| <i>C. sanpelensis</i> sp. nov.   | LSUHC 12875   | Sanpel Cave 21.3 km south-east of Mawlamyine, Mawlamyine District, Mon State, Myanmar (N16°22.427, E97°46.388)    | MF872336    |
| <i>C. sanpelensis</i> sp. nov.   | LSUHC 12877   | Sanpel Cave 21.3 km south-east of Mawlamyine, Mawlamyine District, Mon State, Myanmar (N16°22.427, E97°46.388)    | MF872337    |
| <i>C. sanpelensis</i> sp. nov.   | LSUHC 12877   | Sanpel Cave 21.3 km south-east of Mawlamyine, Mawlamyine District, Mon State, Myanmar (N16°22.427, E97°46.388)    | MF872335    |
| <i>C. sanpelensis</i> sp. nov.   | LSUHC 12878   | Sanpel Cave 21.3 km south-east of Mawlamyine, Mawlamyine District, Mon State, Myanmar (N16°22.427, E97°46.388)    | MF872338    |
| <i>C. sanpelensis</i> sp. nov.   | LSUHC 12879   | Sanpel Cave 21.3 km south-east of Mawlamyine, Mawlamyine District, Mon State, Myanmar (N16°22.427, E97°46.388)    | MF872339    |

Table 1. Continued

| Taxon                            | Catalogue no.             | Locality                                                                                                             | GenBank no. |
|----------------------------------|---------------------------|----------------------------------------------------------------------------------------------------------------------|-------------|
| <i>C. sanpelensis</i> sp. nov.   | LSUHC 12880               | Sanpel Cave 21.3 km south-east of Mawlamyine, Mawlamyine District, Mon State, Myanmar (N16°22.427, E97°46.388)       | MF872340    |
| <i>C. sanpelensis</i> sp. nov.   | LSUHC 12881               | Sanpel Cave 21.3 km south-east of Mawlamyine, Mawlamyine District, Mon State, Myanmar (N16°22.427, E97°46.388)       | MF872341    |
| <i>C. sanpelensis</i> sp. nov.   | LSUHC 12883               | Sanpel Cave 21.3 km south-east of Mawlamyine, Mawlamyine District, Mon State, Myanmar (N16°22.427, E97°46.388)       | MF872342    |
| <i>C. sanpelensis</i> sp. nov.   | LSUHC 12886               | Sanpel Cave 21.3 km south-east of Mawlamyine, Mawlamyine District, Mon State, Myanmar (N16°22.427, E97°46.388)       | MF872343    |
| <i>C. sanpelensis</i> sp. nov.   | LSUHC 12887               | Sanpel Cave 21.3 km south-east of Mawlamyine, Mawlamyine District, Mon State, Myanmar (N16°22.427, E97°46.388)       | MF872344    |
| <i>C. sanpelensis</i> sp. nov.   | LSUHC 12889               | Sanpel Cave 21.3 km south-east of Mawlamyine, Mawlamyine District, Mon State, Myanmar (N16°22.427, E97°46.388)       | MF872345    |
| <i>C. sanpelensis</i> sp. nov.   | LSUHC 12890               | Sanpel Cave 21.3 km south-east of Mawlamyine, Mawlamyine District, Mon State, Myanmar (N16°22.427, E97°46.388)       | xxxxxxxxx   |
| <i>C. shwetaungorum</i> sp. nov. | BYU 52225                 | 5.3 km north of Pyinyaung Village at the Apache Cement factory mining site, Mandalay Region (N20°52.191, E96°24.296) | MF872346    |
| <i>C. shwetaungorum</i> sp. nov. | BYU 52226                 | 5.0 km north of Pyinyaung Village at the Apache Cement factory mining site, Mandalay Region (N20°52.499, E96°24.582) | MF872347    |
| <i>C. shwetaungorum</i> sp. nov. | BYU 52227                 | 5.3 km north of Pyinyaung Village at the Apache Cement factory mining site, Mandalay Region (N20°52.191, E96°24.296) | MF872348    |
| <i>C. shwetaungorum</i> sp. nov. | LSUHC 12935               | 5.0 km north of Pyinyaung Village at the Apache Cement factory mining site, Mandalay Region (N20°52.499, E96°24.582) | MF872349    |
| <i>C. shwetaungorum</i> sp. nov. | LSUHC 12937               | 5.0 km north of Pyinyaung Village at the Apache Cement factory mining site, Mandalay Region (N20°52.499, E96°24.582) | MF872350    |
| <i>C. shwetaungorum</i> sp. nov. | LSUHC 12896               | 5.3 km north of Pyinyaung Village at the Apache Cement factory mining site, Mandalay Region (N20°52.191, E96°24.296) | MF872351    |
| <i>C. shwetaungorum</i> sp. nov. | LSUHC 12897               | 5.3 km north of Pyinyaung Village at the Apache Cement factory mining site, Mandalay Region (N20°52.191, E96°24.296) | MF872352    |
| <i>C. shwetaungorum</i> sp. nov. | LSUHC 12898               | 5.3 km north of Pyinyaung Village at the Apache Cement factory mining site, Mandalay Region (N20°52.191, E96°24.296) | MF872353    |
| <i>C. sinyineensis</i> sp. nov.  | LSUHC 12835               | Sin Yine Cave 18.5 km south-east of Hpa-an, Hpa-an District, Kayin State, Myanmar (N16°44.605, E97°29.493)           | MF872354    |
| <i>C. sinyineensis</i> sp. nov.  | LSUHC 12836               | Sin Yine Cave 18.5 km south-east of Hpa-an, Hpa-an District, Kayin State, Myanmar (N16°44.605, E97°29.493)           | MF872355    |
| <i>C. sinyineensis</i> sp. nov.  | LSUHC 12837               | Sin Yine Cave 18.5 km south-east of Hpa-an, Hpa-an District, Kayin State, Myanmar (N16°44.605, E97°29.493)           | MF872356    |
| <i>C. thirakhupti</i>            | ZMKU_R_00732, LSUHC 12467 | Tham Khao Sonk Hill, Surat Thani Province, Thailand                                                                  | MF872357    |
| <i>C. thirakhupti</i>            | ZMKU_R_00733, LSUHC 12468 | Tham Khao Sonk Hill, Surat Thani Province, Thailand                                                                  | MF872358    |



**Table 1.** *Continued*

| Taxon                                       | Catalogue no. | Locality                                                                                                  | GenBank no. |
|---------------------------------------------|---------------|-----------------------------------------------------------------------------------------------------------|-------------|
| <i>C. welpyanensis</i><br><b>sp. nov.</b>   | LSUHC 12784   | Wel Pyan Cave 35 km north of Hpa-an, Hpa-an District, Kayin State, Myanmar (N17°12.188, E97°37.066)       | MF872359    |
| <i>C. welpyanensis</i><br><b>sp. nov.</b>   | LSUHC 12785   | Wel Pyan Cave 35 km north of Hpa-an, Hpa-an District, Kayin State, Myanmar (N17°12.188, E97°37.066)       | MF872360    |
| <i>C. welpyanensis</i><br><b>sp. nov.</b>   | LSUHC 12786   | Wel Pyan Cave 35 km north of Hpa-an, Hpa-an District, Kayin State, Myanmar (N17°12.188, E97°37.066)       | MF872361    |
| <i>C. welpyanensis</i><br><b>sp. nov.</b>   | LSUHC 12792   | Wel Pyan Cave 35 km north of Hpa-an, Hpa-an District, Kayin State, Myanmar (N17°12.188, E97°37.066)       | MF872362    |
| <i>C. yathepyanensis</i><br><b>sp. nov.</b> | BYU 52228     | Yathe Pyan Cave 9 km south-west of Hpa-an, Hpa-an District, Kayin State, Myanmar (N16°50.114, E97°34.243) | MF872363    |
| <i>C. yathepyanensis</i><br><b>sp. nov.</b> | BYU 52229     | Yathe Pyan Cave 9 km south-west of Hpa-an, Hpa-an District, Kayin State, Myanmar (N16°50.114, E97°34.243) | MF872364    |
| <i>C. yathepyanensis</i><br><b>sp. nov.</b> | LSUHC 12821   | Yathe Pyan Cave 9 km south-west of Hpa-an, Hpa-an District, Kayin State, Myanmar (N16°50.114, E97°34.243) | MF872365    |
| <i>C. yathepyanensis</i><br><b>sp. nov.</b> | LSUHC 12822   | Yathe Pyan Cave 9 km south-west of Hpa-an, Hpa-an District, Kayin State, Myanmar (N16°50.114, E97°34.243) | MF872366    |
| <i>C. yathepyanensis</i><br><b>sp. nov.</b> | LSUHC 12823   | Yathe Pyan Cave 9 km south-west of Hpa-an, Hpa-an District, Kayin State, Myanmar (N16°50.114, E97°34.243) | MF872367    |

Accession numbers for the other specimens used are in [Agarwal \*et al.\* \(2014\)](#).

**Table 2.** Primer sequences used in this study for amplification and sequencing the *ND2* gene and the flanking tRNAs

| Primer name | Primer reference                           |          | Sequence                      |
|-------------|--------------------------------------------|----------|-------------------------------|
| L4437b      | <a href="#">Macey <i>et al.</i> (1997)</a> | External | 5'-AAGCAGTTGGGCCCATACC-3'     |
| CyrtintF1   | <a href="#">Siler <i>et al.</i> (2010)</a> | Internal | 5'-TAGCCYTCTCYTCYATYGGCC-3'   |
| CyrtintR1   | <a href="#">Siler <i>et al.</i> (2010)</a> | Internal | 5'-ATTGTKAGDGTGRCYAGGSTKGG-3' |
| H5934       | <a href="#">Macey <i>et al.</i> (1997)</a> | External | 5'-AGRGTGCCAATGTCTTTGTGRTT-3' |

were visualized and checked in Tracer 1.6.0 ([Rambaut \*et al.\*, 2014](#)) to ensure ESS values were above 200 for all parameters.

#### MORPHOLOGICAL ANALYSIS

Colour notes were taken from living specimens and digital images of living specimens of all possible age classes prior to preservation. Measurements were taken on the left side of the body when possible to the nearest 0.1 mm by M.S.G. using Mitutoyo dial callipers under a Nikon SMZ 1500 dissecting microscope. Measurements taken were: snout-vent length (SVL), taken from the tip of snout to the vent; tail length (TL), taken from the vent to the tip of the tail, original or regenerated; tail width (TW), taken at the base of the tail immediately posterior to the postcloacal swelling; forearm length (FL), taken on the dorsal surface from the posterior margin of the elbow while flexed 90° to the inflection of the flexed wrist; tibia length (TBL), taken on the ventral surface from the posterior surface of the knee

while flexed 90° to the base of the heel; axilla to groin length (AG), taken from the posterior margin of the forelimb at its insertion point on the body to the anterior margin of the hindlimb at its insertion point on the body; head length (HL), the distance from the posterior margin of the retroarticular process of the lower jaw to the tip of the snout; head width (HW), measured at the angle of the jaws; head depth (HD), the maximum height of head measured from the occiput to the throat; eye diameter (ED), the greatest horizontal diameter of the eyeball; eye to ear distance (EE), measured from the anterior edge of the ear opening to the posterior edge of the eyeball; eye to snout distance (ES), measured from anteriormost margin of the eyeball to the tip of snout; eye to nostril distance (EN), measured from the anterior margin of the eye ball to the posterior margin of the external nares; inter orbital distance (IO), measured between the anterior edges of the orbit; ear diameter (EL), the greatest vertical distance of the ear opening; and internarial distance (IN), measured between the nares across the rostrum.

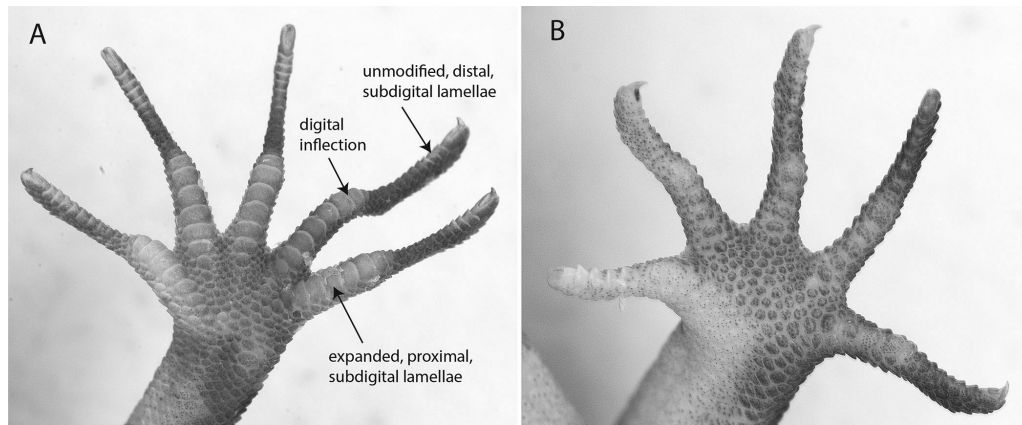

**Figure 3.** Underside of the right hand of (A) *Cyrtodactylus linnoensis* sp. nov. (BYU 52231) and (B) *C. pyinyaungensis* sp. nov. (BYU 52234) illustrating gross differences in digit and subdigital lamellae morphology.

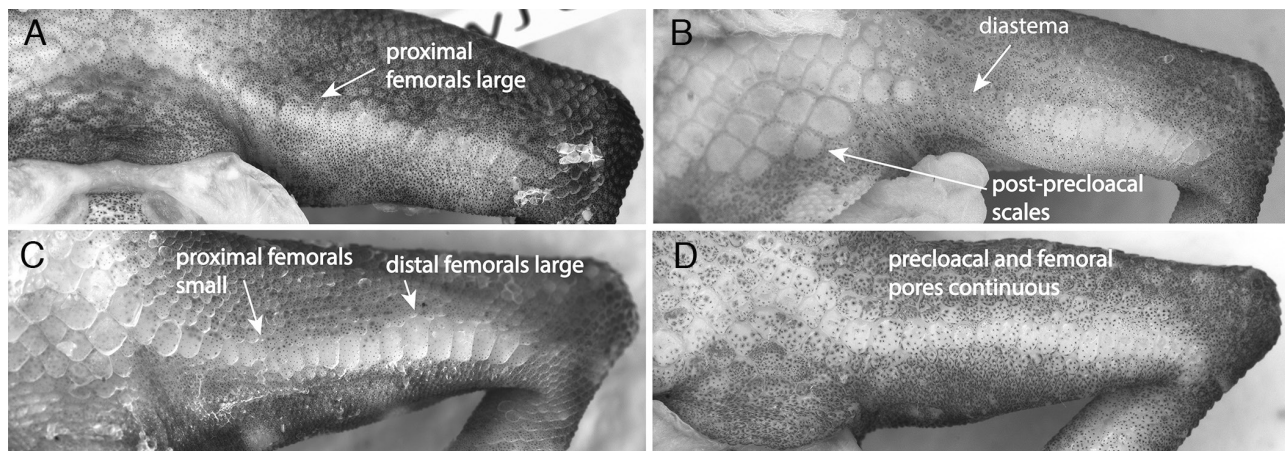

**Figure 4.** Differences in, and arrangement of femoral, preloacal and post-preloacal scale morphology. A, *Cyrtodactylus aequalis* (LSUHC 12895). B, *Cyrtodactylus sanpelensis* sp. nov. (LSUHC 12883). C, *Cyrtodactylus linnoensis* sp. nov. (BYU 52231). D, *Cyrtodactylus dammathetensis* sp. nov. (LSUHC 12862).

Meristic characters taken by M.S.G. were the numbers of supralabial (SL) and infralabial (IL) scales counted from the largest scale immediately below the posterior margin of the eyeball to the rostral and mental scales, respectively; the number of paravertebral tubercles (PVT) between limb insertions counted in a straight line immediately left of the vertebral column; the number of longitudinal rows of body tubercles (LRT) counted transversely across the centre of the dorsum from one ventrolateral fold to the other; the number of longitudinal rows of ventral scales (VS) counted transversely across the centre of the abdomen from one ventrolateral fold to the other; the number of expanded subdigital lamellae proximal to the digital inflexion on the fourth toe (4TLE) counted from the base of the first phalanx where it contacts the body of the foot to the largest scale on the digital inflexion (Fig. 3), large continuous scales on the palmar and plantar surfaces were

not counted; the number of small, unmodified subdigital lamellae distal to the digital inflexion on the fourth toe (4TLU) counted from the digital inflexion to the claw (Fig. 3); and the total number of subdigital lamellae (4TL) beneath the fourth toe (i.e. 4TLE + 4TLU = 4TL). The total number of enlarged femoral scales (FS) from each thigh combined as a single metric. In some species, only the distalmost scales are greatly enlarged and the proximal scales are smaller, whereas in others the greatly enlarged scales are continuous with the enlarged preloacal scales and the separation of the two scales rows was determined to be at a point even with the lateral body margin (Fig. 4). The total number of femoral pores (FP) in males (i.e. the sum of the number of enlarged pore-bearing femoral scales from each leg combined as a single metric—not all enlarged femoral scales have pores). The number of enlarged preloacal scales (PS); the number of preloacal pores in (PP)

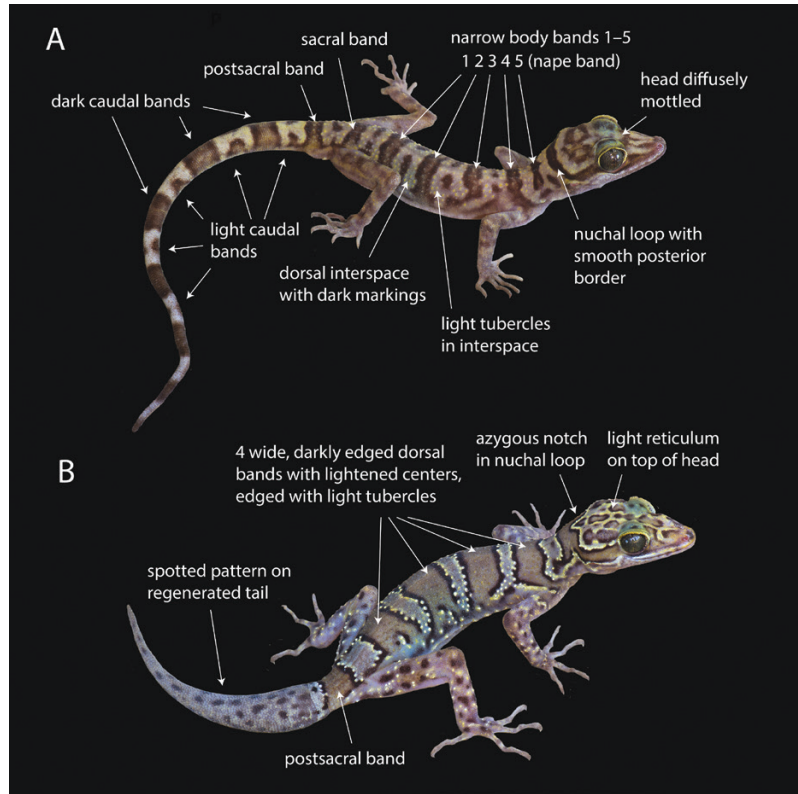

**Figure 5.** Some of the colour pattern characteristics used to differentiate species in the Indo-Chinese clade. A, *Cyrtodactylus pharbaungensis* sp. nov. (LSUHC 12871). B, *Cyrtodactylus linnwayensis* sp. nov. (BYU 52215).

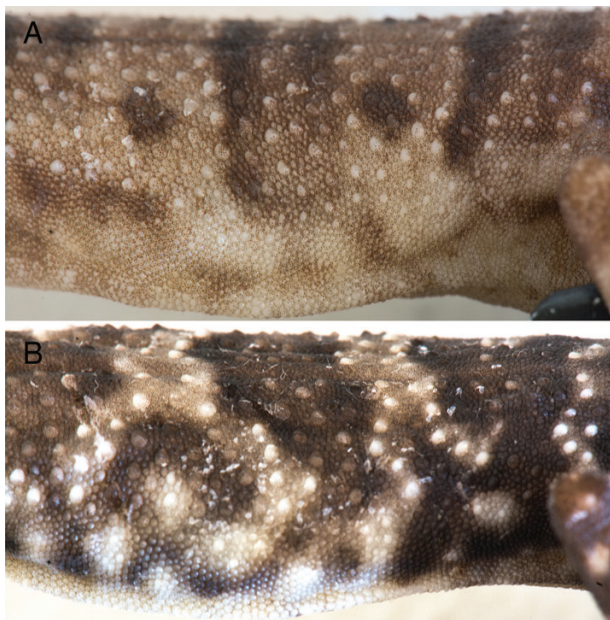

**Figure 6.** A, weak, less densely packed tuberculation in *Cyrtodactylus pharbaungensis* sp. nov. (LSUHC 12871). B, strong tuberculation in *C. linnoensis* sp. nov. (BYU 52231).

in males; the number of continuous femoropreloacal pores (FPP) in males (Fig. 4); and the number of rows of post-preloacal scales (PPS) on the midline between the enlarged preloacal scales and the vent (Fig. 4); number of body bands (BB) between the nuchal loop (dark band running from eye to eye) and the hindlimb insertions not including the sacral or postsacral bands, although the dark band on the nape—which is variably present—is considered as part of this count (Fig. 5); the number of light caudal bands (LCB) on an original tail; and the number of dark caudal bands (DCB) on an original tail.

Non-meristic morphological characters evaluated were the degree of body tuberculation—weak tuberculation referring to dorsal body tubercles that are relatively low, small, less densely packed and weakly keeled, whereas prominent tuberculation refers to tubercles that are larger, higher (raised) and prominently keeled (Fig. 6); body tubercles extending past the base of the tail or not (Fig. 7); enlarged femoral scales and preloacal scales contiguous or separated by a diastema at the base of the femora (Fig. 4); and the relative length to width ratio of the transversely expanded, median subcaudal scales and whether or not they extend onto the lateral surface of the tail (Fig. 8).

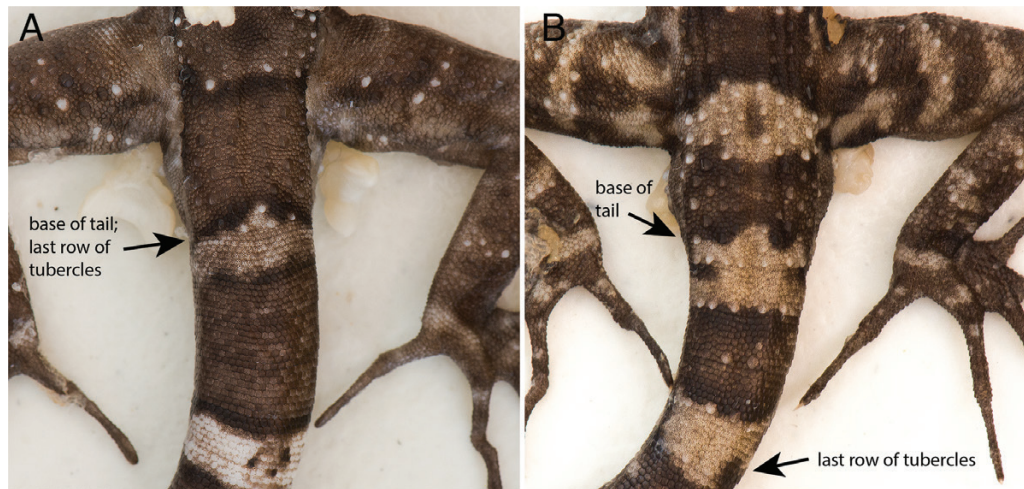

**Figure 7.** A, body tubercles not extending past the base of the tail in *Cyrtodactylus shwetaungorum* sp. nov. (LSUHC 12937). B, body tubercles extending past the base of the tail in *C. dammathetensis* sp. nov. (LSUHC 12862).

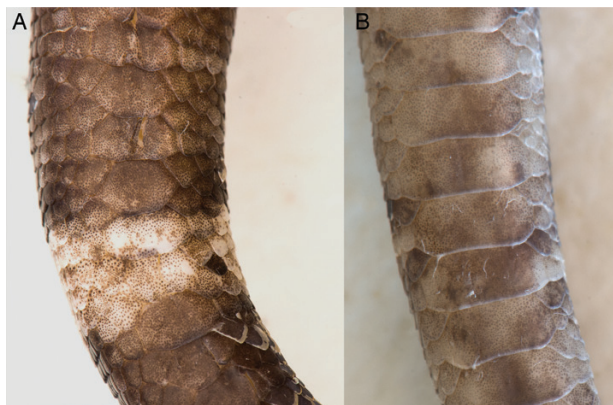

**Figure 8.** A, median subcaudal scales approximately twice as wide as long not extending onto the lateral surface of the tail in *Cyrtodactylus shwetaungorum* sp. nov. (LSUHC 12937). B, median subcaudal scales approximately three times as wide as long, extending onto the lateral surface of the tail in *C. dammathetensis* sp. nov. (LSUHC 12862).

Colour pattern characters (Fig. 5) evaluated were the nuchal loop being continuous from eye to eye, separated medially into paravertebral elements, bearing an anterior azygous notch or not, and the posterior border being straight (smooth), sinuous or jagged; the first dorsal body band bearing an anterior, azygous notch or not; dorsal body bands bearing paired, paravertebral elements or not; dark dorsal body bands wider than light interspaces, with or without lightened centres, edged with light tubercles or not, zigzag-shaped or more regular (straight or even); dark markings present or absent in the dorsal interspaces; light tubercles dispersed throughout the dorsal interspaces or not; ventrolateral body fold white, appearing as a wide or narrow stripe; top of head bearing

combinations of dark diffuse mottling or dark, distinct blotches overlain with a light-coloured reticulating network or not; anterodorsal margin of thighs and brachia whitish due to a lack of dark pigment; light caudal bands bearing dark markings or immaculate; light caudal bands encircle tail or not; dark caudal bands wider than light caudal bands; and regenerated tail bearing a pattern of distinct, dark spots or not.

An analysis of variance (ANOVA) was performed to ascertain if statistically significant mean differences among meristic characters ( $P < 0.05$ ) existed. ANOVAs having a  $P$ -value less than 0.05 indicating that statistical differences existed were subjected to a Tukey HSD test to ascertain which population pairs differed significantly from each other. Principal component analysis (PCA) and discriminant analysis of principal components (DAPC) were used to determine if species of each species group occupied a unique position in morphospace and the degree to which their variation in morphospace coincided with their species boundaries delimited by the molecular phylogenetic and univariate analyses. PCA, implemented by the `prcomp` command in R v 3.2.1 (R Core Team, 2015), searches for the best overall low-dimensional representation of significant morphological variation in the data. Femoral and preloocal pore counts were excluded from the PCA due to their presence in only males. All PCA data were log-transformed prior to analysis and scaled to their SD in order to normalize their distribution so as to ensure characters with very large and very low values did not over-leverage the results owing to intervariable non-linearity. To characterize clustering and separation in morphospace, a DAPC was performed to search for linear combinations of morphological variables having the greatest between-group variance and the smallest within-group variance (Jombart, Devillard & Balloux,

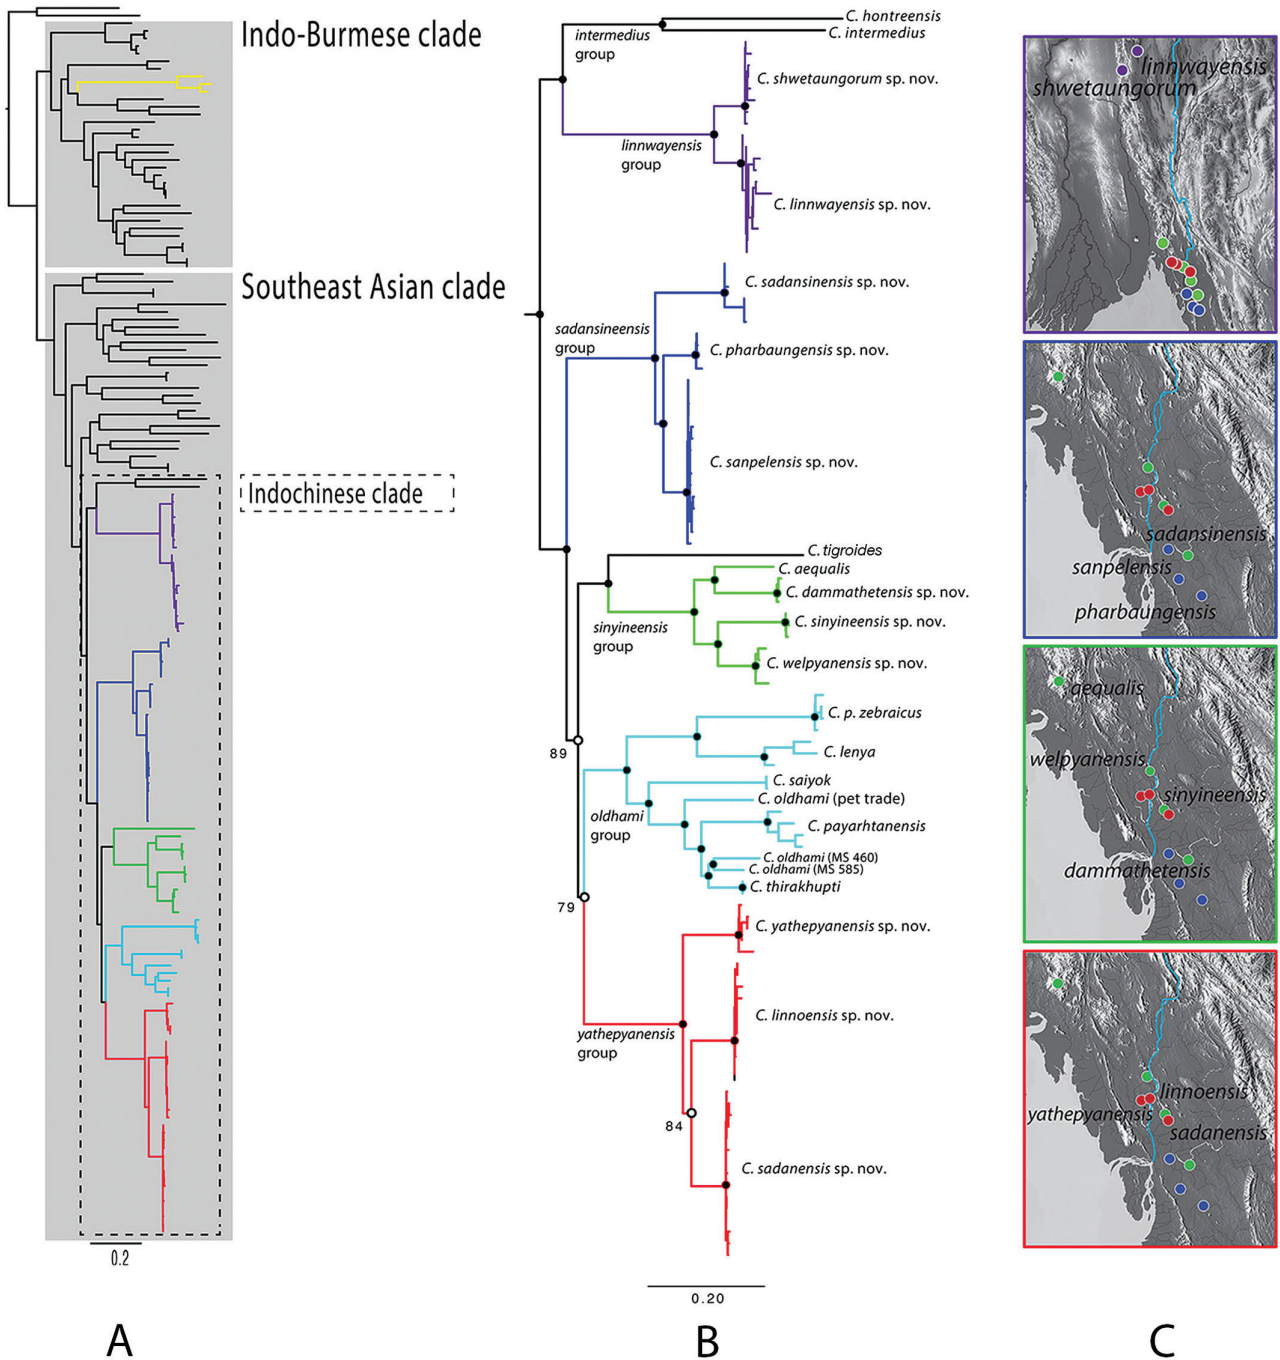

Downloaded from https://academic.oup.com/zoolinmean/article/182/4/862/4560774 by guest on 23 April 2024

**Figure 9.** A, maximum likelihood topology illustrating the relationships of the Indo-Burmese, Southeast Asian and Indo-Chinese clades. Yellow branches represent *Cyrtodactylus annadalei* and the sister species *C. pyinyaungensis* sp. nov. and *Cyrtodactylus* sp. Popa. B, maximum likelihood topology of the Indo-Chinese clade showing the relationships of the species groups to one another and the interspecies relationships within each species group. Solid circles represent nodes supported by BPP and UF values of greater than 95% and 95, respectively. Open circles denote weakly supported nodes of UF values < 95. C, distribution of the species within the colour-coded Burmese species groups in relation to the Salween River denoted in blue.

2010). DAPC relies on log-transformed data from the PCA as a prior step to ensure that variables analysed are not correlated and number fewer than the sample

size. Principal components with eigenvalues greater than one were retained for the DAPC analysis according to the criterion of Kaiser (1960). All statistical

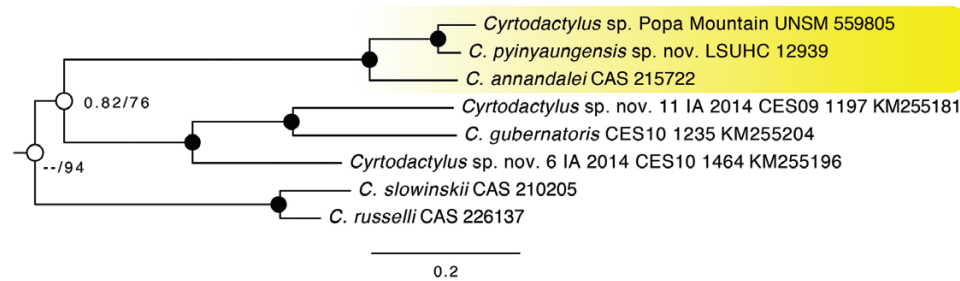

**Figure 10.** Maximum likelihood topology showing the relationships of *Cyrtodactylus annandalei*, *C. pyinyaungensis* sp. nov. and *Cyrtodactylus* sp. Popa Mountain to each other and other closely related species of within the Indo-Burmese clade. Solid circles represent nodes supported by BPP and UF values of greater than 95% and 95, respectively. Open circles denote weakly supported nodes.

analyses were performed using the platform R v 3.2.1 (R Core Team, 2015).

Museum abbreviations follow Frost (2016) except for LSUHC referring to the La Sierra University Herpetological Collection, La Sierra University, Riverside, CA, USA; MS referring to Montri Sumontha, Ranong Marine Fisheries Station, Ranong 85000, Thailand; and PLWJ referring to Perry L. Wood, Jr. field series, Department of Biology, Brigham Young University, Provo, UT 84602, USA).

## RESULTS

All three molecular analyses showed complete topological congruence with well-supported nodes throughout most of the tree and all analyses indicate that the 12 new species described below from east-central and southern Myanmar do not form a monophyletic group but are embedded within two different major clades of Indo-Malayan *Cyrtodactylus* (Fig. 9). The population from just north of Pyinyaung village in the Shan Hills from Mandalay Region is nested with a larger well-supported (BPP 1.00/UF 99) clade of Indo-Burmese species (Figs 9, 10) first identified by Wood *et al.* (2012) and augmented by Agarwal *et al.* (2014). The analyses further indicate that the individuals from the 11 other newly discovered populations from Mandalay Region, Shan, Kayin and Mon states collectively comprise four of six well-supported (1.00/100) monophyletic species groups referred to here as the *intermedius* (*sensu* Grismer *et al.*, 2015b), *linnwayensis*, *sadansinensis*, *sinyineensis*, *oldhami* and *yathepyanensis* groups. All these groups belong to a larger, well-supported (1.00/100) clade of Southeast Asian species within which they comprise a well-supported (0.98/100) Indo-Chinese clade (Fig. 9). The Indo-Chinese clade contains two major lineages, each with multiple subclades. One of these well-supported (0.99/96) major

lineages is composed of the *linnwayensis* group from the Shan Mountains and its sister lineage the *intermedius* group from the hilly Cardamom regions of eastern Thailand, southern Cambodia and southern Vietnam (Figs 2, 9). The other well-supported (0.99/100) major lineage contains the remaining three species groups from Myanmar and a predominantly Thai species group of which the *sadansinensis* group is the weakly supported (--/89) basal species group lineage (Figs 2, 9). The remaining two Burmese species groups are related to multiple lineages of taxa from western Thailand and the Thai-Malay Peninsula. *Cyrtodactylus tigroides* Bauer from western Thailand is the sister species to the *sinyineensis* group, whereas the well-supported (1.00/100) *oldhami* group containing *C. cf. peguensis zebraicus* Taylor, *C. saiyok* Panitvong, Sumontha, Tunprasert, & Pauwels, *C. oldhami* (Theobald), *C. thirakhupti* Pauwels, Bauer, Sumontha, & Chanhome from western and Peninsular Thailand and *C. lenya* Connette, *et al.* and *C. payarhtensis* Connette, *et al.* from Peninsular Myanmar is the weakly supported (--/79) sister lineage to the well-supported (1.00/100) *yathepyanensis* group (Figs 2, 9). The molecular analyses further indicate that the new Burmese species are strongly supported (1.00/100) as being exclusive lineages—comprised only of individuals from their respective populations (Figs 9, 11).

The tree recovered here (Fig. 9) differs from that of Wood *et al.* (2012) and Agarwal *et al.* (2014) in that the *oldhami* group and *C. tigroides* in their trees are not part of a well-supported clade containing the *intermedius* group but are related to species from Papua New Guinea. Wood *et al.* (2012) recovered the *intermedius* group in an unsupported polytomy containing the *pulchellus* group (*sensu* Grismer *et al.*, 2012) plus the sister species *C. elok* Dring and *C. interdigitalis* Ulber and placed the *oldhami* group and *C. tigroides* in another unsupported polytomy containing a Papua New

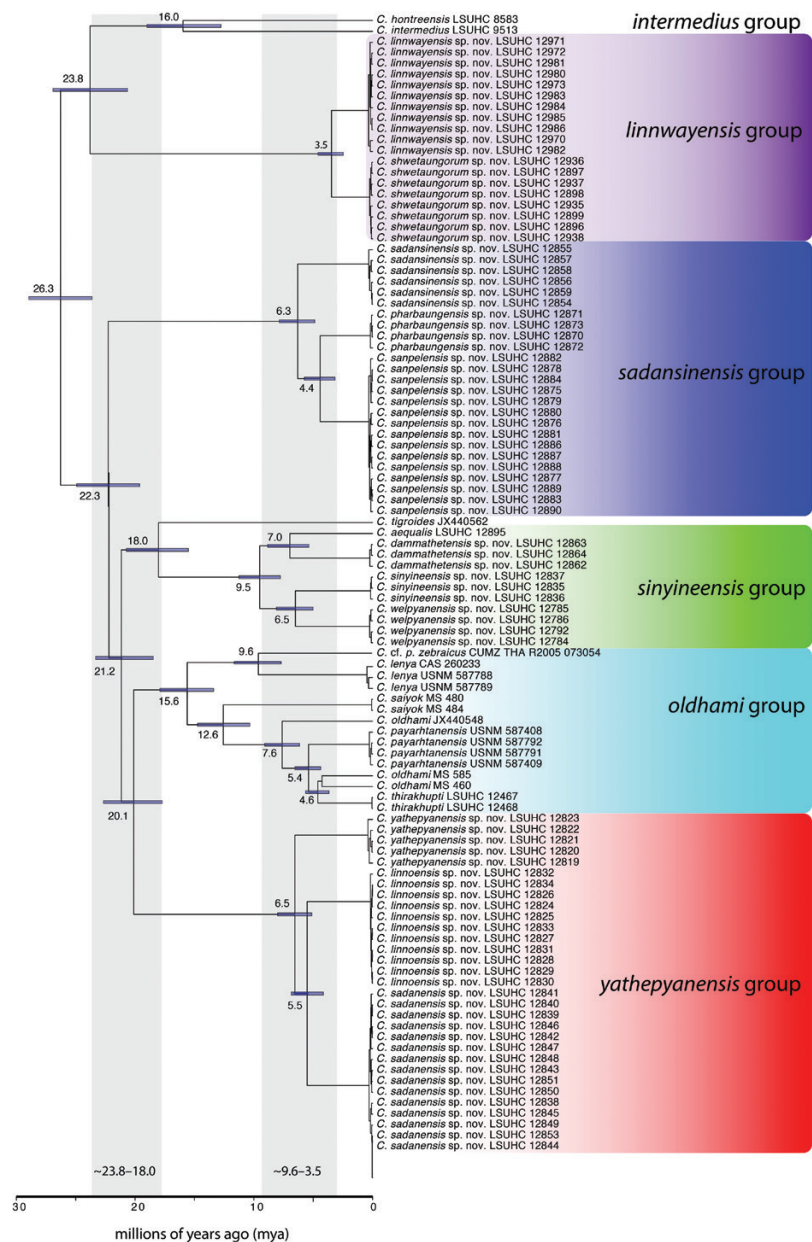

**Figure 11.** BEAST chronogram of the species and species groups of the Indo-Chinese clade. Numbers at the nodes are mean ages in millions of years. Bars at the nodes represent the 95% highest posterior density (HPD) about the means.

Guinean group. *Agarwal et al.* (2014) recovered the *intermedius* group as part of an unsupported polytomy containing the *pulchellus* group, the *oldhami* group, *C. tigroides* and a Paupa New Guinean group. Owing to the addition of the new Burmese species and additional species from the *oldhami* group, the polytomous nodes of *Wood et al.* (2012) and *Agarwal et al.* (2014) are resolved and all three well-supported analyses recover the *intermedius* group as the well-supported (0.99/96) sister lineage to the *linnwayensis* group and the *oldhami* group

is placed with Indo-Chinese species—as opposed to New Guinean species—and may be the sister lineage to the *yathepyanensis* group (Fig. 9).

The univariate and multivariate morphological analyses support the molecular analyses by indicating that the new species within each group are well-separated from each other in morphospace with no overlap (Fig. 12; Fig. S1) and bear a number of statistically significant mean differences in varying combinations of meristic characters (Tables 3–5). Additionally, notable consistent differences in scale morphology and aspects

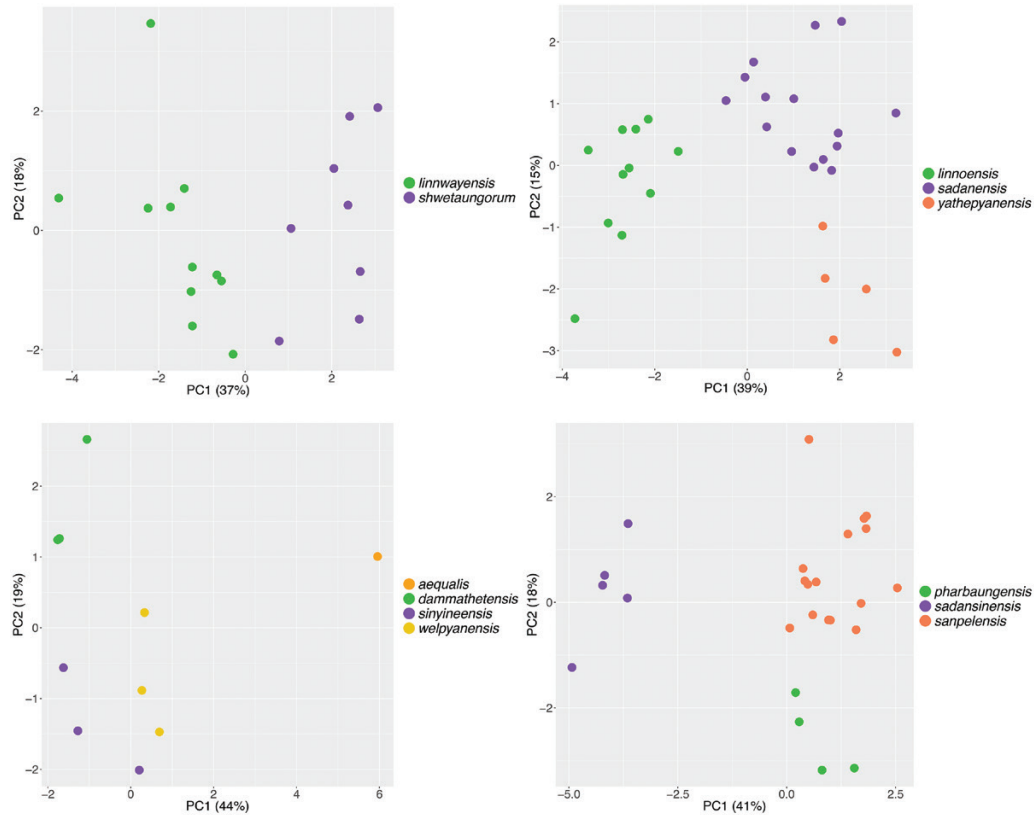

**Figure 12.** Principal component analysis (PCA) of the species of the *linnwayensis* species group, *sadansinensis* species group, *yathepyanensis* species group and *sinyineensis* species group showing complete separation of all species within each group along the first two principal components.

of coloration and pattern also provide reliable diagnostic character differences among the species (Table 7). The content of each new species group, the group’s definition, and the diagnoses and descriptions of the new species within each group follows.

**SYSTEMATICS AND TAXONOMY**

ORDER SQUAMATA OPPEL, 1811  
 FAMILY GEKKONIDAE GRAY, 1825  
 GENUS *CYRTODACTYLUS* GRAY, 1827  
***CYRTODACTYLUS PYINYAUNGENSIS* SP. NOV.**  
 PYINYAUNG BENT-TOED GECKO  
 (FIG. 13; TABLE 6)

**Holotype:** Adult male LSUHC 13149 collected on 30 March 2017 at 1030 h by Myint Kyaw Thura, Htet Kyaw, Myint Kyaw Lin, Mathhew L. Murdoch, Marta S. Grismer and L. Lee Grismer from 5.7 km north of Pyinyaung Village at the Apache Cement factory mining site, Mandalay Region, Myanmar (N20°52.191, E96°24.296; 472 m in elevation).

**Paratypes:** Adult female BYU 52234 collected on 12 October 2016 at 1030 h by Evan S. H. Quah, Perry L. Wood, Jr., Matthew L. Murdoch, Myint Kyaw Thura, Thaw Zin, Aung Lin, Htet Kyaw and L. Lee Grismer from 5.3 km north of Pyinyaung Village at the Apache Cement factory mining site, Mandalay Region, Myanmar (N20°52.191, E96°24.296; 642 m in elevation). Adult female LSUHC 13150 and adult male LSUHC 13149 bear the same collection data as the holotype. Adult female 13147 bears the same collection as the holotype except that it was collected on 29 March 2017.

**Diagnosis:** *Cyrtodactylus pyinyaungensis* sp. nov. differs from all congeners by having the unique combination of 25–30 paravertebral tubercles; 15–18 longitudinal rows of body tubercles; 30–36 ventral scales; relatively short digits (Fig. 3) with 16–19 subdigital lamellae beneath the fourth toe; raised to moderately keeled body tubercles; no caudal tubercles; enlarged femoral scales; femoral pores in males; relatively narrow subcaudal scales; top of head bearing large, irregularly shaped, dark markings



**Table 3.** Matrix of statistically significant mean differences of characters between species pairs of the *sinyleneensis* group

|                                | <i>dammathetensis</i> sp. nov. | <i>aequalis</i> sp. nov. | <i>sinyleneensis</i> sp. nov. |
|--------------------------------|--------------------------------|--------------------------|-------------------------------|
| <i>dammathetensis</i> sp. nov. | *                              | *                        | *                             |
| <i>aequalis</i> sp. nov.       | IL, VS, FS, PPS                | *                        | *                             |
| <i>sinyleneensis</i> sp. nov.  | LRT, FS, PS                    | IL, LRT, VS,<br>PPS      | *                             |
| <i>welpeyanensis</i> sp. nov.  | PS, BB                         | LRT, VS, PS,<br>PPS      | SL, IL                        |

Abbreviations are listed in the Material and Methods.

**Table 4.** Matrix of statistically significant mean differences of characters between species pairs of the *yathepyanensis* group

|                                | <i>linnoensis</i> sp. nov.              | <i>sadanensis</i> sp. nov. |
|--------------------------------|-----------------------------------------|----------------------------|
| <i>linnoensis</i> sp. nov.     | *                                       | *                          |
| <i>sadanensis</i> sp. nov.     | SL, IL, PVT, LRT, VS, FS, 4TLE, 4TL, PP | *                          |
| <i>yathepyanensis</i> sp. nov. | IL, PVT, LRT, VS, FS, 4TL, U4TL, BB, PP | SL, LRT, BB, FS            |

Abbreviations are listed in the Material and Methods.

**Table 5.** Matrix of statistically significant mean differences of characters between species pairs of the *sadansinensis* group

|                                | <i>pharbaungensis</i> sp. nov.       | <i>sanpelensis</i> sp. nov.                  |
|--------------------------------|--------------------------------------|----------------------------------------------|
| <i>pharbaungensis</i> sp. nov. | *                                    | *                                            |
| <i>sanpelensis</i> sp. nov.    | FS, FP                               | *                                            |
| <i>sadansinensis</i> sp. nov.  | PVT, LRT, FS, PS, 4TLU, 4TL, PPS, PP | PVT, LRT, VS, FS, PS, 4TLU, 4TL, PPS, FP, PP |

Abbreviations are listed in the Material and Methods.

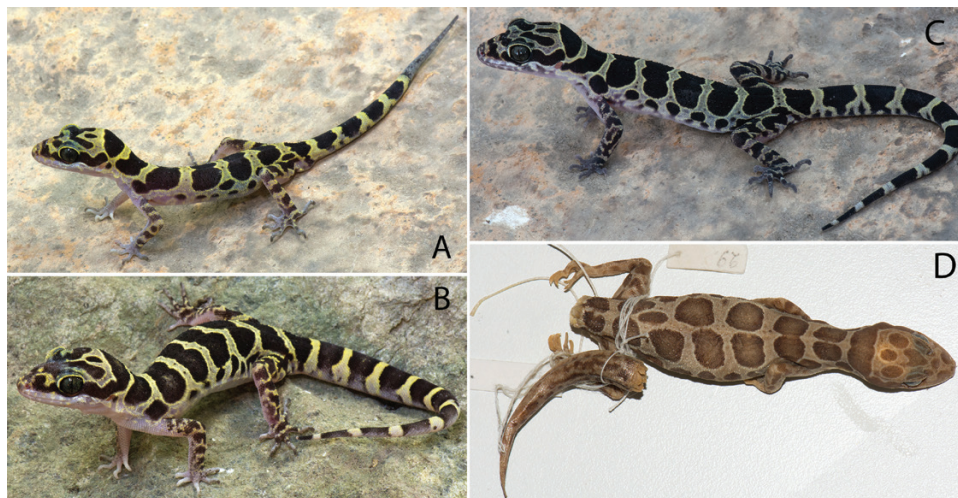

**Figure 13.** A, adult male holotype of *Cyrtodactylus pyinyaungensis* sp. nov. (LSUHC 13149) from 5.7 km north of Pyinyaung Village at the Apache Cement factory mining site, Mandalay Region, Myanmar. B, adult female paratype (LSUHC 13150) from the type locality. C, adult female paratype (LSUHC 13147) from the type locality. D, syntype of *C. peguensis* (BMNH 1946.8.23.10) from Palon, Pegu State, Myanmar.

**Table 6.** Meristic, mensural and colour pattern data from the type series of *Cyrtodactylus pyinyaungensis* sp. nov.

|                                                            | BYU 52234<br>paratype | LSUHC 13150<br>paratype | LSUHC 13148<br>paratype | LSUHC 13147<br>paratype | LSUHC 13149<br>holotype |
|------------------------------------------------------------|-----------------------|-------------------------|-------------------------|-------------------------|-------------------------|
| Sex                                                        | F                     | F                       | M                       | F                       | M                       |
| Supralabials                                               | 8                     | 8                       | 8                       | 8                       | 8                       |
| Infralabials                                               | 6                     | 6                       | 6                       | 6                       | 6                       |
| Body tubercles low and rounded<br>(dome-shaped)            | No                    | No                      | No                      | No                      | No                      |
| Body tubercles pointed and keeled<br>(triangular)          | Yes                   | Yes                     | Yes                     | Yes                     | Yes                     |
| Paravertebral tubercles                                    | 26                    | 25                      | 30                      | 30                      | 30                      |
| Longitudinal rows of tubercles                             | 15                    | 16                      | 17                      | 18                      | 16                      |
| Tubercles extend beyond base of tail                       | No                    | No                      | No                      | No                      | No                      |
| Ventral scales                                             | 32                    | 36                      | 30                      | 30                      | 31                      |
| Proximal subdigital lamellae on<br>fourth toe              | 5(R,L)                | 5(R,L)                  | 5(R,L)                  | 5(R,L)                  | 6R,6L                   |
| Distal subdigital lamellae on fourth<br>toe                | 11(R,L)               | 11(R)12(L)              | 12(R,L)                 | 12(R,L)                 | 13(R,L)                 |
| Total subdigital lamellae on fourth<br>toe                 | 16                    | 16(R)17(L)              | 17                      | 17                      | 19(R,L)                 |
| Enlarged femoral scales (R/L)                              | 10R,12L               | 10(R,L)                 | 10(R,L)                 | 12R,11L                 | 9R,11L                  |
| Femoral pores (R/L)                                        | /                     | /                       | 9(R,L)                  | /                       | 8R,9L                   |
| Enlarged femoral and preloacal<br>scales continuous        | No                    | No                      | No                      | No                      | No                      |
| Preloacal pores                                            | /                     | /                       | 8                       | /                       | 8                       |
| Post-preloacal scales rows                                 | 2                     | 2                       | 2                       | 2                       | 2                       |
| Medial subcaudals two or three<br>times wider than long    | Yes                   | Yes                     | Yes                     | Yes                     | Yes                     |
| Medial subcaudals extend onto lat-<br>eral surface of tail | No                    | No                      | No                      | No                      | No                      |
| Nuchal loop divided medially                               | No                    | No                      | No                      | No                      | No                      |
| Nuchal loop with anterior azygous<br>notch                 | No                    | No                      | No                      | No                      | No                      |
| Posterior border of nuchal loop                            | Smooth                | Smooth                  | Smooth                  | Smooth                  | Smooth                  |
| Dorsal banding with paravertebral<br>elements              | Yes                   | Yes                     | Yes                     | Yes                     | Yes                     |
| Number of body bands                                       | 6                     | 6                       | 6                       | 6                       | 5                       |
| Dorsal bands wider than interspaces                        | Yes                   | Yes                     | Yes                     | Yes                     | Yes                     |
| Dorsal bands with lightened centres                        | No                    | No                      | No                      | No                      | No                      |
| Dorsal bands edged with white<br>tubercles                 | Yes                   | Yes                     | Yes                     | Yes                     | Yes                     |
| Dark markings in dorsal interspaces                        | No                    | No                      | No                      | No                      | No                      |
| Ventrolateral fold whitish                                 | No                    | No                      | No                      | No                      | No                      |
| Top of head diffusely mottled,<br>blotched or patternless  | Blotched              | Blotched                | Blotched                | Blotched                | Blotched                |
| Light reticulum on top of head                             | No                    | No                      | No                      | No                      | No                      |
| Anterodorsal margin of thighs lack-<br>ing pigment         | No                    | No                      | No                      | No                      | No                      |
| Anterodorsal margin of brachia<br>lacking pigment          | No                    | No                      | No                      | No                      | No                      |
| White caudal bands bearing dark<br>markings                | Yes                   | No                      | No                      | Yes                     | No                      |
| White caudal bands encircle tail                           | No                    | No                      | No                      | No                      | No                      |
| Number of light caudal bands                               | 9                     | 11                      | 13                      | 10                      | /                       |

**Table 6.** *Continued*

|                                                 | BYU 52234<br>paratype | LSUHC 13150<br>paratype | LSUHC 13148<br>paratype | LSUHC 13147<br>paratype | LSUHC 13149<br>holotype |
|-------------------------------------------------|-----------------------|-------------------------|-------------------------|-------------------------|-------------------------|
| Number of dark caudal bands                     | 9                     | 11                      | 13                      | 11                      | /                       |
| Dark caudal bands wider than light caudal bands | Yes                   | Yes                     | Yes                     | Yes                     | Yes                     |
| Mature regenerated tail spotted                 | /                     | /                       | /                       | /                       | No                      |
| SVL                                             | 67.7                  | 71.7                    | 55.5                    | 64.3                    | 58.6                    |
| TL                                              | 70                    | 74                      | 59                      | 66                      | 62                      |
| TW                                              | 6.1                   | 6.9                     | 6.0                     | 5.8                     | 5.5                     |
| FL                                              | 10.7                  | 10.4                    | 8.4                     | 10.3                    | 9.2                     |
| TBL                                             | 12.5                  | 12.4                    | 10.3                    | 11.2                    | 10.0                    |
| AG                                              | 28.5                  | 33.0                    | 22.5                    | 28.5                    | 25.7                    |
| HL                                              | 18.4                  | 18.8                    | 14.4                    | 18.4                    | 17.0                    |
| HW                                              | 12.6                  | 13.2                    | 10.2                    | 11.8                    | 10.5                    |
| HD                                              | 7.8                   | 8.7                     | 6.4                     | 7.1                     | 6.3                     |
| ED <a href="#">Boulenger, 1893</a>              | 5.3                   | 5.3                     | 3.5                     | 4.3                     | 4.2                     |
| EE                                              | 5.3                   | 5.7                     | 3.6                     | 5.2                     | 4.6                     |
| ES                                              | 7.3                   | 7.3                     | 6.5                     | 7.5                     | 6.4                     |
| EN                                              | 5.3                   | 5.7                     | 4.7                     | 5.1                     | 4.8                     |
| IO                                              | 5.1                   | 5.7                     | 5.1                     | 5.8                     | 5.6                     |
| EL                                              | 1.9                   | 1.8                     | 1.8                     | 1.7                     | 1.9                     |
| IN                                              | 3.0                   | 3.1                     | 1.9                     | 2.5                     | 2.6                     |

Abbreviations are listed in the Material and Methods. R, right; L, left; /, data unobtainable or not applicable.

and lacking a light-coloured reticulum; nuchal loop not divided medially, lacking an anterior azygous notch, posterior border straight; five or six dark dorsal bands arranged as medially confluent, large, hourglass-shaped, paravertebral markings, wider than interspaces, lacking lightened centres and edged with white tubercles; no dark markings or white tubercles in dorsal interspaces; weak ventrolateral fold and anterodorsal margin of thighs and brachia pigmented; 9–13 dark and light caudal bands; white caudal bands immaculate, not encircling tail; and dark caudal bands wider than white caudal bands.

*Description of holotype:* Adult male SVL 58.6 mm; head moderate in length (HL/SVL 0.29), wide (HW/HL 0.62), flat (HD/HL 0.37), distinct from neck, triangular in dorsal profile; lores inflated, prefrontal region concave, canthus rostralis rounded; snout moderate (ES/HL 0.37), rounded in dorsal profile; eye large (ED/HL 0.25); ear opening elliptical, obliquely oriented, moderate in size (EL/HL 0.11); eye to ear distance greater than diameter of eye; rostral rectangular, partially divided by dorsal furrow, bordered posteriorly by large left and right supranasals, smaller postrostral, laterally by first supralabials; external nares bordered anteriorly by rostral, anterodorsally by large supranasal, posteriorly by three small postnasals, ventrally by first supralabial in point contact; 8(R,L) square to

rectangular supralabials extending to below midpoint of eye, fourth supralabial largest; 6(R,L) infralabials tapering smoothly posteriorly; scales of rostrum and lores flat, larger than granular scales on top of head and occiput; scales on top of head and occiput intermixed with slightly enlarged tubercles; dorsal superciliaries rectangular, smooth; mental triangular, bordered laterally by first infralabials and posteriorly by large, left and right trapezoidal postmentals that contact medially for 60% of their length posterior to mental; one row of slightly enlarged chinshields extending posteriorly to fourth infralabial; and gular and throat scales small, granular to subimbricate, grading posteriorly into larger, flatter, smooth, imbricate, pectoral and ventral scales.

Body relatively short (AG/SVL 0.44) with weak ventrolateral folds in life; dorsal scales small, interspersed with small, raised, subconical, semi-regularly arranged weakly keeled tubercles; tubercles extend from occiput onto base of tail but no farther; tubercles on occiput and nape very small, those on posterior portion of body larger, more strongly keeled; approximately 16 longitudinal rows of dorsal tubercles; 30 paravertebral tubercles; approximately 31 flat, imbricate, ventral scales larger than dorsal scales; eight pore-bearing precloacal scales; two rows of large post-precloacal scales; and no deep precloacal groove or depression.

Forelimbs moderate in stature, relatively short (FL/SVL 0.16); flat scales of forearm larger than those on body, not interspersed with tubercles; palmar scales rounded, slightly raised; digits well-developed, relatively short, inflected at basal, interphalangeal joints; digits slightly narrower distal to inflections; claws well-developed, sheathed by a dorsal and ventral scale; hindlimbs more robust than forelimbs, moderate in length (TBL/SVL 0.17), covered dorsally by granular scales interspersed with large, conical, keeled tubercles and anteriorly by flat, slightly larger scales; ventral scales of femora flat, imbricate, larger than dorsals, 8(R)9(L) pore-bearing femoral scales; 9(R)11(L) enlarged femoral scales not continuous with enlarged precloacal scales; small postfemoral scales form an abrupt union with large, flat ventral scales of posteroventral margin of thigh; subtibial scales flat, imbricate; plantar scales low, flat; digits relatively short, well-developed, inflected at basal, interphalangeal joints; 6(R)7(L) small, unmodified, subdigital lamellae proximal to joint inflection on fourth toe; 13(R,L) slightly larger subdigital lamellae distal to inflection including the large subinflection scale and the ventral claw sheath; and claws well-developed, base of claw sheathed by a dorsal and ventral scale.

Tail moderate in proportions, 5.9 mm in width at base, tapering to a point, first 35 mm of tail original, last 27 mm regenerated; dorsal scales of base of tail granular rapidly becoming flatter posteriorly; median row of transversely enlarged subcaudal scales twice as wide as long, not extending onto lateral margin of tail; two enlarged postcloacal tubercles on both sides of base of tail; and postcloacal scales flat.

**Coloration in life (Fig. 13):** Dorsal ground colour of head body, limbs and tail yellow; dark, transverse bar present on rostrum; top of head bearing a large, dark-brown, irregularly shaped, smoothly edged chevron followed by a large medial spot; labial regions white, forming a distinct line of demarcation between them and a darkly coloured rostrum; wide, dark-brown, nuchal loop extending discontinuously from posterior border of one eye to the other, bearing a straight posterior border, no anterior, azygous notch; wide, dark-brown, band on neck beginning and ending just posterior to ear openings followed by four, wide, dorsal hourglass-shaped bands arranged as medially confluent, large, paravertebral ellipses; bands wider than interspaces, lacking lightened centres, edged with bright-yellow tubercles; one hourglass-shaped post-sacral band; generally no dark markings or white tubercles in interspaces; lower flanks bearing a row of large, dark-brown, circular markings edged in yellow; weak ventrolateral fold, anterodorsal margins of thigh and brachia pigmented not whitish; limbs bearing

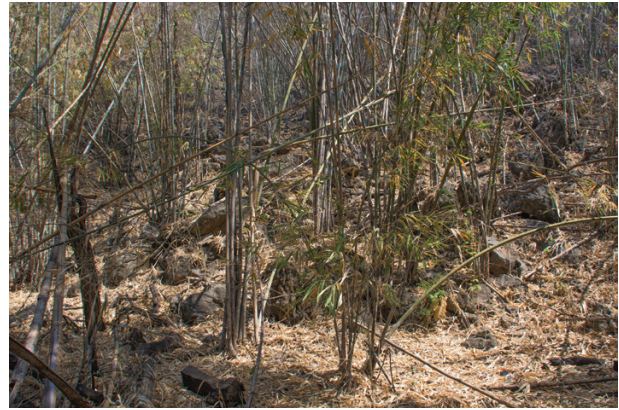

**Figure 14.** Microhabitat structure of *Cyrtodactylus pyinyaungensis* sp. nov. 5.3 km north of Pyinyaung Village in the Sai Taung Range at the Apache Cement factory mining site, Mandalay Region, Myanmar.

dark, irregularly shaped bands; four dark and five light caudal bands on original position of tail; light caudal bands immaculate not encircling tail; dark caudal bands wider than light caudal bands; regenerated portion of tail gray bearing darker, irregular markings; and all ventral surfaces generally immaculate.

**Variation (Fig. S2):** The paratypes closely approximate the holotype in all aspects of coloration and pattern. BYU 52234 and 13147 tend to have a more white than yellow ground colour. The posterior body bands of LSUHC 13150 are more obliquely oriented. The interspaces and light areas on the top of the head in LSUHC 13147 are less immaculate. Meristic differences are listed in Table 6.

**Distribution:** *Cyrtodactylus pyinyaungensis* sp. nov. is known only from the type locality 5.3 km north of Pyinyaung Village, Mandalay Region (Fig. 2) and the adjacent hills in the Sai Taung Range 2.5 km directly east. It is presumed *C. pyinyaungensis* sp. nov. ranges much farther in all directions through the hilly lowlands of this region.

**Etymology:** The specific epithet, *pyinyaungensis* (pronounced *pin-yong-ensis*), is a noun in apposition in reference to the type locality.

**Natural history:** The holotype and the paratypes (LSUHC 13147–48, 13150) were collected in highly disturbed habitats in a low range of mudstone hills (Fig. 14). The area was being burned at the time of collection and the small fires throughout these hills and the surrounding hills will burn for months until the onset of the monsoon season in early to mid-June.

**Table 7.** Summary statistics and diagnostic characters separating *Cyrtodactylus pyinaungensis* sp. nov., *C. peguensis* and *C. annandalei*

|                                           | <i>pyinaungensis</i> sp. nov. | <i>peguensis</i> | <i>annandalei</i> * |
|-------------------------------------------|-------------------------------|------------------|---------------------|
| Summary statistics                        |                               |                  |                     |
| Supralabial scales (SL)                   |                               |                  |                     |
| Mean                                      | 8.0                           | 9                | /                   |
| SD                                        | 0                             | 0                | /                   |
| Range                                     | 8                             | 9                | 7 or 8              |
| <i>N</i>                                  | 5                             | 2                | 3                   |
| Infralabial scales (IL)                   |                               |                  |                     |
| Mean                                      | 6.0                           | 7                | /                   |
| SD                                        | 0                             | 0                | /                   |
| Range                                     | 6                             | 7                | 10                  |
| <i>N</i>                                  | 5                             | 2                | 3                   |
| Paravertebral tubercles (PVT)             |                               |                  |                     |
| Mean                                      | 28.2                          | 25               | /                   |
| SD                                        | 2.49                          | 0                | /                   |
| Range                                     | 25–30                         | 25               | /                   |
| <i>N</i>                                  | 5                             | 2                | /                   |
| Longitudinal rows of body tubercles (LRT) |                               |                  |                     |
| Mean                                      | 16.4                          | 14               | /                   |
| SD                                        | 1.14                          | 0                | /                   |
| Range                                     | 15–18                         | 14               | 16–18               |
| <i>N</i>                                  | 5                             | 2                | 3                   |
| Ventral scales (VS)                       |                               |                  |                     |
| Mean                                      | 31.8                          | 44.0             | /                   |
| SD                                        | 2.49                          | 1.0              | /                   |
| Range                                     | 30–36                         | 43–45            | 43                  |
| <i>N</i>                                  | 5                             | 2                | 3                   |
| Expanded fourth toe lamellae (4TLE)       |                               |                  |                     |
| Mean                                      | 5.2                           | 7                | /                   |
| SD                                        | ±0.45                         | 0                | /                   |
| Range                                     | 5 or 6                        | 7                | /                   |
| <i>N</i>                                  | 5                             | 2                | /                   |
| Unmodified fourth toe lamellae (4TLU)     |                               |                  |                     |
| Mean                                      | 11.8                          | 12               | /                   |
| SD                                        | ±0.84                         | 0                | /                   |
| Range                                     | 11–13                         | 12               | /                   |
| <i>N</i>                                  | 5                             | 2                | /                   |
| Total fourth toe lamellae (4TL)           |                               |                  |                     |
| Mean                                      | 17.0                          | 19               | /                   |
| SD                                        | ±1.22                         | 0                | /                   |
| Range                                     | 16–19                         | 19               | 10                  |
| <i>N</i>                                  | 5                             | 2                | 3                   |
| Enlarged femoral scales (FS)              |                               |                  |                     |
| Mean                                      | 21.0                          | /                | /                   |
| SD                                        | 1.41                          | /                | /                   |
| Range                                     | 20–23                         | 0                | 0                   |
| <i>N</i>                                  | 5                             | 2                | 3                   |
| Enlarged femoral pores (FS)               |                               |                  |                     |
| Mean                                      | 17.5                          | 0                | /                   |
| SD                                        | 1.0                           | 0                | /                   |
| Range                                     | 17 or 18                      | 0                | 10 or 11            |
| <i>N</i>                                  | 2                             | 0                | 1                   |
| Enlarged preloacal scales (PS)            |                               |                  |                     |

Table 7. Continued

|                                                               | <i>pyinyaungensis</i> sp. nov. | <i>peguensis</i> | <i>annandalei</i> * |
|---------------------------------------------------------------|--------------------------------|------------------|---------------------|
| Mean                                                          | 8.0                            | 7.5              | /                   |
| SD                                                            | 0                              | 0.50             | /                   |
| Range                                                         | 8                              | 7 or 8           | 8–12                |
| <i>N</i>                                                      | 5                              | 2                | 3                   |
| Preloacal pores (PP)                                          |                                |                  |                     |
| Mean                                                          | 8                              | 7.5              | /                   |
| SD                                                            | 0                              | 0.50             | /                   |
| Range                                                         | 8                              | 7 or 8           | 11 or 12            |
| <i>N</i>                                                      | 2                              | 2                | 3                   |
| Post-preloacal scale rows (PPS)                               |                                |                  |                     |
| Mean                                                          | 2                              | 3                | /                   |
| SD                                                            | 0                              | 0                | /                   |
| Range                                                         | 2                              | 3                | /                   |
| <i>N</i>                                                      | 3                              | 3                | /                   |
| Body bands (BB)                                               |                                |                  |                     |
| Mean                                                          | 5.8                            | 6                | /                   |
| SD                                                            | 0.45                           | 0                | /                   |
| Range                                                         | 5 or 6                         | 6                | 5                   |
| <i>N</i>                                                      | 5                              | 2                | 3                   |
| Light caudal bands (LCB)                                      |                                |                  |                     |
| Mean                                                          | 10.8                           | 12               | /                   |
| SD                                                            | 1.71                           | 0                | /                   |
| Range                                                         | 9–13                           | 12               | 11                  |
| <i>N</i>                                                      | 4                              | 1                | 3                   |
| Dark caudal bands (DCB)                                       |                                |                  |                     |
| Mean                                                          | 11.0                           | 12               | /                   |
| SD                                                            | 1.63                           | 0                | /                   |
| Range                                                         | 9–13                           | 12               | 11 or 12            |
| <i>N</i>                                                      | 4                              | 1                | 3                   |
| Morphology                                                    |                                |                  |                     |
| Body tubercles low, weakly keeled                             | No                             | Yes              | No                  |
| Body tubercles raised, moderately to strongly keeled          | Yes                            | No               | Yes                 |
| Tubercles extend beyond base of tail                          | No                             | No               | No                  |
| Enlarged femoral scales present                               | Yes                            | No               | No                  |
| Enlarged femoral and preloacal scales continuous              | No                             | /                | /                   |
| Pore-bearing femoral and preloacal scales continuous          | /                              | /                | /                   |
| Enlarged proximal femoral scales ~1/2 size of distal femorals | No                             | /                | /                   |
| Medial subcaudal scales two or three times wider than long    | Yes                            | Yes              | Yes                 |
| Medial subcaudal extend onto lateral surface of tail          | No                             | No               | No                  |
| Colour pattern                                                |                                |                  |                     |
| Nuchal loop divided medially                                  | No                             | No               | No                  |
| Nuchal loop with anterior azygous notch                       | No                             | No               | No                  |
| Posterior border of nuchal loop                               | Straight                       | Straight         | Straight            |
| Band on nape                                                  | Yes                            | Yes              | Yes                 |
| Dorsal banding with paravertebral elements                    | Yes                            | Yes              | No                  |
| Paravertebral elements of dorsal bands confluent              | Yes                            | No               | /                   |
| Dorsal bands wider than interspaces                           | Yes                            | Yes              | No                  |
| Dorsal bands bearing lightened centres                        | No                             | Yes              | No                  |
| Dorsal bands edged with light-coloured tubercles              | Yes                            | Yes              | No                  |
| Shape of dorsal bands                                         | Hourglass                      | Paired blotches  | Diagonal            |
| Dark markings in dorsal interspaces                           | No                             | No               | No                  |

**Table 7.** *Continued*

|                                                      | <i>pyinyaungensis</i> sp. nov. | <i>peguensis</i> | <i>annandalei</i> * |
|------------------------------------------------------|--------------------------------|------------------|---------------------|
| Ventrolateral body fold whitish                      | No                             | No               | /                   |
| Top of head diffusely mottled, blotched or unicolour | Blotched                       | Blotched         | Unicolour           |
| Light reticulum on top of head                       | No                             | No               | No                  |
| Anterodorsal margin of thighs darkly pigmented       | No                             | No               | No                  |
| Anterodorsal margin of brachia darkly pigmented      | No                             | No               | No                  |
| Light caudal bands bearing dark markings             | Variable                       | Yes              | Variable            |
| Light caudal bands encircle tail                     | No                             | No               | /                   |
| Dark caudal bands wider than light caudal bands      | Yes                            | Yes              | No                  |
| Mature regenerated tail spotted                      | No                             | No               | /                   |
| Maximum SVL (mm)                                     | 71.7                           | 70.2             | 55.3                |

/, data were unobtainable or not applicable.

\*Data from Bauer (2003).

Nonetheless, five specimens were observed in two nights. BYU 52234 was collected during October of the previous year (2016) approximately 0.3 m above the ground on the side of a karst boulder. The collection site is situated at the lower end of a steeply sloping valley composed of disturbed secondary forest, scattered outcroppings of karst boulders and shallow lateral drainages feeding into the valley floor at 642 m elevation. Only one specimen was seen in this habitat in four nights of searching. These observations suggest that *C. pyinyaungensis* sp. nov. is a habitat generalist in hilly areas bearing rocky substrates. One hatchling was observed on 29 March 2017 but no gravid females were found.

**Comparisons:** *Cyrtodactylus pyinyaungensis* sp. nov. is part of a large clade of Indo-Burmese species within which it is closely related to *C. annandalei* from which it differs in having six vs. ten infralabial scales; 16–19 vs. ten total subdigital lamellae on the fourth toe; 30–36 vs. 43 ventral scales; 17 or 18 vs. ten or 11 femoral pores; eight vs. 11 or 12 preloacal pores; the presence vs. the absence of enlarged femoral scales; the dorsal bands being wider as opposed to narrower than the interspaces and edged with light-coloured tubercles; the dark caudal bands being wider than the light caudal bands; and the top of the head being blotched as opposed to patternless (Table 7). The sister population of *C. pyinyaungensis* sp. nov. from Popa Mountain approximately 120 km to the west was misidentified as *C. feae* (USNM 559805; Wood *et al.*, 2012 and Agarwal *et al.*, 2014) and was reported to L.L.G. to be *C. peguensis* (G. R. Zug, unpubl. data). Although we do not have access to this specimen, a comparison of its sister species, *C. pyinyaungensis* sp. nov., to one of the syntypes of *C. peguensis* (BMNH 1946.8.23.10) shows that although they are similar in overall colour pattern

(Fig. 13), they differ in that the former has fewer rows of longitudinal tubercles (11 vs. 14); fewer ventral scales (30–36 vs. 43–45); enlarged femoral scales; and femoral pores (Table 7); and dorsal pattern composed of confluent paravertebral markings as opposed to large, separate, paravertebral spots (Fig. 13). Genetic distances among the species of this group range from 11.3 to 15.1%.

#### *The intermedius group*

The monophyletic *intermedius* group is the sister lineage to the *linnwayensis* group (Fig. 9) and ranges from Hon Tre and Phu Quoc islands and isolated mountainous regions in the Mekong Delta of southern Vietnam west through the Cardamom Mountains of southern Cambodia and south-eastern Thailand (Grismer *et al.*, 2015b; Fig. 2) and is composed of *Cyrtodactylus intermedius* (Smith), *C. phuquocensis* Ngo, Grismer & Grismer, and *C. hontreensis* Ngo, Grismer & Grismer. The *intermedius* group is defined by the following characters (Ngo, Grismer & Grismer, 2008, 2010): 9–13 supralabials; 9–12 infralabials; 14–22 longitudinal rows of dorsal tubercles; 38–50 ventral scales; 15–19 subdigital lamellae on the fourth toe; no enlarged femoral not contiguous with enlarged preloacal scales; 7–10 preloacal pores in males; post-preloacal scales large; wide, transverse caudal scales; top of head unicolour to sparsely blotched; no anterior azygous notch in nuchal loop or first body band; no band on nape; 3–5 regularly shaped body bands with lightened centres and edged with light tubercles or markings; anterodorsal margins of thighs, brachia and ventrolateral fold not pigmented; and maximum SVL 72.3–78.0 mm.

#### *The linnwayensis group*

The *linnwayensis* group is a monophyletic group composed of the sister species *Cyrtodactylus linnwayensis* sp. nov.

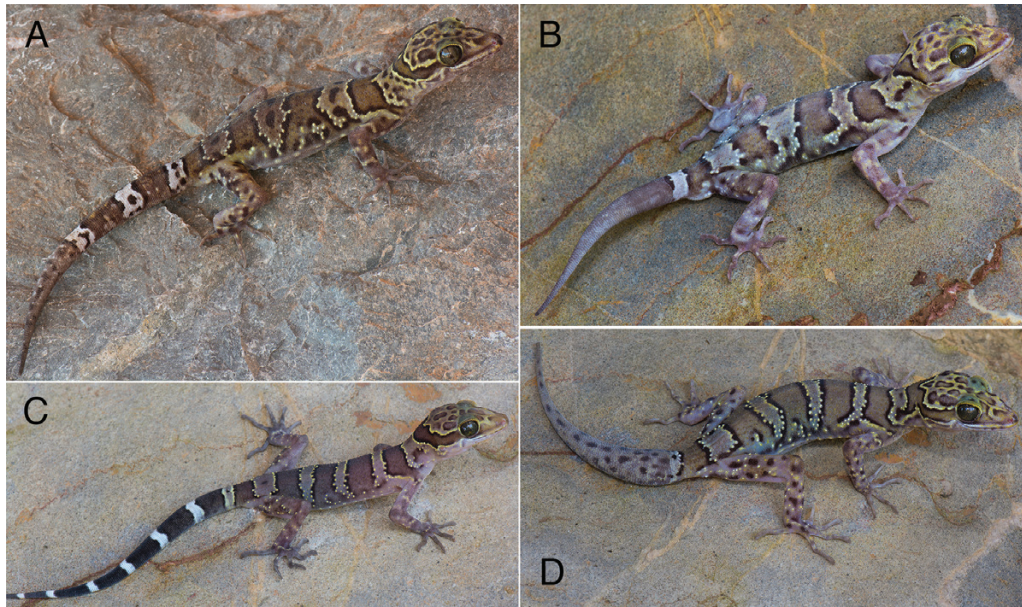

**Figure 15.** Colour pattern variation in *Cyrtodactylus linnwayensis* sp. nov. from the type locality of Yum Twing Gyi and Yae Htwat caves, Linn-Way Village, 12.7 km north-east of Ywarngan, Taunggyi District, Shan State, Myanmar. A, adult male holotype (LSUHC 12983) from Yum Twing Gyi Cave. B, C and D are adult male paratype (LSUHC 12971), subadult male paratype (LSUHC 12973) and adult female paratype (LSUHC 12972), respectively, from Yae Htwat Cave.

and *C. shwetaungorum* sp. nov. (Fig. 9) and range through the western regions of the Shan Hills of the Mandalay Region and Shan State (Fig. 2). This group is defined by the following range of characters 7–9 supralabials; 6–8 infralabials; dorsal body tubercles low, weakly keeled, not extending beyond base of tail; 25–35 paravertebral tubercles; 13–21 longitudinal rows of tubercles; 33–42 ventral scales; 20–23 subdigital lamellae on the fourth toe; enlarged femoral and preloacal scales continuous; 24–32 enlarged femoral scales nearly the same size throughout; 15–22 femoral pores in males; 8–12 enlarged preloacal scales; 6–11 preloacal pores in males; three or four post-preloacal scale rows; transverse caudal scales twice as wide as long, not extending onto lateral subcaudal regions; top of head mottled and bearing light-coloured, reticulated pattern; no band on nape; three or four regular (vs. zigzagged) body bands with lightened centres and edged with light tubercles; anterodorsal margins of thighs, brachia and ventrolateral fold pigmented; eight or nine light caudal bands; 7–9 dark caudal bands; and maximum SVL 101.7–102.2 mm (Table 7). The description and diagnosis of each species follows.

***CYRTODACTYLUS LINNWAYENSIS* SP. NOV.**

LINN-WAY BENT-TOED GECKO

(FIG. 15; TABLE 9)

*Holotype:* Adult male LSUHC 12983 collected on 15 October 2016 at 1500 h by Evan S. H. Quah, L. Lee

Grismer, Perry L. Wood, Jr., Myint Kyaw Thura, Thaw Zin, Matthew L. Murdoch and Htet Kyaw from the Yum Twing Gyi Cave, Linn-Way Village, 12.7 km north-east of Ywangan, Taunggyi District, Shan State, Myanmar (N21°12.964, E96°33.288; 1130 m in elevation).

*Paratypes:* Adult males LSUHC 12984 and BYU 52214 and adult female LUSHC 12986 bear the same collection data as the holotype. Adult male LSUHC 12980, subadult male BYU 52213 and juvenile male LSUHC 12981 bear the same collection data as the holotype except they were collected from an adjacent cave (Lay Htwat Cave) 20 m away between 1800 and 2000 h. Adult male and female LSUHC 12971–72, respectively, and juvenile males LSUHC 12970 and 19273 were collected on 14 October 2016 between 1500 and 2000 h by Myint Kyaw Thura, Evan S. H. Quah, L. Lee Grismer, Perry L. Wood, Jr., Thaw Zin, Matthew L. Murdoch, Marta S. Grismer and Htet Kyaw from the Yae Htwat Cave, Linn-Way Village, 13.3 km north-east of Ywangan, Taunggyi District, Shan State, Myanmar (N21°13.675, E96°33.403; 1132 m in elevation) and 1 km north of Yum Twing Gyi Cave.

*Diagnosis:* *Cyrtodactylus linnwayensis* sp. nov. differs from all congeners by having the unique combination of 7–9 supralabials; 6–8 infralabials; 25–33 paravertebral tubercles; 13–18 longitudinal rows of body tubercles; 34–42 ventral scales; relatively long digits with 8–10 expanded fourth toe subdigital lamellae proximal to the



**Table 8.** Summary statistics and diagnostic characters of the new species from the Burmese species groups

|                                                  | <i>linnwayensis</i> group        |                                 | <i>sadansineensis</i> group        |                                  |
|--------------------------------------------------|----------------------------------|---------------------------------|------------------------------------|----------------------------------|
|                                                  | <i>shwetaungorum</i><br>sp. nov. | <i>linnwayensis</i><br>sp. nov. | <i>pharphaungensis</i><br>sp. nov. | <i>sadansinensis</i><br>sp. nov. |
| <b>Summary statistics</b>                        |                                  |                                 |                                    |                                  |
| <b>Supralabial scales (SL)</b>                   |                                  |                                 |                                    |                                  |
| Mean                                             | 8.3                              | 8                               | 9                                  | 9                                |
| SD                                               | ±0.71                            | ±0.89                           | 0                                  | ±0.71                            |
| Range                                            | 7–9                              | 7–9                             | 9                                  | 8–10                             |
| <i>N</i>                                         | 8                                | 11                              | 4                                  | 5                                |
| <b>Infralabial scales (IL)</b>                   |                                  |                                 |                                    |                                  |
| Mean                                             | 6.9                              | 7                               | 7                                  | 7.4                              |
| SD                                               | ±0.64                            | ±0.63                           | 0                                  | ±0.55                            |
| Range                                            | 6–8                              | 6–8                             | 7                                  | 7 or 8                           |
| <i>N</i>                                         | 8                                | 11                              | 4                                  | 5                                |
| <b>Paravertebral tubercles (PVT)</b>             |                                  |                                 |                                    |                                  |
| Mean                                             | 33.1*                            | 29.4*                           | 29                                 | 26.8                             |
| SD                                               | ±1.36                            | ±1.86                           | ±0.82                              | ±1.30                            |
| Range                                            | 31–35                            | 25–33                           | 28–30                              | 25–28                            |
| <i>N</i>                                         | 8                                | 11                              | 4                                  | 5                                |
| <b>Longitudinal rows of body tubercles (LRT)</b> |                                  |                                 |                                    |                                  |
| Mean                                             | 18.9*                            | 16.4*                           | 13.5                               | 13.3                             |
| SD                                               | ±0.99                            | ±1.36                           | ±1.00                              | ±0.58                            |
| Range                                            | 18–21                            | 13–18                           | 12–14                              | 12–14                            |
| <i>N</i>                                         | 8                                | 11                              | 4                                  | 16                               |
| <b>Ventral scales (VS)</b>                       |                                  |                                 |                                    |                                  |
| Mean                                             | 37.3                             | 39.7                            | 35.5                               | 37.3                             |
| SD                                               | ±2.71                            | ±2.37                           | ±1.91                              | ±2.05                            |
| Range                                            | 33–40                            | 34–42                           | 34–38                              | 35–41                            |
| <i>N</i>                                         | 8                                | 11                              | 4                                  | 16                               |
| <b>Expanded fourth toe lamellae (4TLE)</b>       |                                  |                                 |                                    |                                  |
| Mean                                             | 8.3                              | 8.8                             | 8.25                               | 8.3                              |
| SD                                               | ±0.46                            | ±0.6                            | ±0.96                              | ±0.45                            |
| Range                                            | 8 or 9                           | 8–10                            | 7–9                                | 8 or 9                           |
| <i>N</i>                                         | 8                                | 11                              | 4                                  | 16                               |
| <b>Unmodified fourth toe lamellae (4TLU)</b>     |                                  |                                 |                                    |                                  |
| Mean                                             | 12.4                             | 13.1                            | 12.8                               | 12.7                             |
| SD                                               | ±0.92                            | ±0.54                           | ±0.96                              | ±0.48                            |
| Range                                            | 11–14                            | 12–14                           | 12–14                              | 12 or 13                         |
| <i>N</i>                                         | 8                                | 11                              | 4                                  | 16                               |



Table 8. *Continued*

|                                                                | <i>linnwayensis</i> group        |                                 | <i>sadansineensis</i> group        |                                |                                  |
|----------------------------------------------------------------|----------------------------------|---------------------------------|------------------------------------|--------------------------------|----------------------------------|
|                                                                | <i>shwetaungorum</i><br>sp. nov. | <i>linnwayensis</i><br>sp. nov. | <i>pharphaungensis</i><br>sp. nov. | <i>sampelensis</i><br>sp. nov. | <i>sadansinensis</i><br>sp. nov. |
| Light caudal bands (LCB)                                       |                                  |                                 |                                    |                                |                                  |
| Mean                                                           | 8.3                              | 8.2                             | 7.3                                | 8.3                            | 10                               |
| SD                                                             | ±0.58                            | ±0.45                           | ±1.15                              | ±1.11                          | ±1.00                            |
| Range                                                          | 8 or 9                           | 8 or 9                          | 6–8                                | 7–10                           | 9–11                             |
| <i>N</i>                                                       | 3                                | 9                               | 3                                  | 6                              | 2                                |
| Dark caudal bands (DCB)                                        |                                  |                                 |                                    |                                |                                  |
| Mean                                                           | 8.3                              | 8.4                             | 8.3                                | 8.1                            | 9                                |
| SD                                                             | ±1.15                            | ±0.55                           | ±1.15                              | ±1.35                          | ±1.00                            |
| Range                                                          | 7–9                              | 8 or 9                          | 7–9                                | 7–10                           | 8–10                             |
| <i>N</i>                                                       | 3                                | 9                               | 3                                  | 6                              | 2                                |
| Morphology                                                     |                                  |                                 |                                    |                                |                                  |
| Body tubercles low, weakly keeled                              | Yes                              | Yes                             | Variable                           | Yes                            | Yes                              |
| Body tubercles raised, moderately to strongly keeled           | No                               | No                              | Variable                           | No                             | No                               |
| Tubercles extend beyond base of tail                           | No                               | No                              | No                                 | No                             | No                               |
| Enlarged femoral and precloacal scales continuous              | Yes                              | Yes                             | Yes                                | No                             | No                               |
| Pore-bearing femoral and precloacal scales continuous          | No                               | No                              | No                                 | No                             | No                               |
| Enlarged proximal femoral scales ~ 1/2 size of distal femorals | No                               | No                              | No                                 | No                             | No                               |
| Medial subcaudal scales two or three times wider than long     | 2                                | 2                               | 3                                  | 3                              | 3                                |
| Medial subcaudal extend onto lateral surface of tail           | No                               | No                              | Yes                                | Yes                            | Yes                              |
| Colour pattern                                                 |                                  |                                 |                                    |                                |                                  |
| Nuchal loop divided medially                                   | No                               | 1(Yes),10(No)                   | No                                 | No                             | No                               |
| Nuchal loop with anterior azygous notch                        | No                               | Yes                             | No                                 | No                             | No                               |
| Posterior border of nuchal loop                                | Straight                         | Usually straight                | Straight                           | Straight/sinuuous              | Sinuuous                         |

Table 8. Continued

|                                                        | <i>linnwayensis</i> group        |                                 | <i>sadansineensis</i> group        |                                |                                  |
|--------------------------------------------------------|----------------------------------|---------------------------------|------------------------------------|--------------------------------|----------------------------------|
|                                                        | <i>shuetaungorum</i><br>sp. nov. | <i>linnwayensis</i><br>sp. nov. | <i>pharpbaungensis</i><br>sp. nov. | <i>sanpelensis</i><br>sp. nov. | <i>sadansinensis</i><br>sp. nov. |
| Band on nape                                           | No                               | No                              | Yes                                | Yes                            | Yes                              |
| Dorsal banding with paravertebral elements             | No                               | No                              | No                                 | No                             | No                               |
| Dorsal bands wider than interspaces                    | Yes                              | Variable                        | Same or no                         | Same or no                     | Same or no                       |
| Dorsal bands bearing lightened centres                 | Yes                              | Yes                             | Yes                                | Yes                            | Yes                              |
| Dorsal bands edged with light-coloured tubercles       | Yes                              | Yes                             | No                                 | No                             | No                               |
| Shape of dorsal bands                                  | Regular                          | Variable                        | Regular                            | Regular                        | Regular                          |
| Dark markings in dorsal interspaces                    | Yes                              | Yes                             | Yes                                | Yes                            | Yes                              |
| Ventrolateral body fold whitish                        | No                               | No                              | Variable                           | Yes                            | No                               |
| Top of head diffusely mottled, blotched or patternless | Blotched                         | Blotched                        | Mottled                            | Mottled                        | Mottled                          |
| Light reticulum on top of head                         | Yes                              | Yes                             | No                                 | No                             | No                               |
| Anterodorsal margin of thighs darkly pigmented         | Yes                              | Yes                             | No                                 | No                             | Yes                              |
| Anterodorsal margin of brachia darkly pigmented        | Yes                              | Yes                             | Variable                           | No                             | Yes                              |
| Light caudal bands bearing dark markings               | No                               | 5(Yes)1(No)                     | Yes                                | Yes                            | Yes                              |
| Light caudal bands encircle tail                       | Yes                              | Variable                        | No                                 | No                             | No                               |
| Dark caudal bands wider than light caudal bands        | Yes                              | Yes                             | Variable                           | Yes                            | Same or no                       |
| Mature regenerated tail spotted                        | No                               | Yes                             | /                                  | No                             | No                               |
| Maximum SVL (mm)                                       | 102.2                            | 101.7                           | 70.4                               | 73.9                           | 69.6                             |

**Table 8.** *Continued*

|                                                  | <i>sinyyneensis</i> group         |                             |                                 | <i>yathepyanensis</i> group     |                               |                               |                                   |
|--------------------------------------------------|-----------------------------------|-----------------------------|---------------------------------|---------------------------------|-------------------------------|-------------------------------|-----------------------------------|
|                                                  | <i>dammathetensis</i><br>sp. nov. | <i>aequalis</i><br>sp. nov. | <i>sinyyneensis</i><br>sp. nov. | <i>welpyanensis</i><br>sp. nov. | <i>linnoensis</i><br>sp. nov. | <i>sadanensis</i><br>sp. nov. | <i>yathepyanensis</i><br>sp. nov. |
| <b>Summary statistics</b>                        |                                   |                             |                                 |                                 |                               |                               |                                   |
| <b>Supralabial scales (SL)</b>                   |                                   |                             |                                 |                                 |                               |                               |                                   |
| Mean                                             | 9                                 | 8                           | 9.7                             | 8.3                             | 9.5                           | 10.4                          | 9.6                               |
| SD                                               | 0                                 | 0                           | ±0.58                           | ±0.6                            | ±0.52                         | ±0.51                         | ±0.55                             |
| Range                                            | 9                                 | 8                           | 9 or 10                         | 8 or 9                          | 9 or 10                       | 10 or 11                      | 9 or 10                           |
| <i>N</i>                                         | 3                                 | 1                           | 3                               | 3                               | 11                            | 15                            | 5                                 |
| <b>Infralabial scales (IL)</b>                   |                                   |                             |                                 |                                 |                               |                               |                                   |
| Mean                                             | 7.7                               | 6                           | 8                               | 7                               | 7.3                           | 8                             | 8.4                               |
| SD                                               | ±0.58                             | 0                           | 0                               | 0                               | ±0.47                         | ±0.53                         | ±0.55                             |
| Range                                            | 7 or 8                            | 6                           | 8                               | 7                               | 7 or 8                        | 7–9                           | 8 or 9                            |
| <i>N</i>                                         | 3                                 | 1                           | 3                               | 3                               | 11                            | 15                            | 5                                 |
| <b>Paravertebral tubercles (PVT)</b>             |                                   |                             |                                 |                                 |                               |                               |                                   |
| Mean                                             | 31.7                              | 36                          | 33.7                            | 31.7                            | 26.3                          | 31.5                          | 31.6                              |
| SD                                               | ±1.15                             | 0                           | ±1.2                            | ±1.5                            | ±0.47                         | ±1.13                         | ±0.55                             |
| Range                                            | 31–33                             | 36                          | 33–35                           | 30–33                           | 26 or 27                      | 30–33                         | 31 or 32                          |
| <i>N</i>                                         | 3                                 | 1                           | 3                               | 3                               | 11                            | 15                            | 5                                 |
| <b>Longitudinal rows of body tubercles (LRT)</b> |                                   |                             |                                 |                                 |                               |                               |                                   |
| Mean                                             | 14.3                              | 19                          | 15                              | 16                              | 13.5                          | 14.3                          | 18.4                              |
| SD                                               | ±1.15                             | 0                           | 0                               | 0                               | ±0.82                         | ±0.70                         | ±0.55                             |
| Range                                            | 13–15                             | 19                          | 15                              | 16                              | 13–15                         | 13–15                         | 18 or 19                          |
| <i>N</i>                                         | 3                                 | 1                           | 3                               | 3                               | 11                            | 15                            | 5                                 |
| <b>Ventral scales (VS)</b>                       |                                   |                             |                                 |                                 |                               |                               |                                   |
| Mean                                             | 26.7                              | 19                          | 28                              | 29.3                            | 36.9                          | 32.0                          | 30.6                              |
| SD                                               | ±1.53                             | 0                           | ±1.0                            | ±1.2                            | ±1.04                         | ±1.73                         | ±0.89                             |
| Range                                            | 25–28                             | 19                          | 27–29                           | 28–30                           | 35–38                         | 30–35                         | 30–32                             |
| <i>N</i>                                         | 3                                 | 1                           | 3                               | 3                               | 11                            | 15                            | 5                                 |
| <b>Expanded fourth toe lamellae (4TLE)</b>       |                                   |                             |                                 |                                 |                               |                               |                                   |
| Mean                                             | 8.7                               | 9                           | 9                               | 8                               | 9.3                           | 8.5                           | 8.8                               |
| SD                                               | ±0.58                             | 0                           | ±1.0                            | 0                               | ±0.47                         | ±0.74                         | ±0.45                             |
| Range                                            | 8 or 9                            | 9                           | 8–10                            | 8                               | 9 or 10                       | 7–9                           | 8 or 9                            |
| <i>N</i>                                         | 3                                 | 1                           | 3                               | 3                               | 11                            | 15                            | 5                                 |
| <b>Unmodified fourth toe lamellae (4TLU)</b>     |                                   |                             |                                 |                                 |                               |                               |                                   |
| Mean                                             | 12.3                              | 13                          | 11.3                            | 12                              | 13.9                          | 13.7                          | 13.2                              |
| SD                                               | ±0.58                             | 0                           | ±0.58                           | ±1.0                            | ±0.3                          | ±0.49                         | ±0.84                             |
| Range                                            | 12 or 13                          | 13                          | 11 or 12                        | 11–13                           | 13 or 14                      | 13 or 14                      | 12–14                             |
| <i>N</i>                                         | 3                                 | 1                           | 3                               | 3                               | 11                            | 15                            | 5                                 |

Table 8. Continued

|                                  | <i>sinyineensis</i> group         |                                             |                                 | <i>yathepyanensis</i> group   |                               |                                   |
|----------------------------------|-----------------------------------|---------------------------------------------|---------------------------------|-------------------------------|-------------------------------|-----------------------------------|
|                                  | <i>dammathetensis</i><br>sp. nov. | <i>aequalis</i><br>sinyineensis<br>sp. nov. | <i>welpyanensis</i><br>sp. nov. | <i>linnoensis</i><br>sp. nov. | <i>sadanensis</i><br>sp. nov. | <i>yathepyanensis</i><br>sp. nov. |
| Total fourth toe lamellae (4TL)  |                                   |                                             |                                 |                               |                               |                                   |
| Mean                             | 21.0                              | 22                                          | 20                              | 23.2                          | 22.1                          | 22                                |
| SD                               | 0                                 | ±1.6                                        | ±1.0                            | ±0.6                          | ±0.74                         | ±1.22                             |
| Range                            | 21                                | 19–21                                       | 19–21                           | 22–24                         | 21–23                         | 20–23                             |
| N                                | 3                                 | 3                                           | 3                               | 11                            | 15                            | 5                                 |
| Enlarged femoral scales (FS)     |                                   |                                             |                                 |                               |                               |                                   |
| Mean                             | 33.0                              | 25                                          | 30.3                            | 24.1                          | 37.9                          | 30.6                              |
| SD                               | ±2.65                             | 0                                           | ±0.58                           | ±9.33                         | ±2.22                         | ±3.71                             |
| Range                            | 31–36                             | 25                                          | 30–31                           | 12–37                         | 34–41                         | 25–34                             |
| N                                | 3                                 | 1                                           | 3                               | 11                            | 15                            | 5                                 |
| Femoral pores (FP)               |                                   |                                             |                                 |                               |                               |                                   |
| Mean                             | 36.0                              | 13                                          | 20                              | 12.8                          | 12.0                          | 14                                |
| SD                               | 0                                 | 0                                           | 0                               | ±1.04                         | 0                             | 0                                 |
| Range                            | 36                                | 13                                          | 20                              | 12–14                         | 12                            | 14                                |
| N                                | 1                                 | 1                                           | 2                               | 8                             | 3                             | 1                                 |
| Enlarged precloacal scales (PS)  |                                   |                                             |                                 |                               |                               |                                   |
| Mean                             | 8.3                               | 5                                           | 12                              | 11.5                          | 11.9                          | 10.8                              |
| SD                               | ±0.58                             | 0                                           | ±1.0                            | ±1.44                         | ±0.80                         | ±1.3                              |
| Range                            | 8 or 9                            | 5                                           | 11–13                           | 9–13                          | 10–13                         | 10–13                             |
| N                                | 3                                 | 1                                           | 3                               | 11                            | 15                            | 5                                 |
| Precloacal pores (PP)            |                                   |                                             |                                 |                               |                               |                                   |
| Mean                             | 9                                 | 5                                           | 7.5                             | 5.1                           | 2.3                           | 6                                 |
| SD                               | 0                                 | 0                                           | ±0.5                            | ±0.39                         | ±1.15                         | 0                                 |
| Range                            | 9                                 | 5                                           | 7 or 8                          | 4–6                           | 2 or 3                        | 6                                 |
| N                                | 1                                 | 1                                           | 2                               | 8                             | 3                             | 1                                 |
| Post-precloacal scale rows (PPS) |                                   |                                             |                                 |                               |                               |                                   |
| Mean                             | 3.0                               | 3                                           | 3                               | 3.2                           | 3.0                           | 3                                 |
| SD                               | 0                                 | 0                                           | 0                               | ±0.4                          | 0                             | 0                                 |
| Range                            | 3                                 | 3                                           | 3                               | 3 or 4                        | 3                             | 3                                 |
| N                                | 3                                 | 1                                           | 3                               | 11                            | 15                            | 5                                 |
| Body bands (BB)                  |                                   |                                             |                                 |                               |                               |                                   |
| Mean                             | 5.0                               | 5.5                                         | 6                               | 5.9                           | 5.5                           | 5                                 |
| SD                               | 0                                 | ±0.71                                       | 0                               | ±0.3                          | ±0.52                         | ±0.45                             |
| Range                            | 5                                 | 5 or 6                                      | 6                               | 5 or 6                        | 5 or 6                        | 4–6                               |
| N                                | 3                                 | 1                                           | 3                               | 11                            | 15                            | 11                                |

Table 8. *Continued*

|                                                               | <i>sinyineensis</i> group         |                             |                                 | <i>yathepyanensis</i> group     |                               |                               |                                   |
|---------------------------------------------------------------|-----------------------------------|-----------------------------|---------------------------------|---------------------------------|-------------------------------|-------------------------------|-----------------------------------|
|                                                               | <i>dammathetensis</i><br>sp. nov. | <i>aequalis</i><br>sp. nov. | <i>sinyineensis</i><br>sp. nov. | <i>welpyanensis</i><br>sp. nov. | <i>linnoensis</i><br>sp. nov. | <i>sadanensis</i><br>sp. nov. | <i>yathepyanensis</i><br>sp. nov. |
| Light caudal bands (LCB)                                      |                                   |                             |                                 |                                 |                               |                               |                                   |
| Mean                                                          | 10.3                              | 9                           | 9                               | 9                               | 15                            | 16                            | 13                                |
| SD                                                            | ±0.71                             | 0                           | 0                               | 0                               | 0                             | 0                             | 0                                 |
| Range                                                         | 10 or 11                          | 9                           | 9                               | 9                               | 15                            | 16                            | 13                                |
| <i>N</i>                                                      | 3                                 | 1                           | 1                               | 1                               | 1                             | 2                             | 1                                 |
| Dark caudal bands (DCB)                                       |                                   |                             |                                 |                                 |                               |                               |                                   |
| Mean                                                          | 10.7                              | 9                           | 9                               | 10                              | 14                            | 17                            | 13                                |
| SD                                                            | ±0.71                             | 0                           | 0                               | 0                               | 0                             | 0                             | 0                                 |
| Range                                                         | 10 or 11                          | 9                           | 9                               | 10                              | 14                            | 17                            | 13                                |
| <i>N</i>                                                      | 3                                 | 1                           | 1                               | 1                               | 1                             | 2                             | 1                                 |
| Morphology                                                    |                                   |                             |                                 |                                 |                               |                               |                                   |
| Body tubercles low, weakly keeled                             | No                                | No                          | No                              | No                              | No                            | No                            | No                                |
| Body tubercles raised, moderately to strongly keeled          | Yes                               | Yes                         | Yes                             | Yes                             | Yes                           | Yes                           | Yes                               |
| Tubercles extend beyond base of tail                          | Yes                               | Yes                         | Yes                             | No                              | Yes                           | Yes                           | Yes                               |
| Enlarged femoral and precloacal scales continuous             | Yes                               | Yes                         | Yes                             | Yes                             | Variable                      | No                            | Yes                               |
| Pore-bearing femoral and precloacal scales continuous         | Yes                               | No                          | No                              | No                              | No                            | No                            | No                                |
| Enlarged proximal femoral scales ~1/2 size of distal femorals | Yes                               | No                          | No                              | No                              | Yes                           | Yes                           | Yes                               |
| Medial subcaudal scales two or three times wider than long    | 3                                 | 2                           | 2                               | 2                               | 2                             | 3                             | 3                                 |
| Medial subcaudal extend onto lateral surface of tail          | Yes                               | No                          | No                              | No                              | Yes                           | Yes                           | Yes                               |
| Colour pattern                                                |                                   |                             |                                 |                                 |                               |                               |                                   |
| Nuchal loop divided medially                                  | Variable                          | Yes                         | No                              | No                              | Variable                      | No                            | No                                |
| Nuchal loop with anterior azygous notch                       | No                                | No                          | No                              | No                              | No                            | No                            | No                                |
| Posterior border of nuchal loop                               | Jagged                            | Straight                    | Jagged                          | Jagged                          | Variable                      | Variable                      | Variable                          |
| Band on nape                                                  | Yes                               | Yes                         | Yes                             | Yes                             | Yes                           | Yes                           | Yes                               |

Table 8. Continued

|                                                        | <i>sinycineensis</i> group        |                             |                                  | <i>yathepyanensis</i> group     |                               |                               |                                   |
|--------------------------------------------------------|-----------------------------------|-----------------------------|----------------------------------|---------------------------------|-------------------------------|-------------------------------|-----------------------------------|
|                                                        | <i>dammathetensis</i><br>sp. nov. | <i>aequalis</i><br>sp. nov. | <i>sinycineensis</i><br>sp. nov. | <i>welpyanensis</i><br>sp. nov. | <i>linnoensis</i><br>sp. nov. | <i>sadanensis</i><br>sp. nov. | <i>yathepyanensis</i><br>sp. nov. |
| Dorsal banding with paravertebral elements             | Yes                               | Yes                         | No                               | No                              | No                            | No                            | No                                |
| Dorsal bands wider than interspaces                    | Yes                               | Yes                         | Yes                              | Yes                             | Yes                           | No                            | Same                              |
| Dorsal bands bearing lightened centres                 | No                                | No                          | Weak                             | No                              | Faint                         | Faint                         | No                                |
| Dorsal bands edged with light-coloured tubercles       | No                                | Yes                         | Yes                              | No                              | Yes                           | Partly                        | Yes                               |
| Shape of dorsal bands                                  | Jagged                            | /                           | Jagged                           | Jagged                          | Jagged                        | Weakly jagged                 | Regular                           |
| Dark markings in dorsal interspaces                    | Yes                               | No                          | Yes                              | Yes                             | Yes                           | Yes                           | Yes                               |
| Ventrolateral body fold whitish                        | Faintly                           | No                          | No                               | Yes                             | Yes                           | Faint                         | Yes                               |
| Top of head diffusely mottled, blotched or patternless | Mottled                           | No                          | Mottled                          | Mottled                         | Mottled                       | Mottled                       | Mottled                           |
| Light reticulum on top of head                         | No                                | Mottled                     | No                               | No                              | No                            | No                            | No                                |
| Anterodorsal margin of thighs darkly pigmented         | Yes                               | Yes                         | Yes                              | Yes                             | No                            | No to faint                   | Yes                               |
| Anterodorsal margin of brachia darkly pigmented        | Yes                               | Yes                         | Yes                              | Yes                             | Faint to yes                  | Variable                      | Yes                               |
| Light caudal bands bearing dark markings               | No                                | No                          | Yes                              | Yes                             | Yes                           | Yes                           | Yes                               |
| Light caudal bands encircle tail                       | No                                | Yes                         | No                               | No                              | No                            | No                            | No                                |
| Dark caudal bands wider than light caudal bands        | Yes                               | No                          | Yes                              | Yes                             | Yes                           | Same or yes                   | Yes                               |
| Mature regenerated tail spotted                        | /                                 | Yes                         | No                               | No                              | No                            | No                            | No                                |
| Maximum SVL (mm)                                       | 69.3                              | 87.0                        | 91.6                             | 70.6                            | 78.0                          | 73.8                          | 72.7                              |

SD, standard deviation; N, sample size.  
\*Significant statistical differences between means.



**Table 9.** Meristic, mensural and colour pattern data from the type series of *Cyrtodactylus linnuayeneis* sp. nov.

| Locality                                                      | LSUHC 12983   | LSUHC 12984   | BYU 52214     | LSUHC 12986   | LSUHC 12980 | LSUHC 12981 | BYU 52213 | LSUHC 12970 | LSUHC 12971 | LSUHC 12972 | LSUHC 12973 |
|---------------------------------------------------------------|---------------|---------------|---------------|---------------|-------------|-------------|-----------|-------------|-------------|-------------|-------------|
|                                                               | holotype      | paratype      | paratype      | paratype      | paratype    | paratype    | paratype  | paratype    | paratype    | paratype    | paratype    |
|                                                               | Yum Twing Gyi | Yum Twing Gyi | Yum Twing Gyi | Yum Twing Gyi | Lay Htwat   | Lay Htwat   | Lay Htwat | Yae Htwat   | Yae Htwat   | Yae Htwat   | Yae Htwat   |
| Sex                                                           | M             | M             | M             | F             | M           | M           | M         | M           | M           | F           | M           |
| Supralabials                                                  | 7             | 9             | 7             | 9             | 8           | 8           | 8         | 7           | 7           | 9           | 9           |
| Infralabials                                                  | 7             | 7             | 7             | 6             | 7           | 7           | 8         | 7           | 6           | 8           | 7           |
| Body tubercles low, weakly keeled                             | Yes           | Yes           | Yes           | Yes           | Yes         | Yes         | Yes       | Yes         | Yes         | Yes         | Yes         |
| Body tubercles raised, moderately to strongly keeled          | No            | No            | No            | No            | No          | No          | No        | No          | No          | No          | No          |
| Paravertebral tubercles                                       | 29            | 29            | 29            | 29            | 30          | 30          | 30        | 30          | 25          | 33          | 29          |
| Longitudinal rows of body tubercles                           | 13            | 16            | 16            | 17            | 17          | 17          | 17        | 15          | 17          | 18          | 17          |
| Tubercles extend beyond base of tail                          | No            | No            | No            | No            | No          | No          | No        | No          | No          | No          | No          |
| Ventral scales                                                | 42            | 39            | 38            | 40            | 42          | 39          | 39        | 42          | 34          | 41          | 41          |
| Expanded subdigital lamellae on fourth toe                    | 10            | 9             | 9             | 9             | 9           | 9           | 8         | 8           | 9           | 9           | 8           |
| Unmodified subdigital lamellae on fourth toe                  | 13            | 12            | 13            | 14            | 13          | 13          | 13        | 13          | 13          | 13          | 14          |
| Total subdigital lamellae on fourth toe                       | 23            | 21            | 22            | 23            | 22          | 22          | 21        | 21          | 22          | 22          | 22          |
| Enlarged femoral scales (R/L)                                 | 14RL          | 13RL          | 14RL          | 14R/13        | 15RL        | 11R13L      | 13RL      | 15R12L      | 16R14L      | 17R15L      | 14RL        |
| Femoral pores (R/L)                                           | 11R10L        | 9R8L          | 5RL           | /             | 10R9L       | /           | 7RL       | /           | 11R11L      | /           | 10R10L      |
| Enlarged precolocal scales                                    | 12            | 11            | 10            | 9             | 10          | 11          | 9         | 12          | 10          | 10          | 12          |
| Precloacal pores                                              | 10            | 8             | 6             | /             | 8           | 7           | 8         | 9           | 10          | /           | 9           |
| Post-precloacal scales rows                                   | 4             | 4             | 4             | 4             | 4           | 4           | 4         | 4           | 4           | 4           | 4           |
| Enlarged femoral and pre-cloacal scales continuous            | Yes           | Yes           | Yes           | Yes           | Yes         | Yes         | Yes       | Yes         | Yes         | Yes         | Yes         |
| Pore-bearing femoral and pre-cloacal scales continuous        | No            | No            | No            | No            | No          | No          | No        | No          | No          | No          | No          |
| Enlarged proximal femoral scales ~1/2 size of distal femorals | No            | No            | No            | No            | No          | No          | No        | No          | No          | No          | No          |
| Medial subcaudals two or three times wider than long          | 2             | 2             | 2             | 2             | 2           | 2           | 2         | 2           | /           | 2           | 2           |

Table 9. Continued

| Locality                                               | LSUHC 12983 holotype | LSUHC 12984 paratype | BYU 52214 paratype | LSUHC 12986 paratype | LSUHC 12980 paratype | LSUHC 12981 paratype | BYU 52213 paratype | LSUHC 12970 paratype | LSUHC 12971 paratype | LSUHC 12972 paratype | LSUHC 12973 paratype |
|--------------------------------------------------------|----------------------|----------------------|--------------------|----------------------|----------------------|----------------------|--------------------|----------------------|----------------------|----------------------|----------------------|
|                                                        | Yum Twing Gyi        | Yum Twing Gyi        | Yum Twing Gyi      | Yum Twing Gyi        | Lay Htwat            | Lay Htwat            | Lay Htwat          | Yae Htwat            | Yae Htwat            | Yae Htwat            | Yae Htwat            |
| Medial subcaudals extend onto lateral surface of tail  | No                   | No                   | No                 | No                   | No                   | No                   | No                 | No                   | No                   | No                   | No                   |
| Nuchal loop divided medially                           | No                   | Yes                  | No                 | No                   | No                   | No                   | No                 | No                   | No                   | No                   | No                   |
| Nuchal loop with anterior azygous notch                | Yes                  | Yes                  | Yes                | Yes                  | Yes                  | Yes                  | Yes                | Yes                  | Yes                  | Yes                  | Yes                  |
| Posterior border of nuchal loop                        | Straight             | Straight             | Straight           | Straight             | Straight             | Straight             | Straight           | Straight             | Sinuuous             | Straight             | Straight             |
| Band on nape                                           | No                   | No                   | No                 | No                   | No                   | No                   | No                 | No                   | No                   | No                   | No                   |
| Dorsal banding with paravertebral elements             | No                   | No                   | No                 | No                   | No                   | No                   | No                 | No                   | No                   | No                   | No                   |
| Number of body bands                                   | 3                    | 4                    | 4                  | 3                    | 3                    | 4                    | 3                  | 4                    | 3                    | 4                    | 4                    |
| Dorsal bands wider than interspaces                    | Yes                  | Same                 | Yes                | No                   | No                   | Yes                  | Yes                | Yes                  | Yes                  | Yes                  | Yes                  |
| Dorsal bands bearing lightened centres                 | Yes                  | Yes                  | Yes                | Yes                  | Yes                  | Yes                  | Yes                | Yes                  | Yes                  | Yes                  | Yes                  |
| Dorsal bands edged with light tubercles                | Yes                  | Yes                  | Yes                | Yes                  | Yes                  | Yes                  | Yes                | Yes                  | Yes                  | Yes                  | Yes                  |
| Dorsal band borders                                    | Variable             | Smooth               | Smooth             | Variable             | Variable             | Smooth               | Smooth             | Smooth               | Variable             | Smooth               | Smooth               |
| Dark markings in dorsal interspaces                    | Yes                  | Yes                  | Yes                | Yes                  | Yes                  | Yes                  | Yes                | Yes                  | Yes                  | Yes                  | Yes                  |
| Ventrolateral body fold whitish                        | No                   | No                   | No                 | No                   | No                   | No                   | No                 | No                   | No                   | No                   | No                   |
| Top of head diffusely mottled, blotched or patternless | Blotched             | Blotched             | Blotched           | Blotched             | Blotched             | Blotched             | Blotched           | Blotched             | Blotched             | Blotched             | Blotched             |
| Light reticulum on top of head                         | Yes                  | Yes                  | Yes                | Yes                  | Yes                  | Yes                  | Yes                | Yes                  | Yes                  | Yes                  | Yes                  |
| Anterodorsal margin of thighs darkly pigmented         | Yes                  | Yes                  | Yes                | Yes                  | Yes                  | Yes                  | Yes                | Yes                  | Yes                  | Yes                  | Yes                  |
| Anterodorsal margin of brachia darkly pigmented        | Yes                  | Yes                  | Yes                | Yes                  | Yes                  | Yes                  | Yes                | Yes                  | Yes                  | Yes                  | Yes                  |
| Light caudal bands bearing dark markings               | Yes                  | Yes                  | /                  | /                    | /                    | No                   | Yes                | Yes                  | /                    | /                    | Yes                  |

**Table 9.** *Continued*

| Locality                                        | LSUHC 12983 |          | LSUHC 12984 |       | BYU 52214 |       | LSUHC 12986 |       | LSUHC 12980 |       | LSUHC 12981 |       | BYU 52213 |       | LSUHC 12970 |       | LSUHC 12971 |       | LSUHC 12972 |       | LSUHC 12973 |       |      |
|-------------------------------------------------|-------------|----------|-------------|-------|-----------|-------|-------------|-------|-------------|-------|-------------|-------|-----------|-------|-------------|-------|-------------|-------|-------------|-------|-------------|-------|------|
|                                                 | holotype    | paratype | Yum         | Twing | Yum       | Twing | Yum         | Twing | Lay         | Htwat | Lay         | Htwat | Lay       | Htwat | Lay         | Htwat | Yae         | Htwat | Yae         | Htwat | Yae         | Htwat | Yae  |
| Light caudal bands                              | No          | No       | /           | /     | /         | /     | /           | /     | /           | No    | No          | No    | No        | No    | Yes         | Yes   | /           | /     | /           | /     | /           | /     | Yes  |
| encircle tail                                   |             |          |             |       |           |       |             |       |             |       |             |       |           |       |             |       |             |       |             |       |             |       |      |
| Number of light caudal bands                    | /           | 8        | /           | /     | /         | /     | /           | /     | /           | /     | 9           | 9     | 8         | 8     | 8           | 8     | 8           | 8     | 8           | 8     | 8           | 8     | 8    |
| Number of dark caudal bands                     | /           | 9        | /           | /     | /         | /     | /           | /     | /           | /     | 9           | 9     | 8         | 8     | 8           | 8     | 8           | 8     | 8           | 8     | 8           | 8     | 8    |
| Dark caudal bands wider than light caudal bands | Yes         | Yes      | /           | /     | /         | /     | /           | /     | /           | Yes   | Yes         | Yes   | Yes       | Yes   | Yes         | Yes   | Yes         | Yes   | Yes         | Yes   | Yes         | Yes   | Yes  |
| Mature regenerated tail spotted                 | Yes         | /        | Yes         | /     | Yes       | /     | Yes         | /     | Yes         | /     | /           | /     | /         | /     | /           | /     | Yes         | Yes   | /           | Yes   | Yes         | /     | /    |
| SVL                                             | 101.5       | 92.3     | 100.2       | 99.7  | 101.3     | 99.7  | 101.3       | 99.7  | 101.3       | 62.5  | 62.5        | 62.5  | 81.5      | 81.5  | 61.2        | 61.2  | 101.7       | 101.7 | 98.1        | 98.1  | 98.1        | 68.5  | 68.5 |
| TL                                              | 97r         | 108.0    | 100r        | 12b   | 74r       | 12b   | 74r         | 12b   | 74r         | 72r   | 72r         | 72r   | 97.0      | 97.0  | /           | /     | 69r         | 69r   | 86r         | 86r   | 86r         | 80.0  | 80.0 |
| TW                                              | 9.7         | 9.5      | 9.5         | 9.5   | 11.6      | 9.5   | 11.6        | 9.5   | 11.6        | 6.1   | 6.1         | 6.1   | 7.9       | 7.9   | 5.7         | 5.7   | 11.5        | 11.5  | 9.4         | 9.4   | 9.4         | 6.6   | 6.6  |
| FL                                              | 16.7        | 15.0     | 16.7        | 15.7  | 15.8      | 15.7  | 15.8        | 15.7  | 15.8        | 10.6  | 10.6        | 10.6  | 13.4      | 13.4  | 10.2        | 10.2  | 17.2        | 17.2  | 16.5        | 16.5  | 16.5        | 12.1  | 12.1 |
| TBL                                             | 19.0        | 17.6     | 17.1        | 18.6  | 19.9      | 18.6  | 19.9        | 18.6  | 19.9        | 11.5  | 11.5        | 11.5  | 15.1      | 15.1  | 11.7        | 11.7  | 20.3        | 20.3  | 19.0        | 19.0  | 19.0        | 12.8  | 12.8 |
| AG                                              | 44.0        | 39.7     | 43.6        | 45.1  | 42.0      | 45.1  | 42.0        | 45.1  | 42.0        | 26.9  | 26.9        | 26.9  | 33.8      | 33.8  | 25.1        | 25.1  | 42.3        | 42.3  | 42.1        | 42.1  | 42.1        | 28.5  | 28.5 |
| HL                                              | 28.2        | 25.7     | 27.8        | 28.1  | 29.9      | 28.1  | 29.9        | 28.1  | 29.9        | 19.2  | 19.2        | 19.2  | 23.5      | 23.5  | 18.6        | 18.6  | 27.9        | 27.9  | 28.3        | 28.3  | 28.3        | 21.8  | 21.8 |
| HW                                              | 20.4        | 18.3     | 20.3        | 20.1  | 21.8      | 20.1  | 21.8        | 20.1  | 21.8        | 12.8  | 12.8        | 12.8  | 16.0      | 16.0  | 13.1        | 13.1  | 20.3        | 20.3  | 19.7        | 19.7  | 19.7        | 13.9  | 13.9 |
| HD                                              | 11.5        | 11.0     | 11.6        | 12.0  | 13.7      | 12.0  | 13.7        | 12.0  | 13.7        | 7.2   | 7.2         | 7.2   | 9.1       | 9.1   | 7.5         | 7.5   | 11.8        | 11.8  | 11.3        | 11.3  | 11.3        | 8.0   | 8.0  |
| ED                                              | 6.1         | 5.9      | 6.1         | 6.8   | 6.6       | 6.8   | 6.6         | 6.8   | 6.6         | 4.8   | 4.8         | 4.8   | 5.1       | 5.1   | 4.3         | 4.3   | 6.8         | 6.8   | 6.7         | 6.7   | 6.7         | 4.5   | 4.5  |
| EE                                              | 8.1         | 7.3      | 8.3         | 8.2   | 8.0       | 8.2   | 8.0         | 8.2   | 8.0         | 5.6   | 5.6         | 5.6   | 6.2       | 6.2   | 5.1         | 5.1   | 8.1         | 8.1   | 8.0         | 8.0   | 8.0         | 6.4   | 6.4  |
| ES                                              | 12.3        | 10.4     | 12.2        | 11.9  | 11.6      | 11.9  | 11.6        | 11.9  | 11.6        | 8.0   | 8.0         | 8.0   | 9.8       | 9.8   | 7.2         | 7.2   | 12.3        | 12.3  | 11.0        | 11.0  | 11.0        | 8.3   | 8.3  |
| EN                                              | 9.6         | 8.0      | 9.1         | 9.0   | 9.3       | 9.0   | 9.3         | 9.0   | 9.3         | 6.2   | 6.2         | 6.2   | 7.6       | 7.6   | 5.5         | 5.5   | 8.6         | 8.6   | 9.3         | 9.3   | 9.3         | 6.4   | 6.4  |
| IO                                              | 7.8         | 6.3      | 7.3         | 8.2   | 6.7       | 8.2   | 6.7         | 8.2   | 6.7         | 5.2   | 5.2         | 5.2   | 6.4       | 6.4   | 4.5         | 4.5   | 7.3         | 7.3   | 7.8         | 7.8   | 7.8         | 5.3   | 5.3  |
| EL                                              | 2.7         | 2.1      | 2.0         | 2.0   | 8.4       | 2.0   | 8.4         | 2.0   | 8.4         | 2.1   | 2.1         | 2.1   | 2.4       | 2.4   | 0.8         | 0.8   | 3.0         | 3.0   | 2.7         | 2.7   | 2.7         | 1.6   | 1.6  |
| IN                                              | 3.3         | 3.1      | 3.1         | 3.2   | 3.1       | 3.2   | 3.1         | 3.2   | 3.1         | 2.1   | 2.1         | 2.1   | 3.2       | 3.2   | 2.4         | 2.4   | 3.3         | 3.3   | 3.1         | 3.1   | 3.1         | 2.7   | 2.7  |

Abbreviations are listed in the Material and Methods. R, right; L, left; /, data unobtainable; r, regenerated; b, broken.

digital inflection, 12–14 unmodified distal subdigital lamellae and 21–23 total subdigital lamellae; low, weakly keeled, dorsal body tubercles; tubercles not extending beyond base of tail; enlarged femoral and preloacal scales not continuous; 24–32 enlarged femoral scales; enlarged femoral scales nearly equal in size; 10–22 femoral pores in males not continuous with pore-bearing preloacal scales; 9–12 enlarged, preloacal scales; 6–10 preloacal pores in males; four rows of enlarged post-preloacal scales; transverse subcaudal scales twice as wide as long midway down the tail and not extending onto the lateral margins of the tail; top of head bearing dark blotches and light-coloured, reticulum; nuchal loop rarely paired, bearing an anterior, azygous notch, and nearly always having a smooth posterior border; first body band bearing an anterior, azygous notch; no band on nape; three or four dark, variably shaped dorsal bands with no paravertebral elements, bands usually as wide or wider than interspaces bearing lightened centres, edged with light tubercles; dark markings in dorsal interspaces but no light-coloured tubercles; anterodorsal margins of thighs, brachia and ventrolateral fold pigmented; eight or nine light caudal bands bearing dark markings in adults and usually encircling tail; nine dark caudal bands wider than light caudal bands; and mature regenerated tail spotted.

*Description of holotype:* Adult male SVL 101.5 mm; head moderate in length (HL/SVL 0.28), wide (HW/HL 0.72), flat (HD/HL 0.41), distinct from neck, triangular in dorsal profile; lores inflated, prefrontal region concave, canthus rostralis rounded; snout elongate (ES/HL 0.44), rounded in dorsal profile, broad in lateral profile; eye large (ED/HL 0.22); ear opening oval, small (EL/HL 0.10); eye to ear distance greater than diameter of eye; rostral rectangular, partially divided dorsally, bordered posteriorly by left and right supranasals contacting on midline, laterally by first supralabials; external nares bordered anteriorly by rostral, dorsally by supranasal, posteriorly by two postnasals and ventrally by first supralabial; 7(R,L) rectangular supralabials extending to below midpoint of eye; 7(R,L) infralabials tapering posteriorly to below orbit; scales of rostrum and lores slightly raised, much larger than granular scales on top of head and occiput; scales on top of head and occiput intermixed with small tubercles; dorsal superciliaries weakly pointed and directed posteriorly; mental triangular, bordered laterally by first infralabials and posteriorly by large left and right trapezoidal postmentals which contact medially for 70% of their length posterior to mental; two rows of variably enlarged chinshields border all infralabials; gular and throat scales granular, grading posteriorly into larger, subimbricate pectoral and ventral scales.

Body relatively short (AG/SVL 0.43) with well-defined ventrolateral folds; dorsal scales small, raised and interspersed with large, low, semi-regularly arranged, weakly keeled tubercles; tubercles extend from nape to base of tail but no farther; tubercles on nape smaller but sharper than those on posterior portion of body and less strongly keeled; 29 paravertebral tubercles; approximately 13 longitudinal rows of dorsal tubercles; 42 flat, subimbricate, ventral scales larger than dorsal scales; enlarged femoral and preloacal scales continuous; 28 enlarged, femoral scales; 21 femoral pores; 12 enlarged preloacal scales; ten preloacal pores; four rows of large, post-preloacal scales; and no deep preloacal groove or depression.

Forelimbs moderate in stature, relatively short (FL/SVL 0.16); slightly raised, juxtaposed scales of forearm larger than those on body, intermixed with tubercles; palmar scales flat; digits well-developed, relatively long, inflected at basal, interphalangeal joints; digits much more narrow distal to inflections; widened proximal subdigital lamellae do not extend onto palm; claws well-developed, sheathed by a dorsal and ventral scale at base; hindlimbs more robust than forelimbs, moderate in length (TBL/SVL 0.19), covered dorsally by small, raised, juxtaposed scales intermixed with large tubercles and bearing flat, slightly larger scales anteriorly; ventral femoral scales imbricate, larger than dorsals; one row of 14(R,L) enlarged femoral scales in contact with enlarged preloacal scales; enlarged femoral scales nearly equal in size; 11(R)10(L) femoral pores; small, postfemoral scales form an abrupt union with larger, flat ventral scales of posteroventral margin of thigh; subtibial scales flat, imbricate; plantar scales flat; digits relatively long, well-developed, inflected at basal, interphalangeal joints; 10(R,L) transversely expanded subdigital lamellae on fourth toe proximal to joint inflection that do not extend onto sole, 13(R,L) unmodified subdigital lamellae distal to inflection; and claws well-developed, base of claw sheathed by a dorsal and ventral scale.

Tail moderate in proportions, 97 mm in length, last 45 mm regenerated, 9.7 mm in width at base, tapering to a point; dorsal scales of tail flat; median row of transversely expanded subcaudal scales twice as wide as long, not extending onto lateral subcaudal region; two enlarged postloacal tubercles at base of tail on left hemipenial swelling only; and postloacal scales flat.

*Coloration in life (Fig. 15):* Dorsal ground colour of head body, limbs and tail yellowish tan; top of head and rostrum bearing, diffuse, irregularly shaped, dark blotches outlined by a yellow reticulum; superciliary scales yellowish; dark nuchal loop outlined in yellow bearing an anterior, azygous

notch and straight, posterior margin; three wide body bands wider than interspaces, bearing lightened centres, lacking paravertebral elements, edged with yellowish tubercles; first dorsal band bearing an anterior, azygous notch; no band on nape; one postsacral band; anterior interspaces yellowish, posterior interspaces brown, all bearing large, dark markings; limbs mottled with yellowish markings and diffuse dark spots; dark caudal bands bearing lightened centres, wider than light caudal bands; light caudal bands bearing dark markings, not encircling tail; regenerated portion of tail bearing dark and light spots; all ventral surfaces beige, generally unpigmented; and subcaudal region darker.

*Variation (Fig. S2):* There is a subtle colour pattern polymorphism in the banding pattern in the type series. The paratypes LSUHC 12971, 12980 and 12986 closely approximate the holotype in aspects of colour pattern by having three wide, light-brown, variably shaped, dorsal bands and mottled interspaces, whereas paratypes LSUHC 12972–73, 12984 and BYU 52214 have four darker, more regularly shaped dorsal bands and immaculate interspaces. LSUHC 12970 and 12981 are juveniles with incomplete posterior bands. The azygous nuchal notch is so deep in LSUHC 12984 the nuchal loop is completely bifurcated. In the holotype LSUHC 12983, the notch is closed anteriorly. LSUHC 12971 has a unicolour tan, newly regenerated tail, whereas the mature regenerated tails of LSUHC

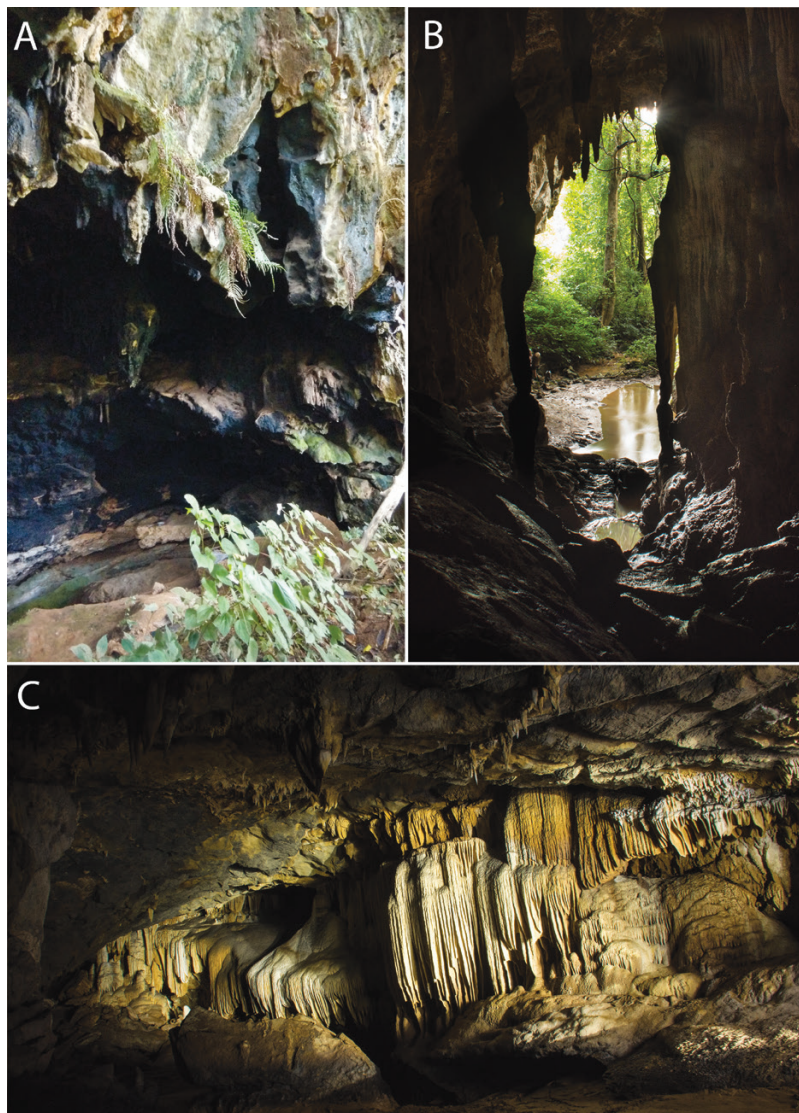

**Figure 16.** Cave mouths of Yae Htwat (A) and Lay Htwat Caves (B) and the interior of Yum Twing Gyu Cave (C), Shan State, Myanmar.

12972, 12980 and BYU 52214 have dark spots. The subcaudal scales of the regenerated scales in LSUHC 12970–72, 12980 and BYU 52214 are transversely elongate and irregularly arranged. Meristic and mensural differences are presented in [Table 9](#).

*Distribution:* *Cyrtodactylus linnwayensis* sp. nov. is known only from Lay Htwat, Yae Htwat and Yum Twing Gyi caves near Linn-Way Village, 12.7–13.3 km north-east of Ywangan, Taunggyi District, Shan State, Myanmar ([Figs 2, 9](#)).

*Etymology:* The specific epithet, *linnwayensis*, is a noun in apposition in reference to Linn-Way Village near the type locality.

*Natural history:* Lay Htwat, Yae Htwat and Yum Twing Gyi caves are situated along the same karst ridge that arcs around a low, flat depression that fills with water during the monsoon season. The northernmost cave, Yae Htwat, has a wide (~10 m), high (~40 m) opening formed by an underground river flowing out of the cave. The cave floor is approximately 10 m above the cave entrance and requires climbing to access it. Approximately 100 m back from the entrance, the cave opens up to 50–60 m in width. The centre of the cave has a small stream running through it and the cave floor is strewn with small, stream-worn stones. There are several cracks, holes and narrow side passages along the cave walls as well as several small to large stalactites and stalagmites and deep fissures (~15 m) bearing running water in the centre of the cave that provide the necessary microhabitat for geckos ([Fig. 16](#)). Between 1300 and 1500 h, one specimen was found approximately 100 m in from the cave entrance running across the cave floor near the wall in near total darkness and another was found 2 m up on the cave wall only 20 m in from the cave entrance where light was still plentiful. After dark, between 1900 and 2100 h, two additional specimens were found on the sides of boulders along the karst ridge outside the cave entrance.

Lay Htwat and Yum Twing Gyi caves are approximately 1 km south of Yae Htwat Cave and the openings of the former are no more than 30 m apart. Lay Htwat Cave has a 2 m by 2 m opening and the interior of the cave is congested with numerous, narrow passages, cracks, holes, cave formations of all sizes and shapes, and a deep underground stream. At 1800 h we collected one *C. linnwayensis* sp. nov. 2 m up on the cave wall along a side passage just inside the entrance. Yum Twing Gyi Cave has an approximately 60 m wide and 15 m high opening. This cave too has water but is much more open and the centre of the cave has several boulder formations that looked as though they

had fallen from the roof. Stalactites, stalagmites and side passages occur throughout the cave and specimens were collected and observed on all these structures. During the evening between 1900 and 2200 h, we collected and observed additional specimens on the sides of karst boulders along the hilly ridge outside the caves. One juvenile (LSUHC 12981) was found on the trunk of a tree growing across a karst boulder.

*Comparisons:* *Cyrtodactylus linnwayensis* sp. nov. is part of the *linnwayensis* group. Student's *t*-tests indicate that *C. linnwayensis* sp. nov. and its sister species *C. shwetaungorum* are statistically different in their mean values of paravertebral tubercles and longitudinal rows of tubercles, generally indicating that *C. shwetaungorum* is more tuberculate than *C. linnwayensis* sp. nov. ([Table 8](#)). It differs further from *C. shwetaungorum* sp. nov. by having four vs. three rows of enlarged post-preloacal scale rows, a much lighter ground colour, light caudal bands that do not encircle the tail and a mature regenerated tail that is spotted ([Table 8](#)). The PCA analysis which loads most heavily for the total number of fourth toe lamellae and the number of post-preloacal scales—accounting for 54% of the total variation along the first two components ([Table S1](#))—shows they occupy non-overlapping regions in morphospace ([Fig. 12](#)). The genetic distance between the species of this group is 10.2% ([Table 10](#)) and morphological and colour pattern differences from other species in the Indo-Chinese clade are listed in [Table 8](#).

#### ***CYRTODACTYLUS SHWETAUNGORUM* SP. NOV.**

SHWETAUNG BENT-TOED GECKO

([FIG. 17](#); [TABLE 11](#))

*Holotype:* Adult male LSUHC 12937 collected on 12 October 2016 at 1930 h by Thaw Zin, Evan S. H. Quah, L. Lee Grismer, Perry L. Wood, Jr., Myint Kyaw Thura, Matthew L. Murdoch and Htet Kyaw from 5.0 km north of Pyinyaung Village at the Apache Cement factory mining site, Mandalay Region (N20°52.191, E96°24.296; 624 m in elevation).

*Paratypes:* Adult males LSUHC 12935 and BYU 52226 and subadult female BYU 52227 bear the same collection data as the holotype. Adult females LSUHC 12897 and BYU 52225 and juvenile female LSUHC 12896 were collected on 11 October 2016 between 1800 and 2200 h by L. Lee Grismer, Perry L. Wood, Jr., Myint Kyaw Thura, Evan S. H. Quah, Thaw Zin, Matthew L. Murdoch and Htet Kyaw from 5.3 km north of Pyinyaung Village at the Apache Cement factory mining site, Mandalay Region (N20°52.273, E96°24.319; 731 m in elevation).

**Table 10.** Percent uncorrected pairwise sequence divergence for species of the Burmese species groups calculated from 1548 base pairs of the mitochondrial gene *ND2*

|                                       | 1     | 2            | 3            | 4            | 5            | 6            | 7            | 8            | 9            | 10           | 11           | 12           |
|---------------------------------------|-------|--------------|--------------|--------------|--------------|--------------|--------------|--------------|--------------|--------------|--------------|--------------|
| 1. <i>C. aequalis</i>                 | *     | *            | *            | *            | *            | *            | *            | *            | *            | *            | *            | *            |
| 2. <i>C. dammathetensis</i> sp. nov.  | 0.110 | <b>0.005</b> | *            | *            | *            | *            | *            | *            | *            | *            | *            | *            |
| 3. <i>C. sadansineensis</i> sp. nov.  | 0.210 | 0.244        | <b>0.003</b> | *            | *            | *            | *            | *            | *            | *            | *            | *            |
| 4. <i>C. linnoensis</i> sp. nov.      | 0.236 | 0.239        | 0.181        | <b>0.000</b> | *            | *            | *            | *            | *            | *            | *            | *            |
| 5. <i>C. linnwayensis</i> sp. nov.    | 0.236 | 0.252        | 0.241        | 0.228        | <b>0.000</b> | *            | *            | *            | *            | *            | *            | *            |
| 6. <i>C. pharbaungensis</i> sp. nov.  | 0.213 | 0.207        | 0.117        | 0.181        | 0.236        | <b>0.000</b> | *            | *            | *            | *            | *            | *            |
| 7. <i>C. sadanensis</i> sp. nov.      | 0.238 | 0.224        | 0.169        | 0.112        | 0.214        | 0.151        | <b>0.007</b> | *            | *            | *            | *            | *            |
| 8. <i>C. sanpelensis</i> sp. nov.     | 0.172 | 0.191        | 0.131        | 0.181        | 0.220        | 0.087        | 0.135        | <b>0.001</b> | *            | *            | *            | *            |
| 9. <i>C. shwetaungorum</i> sp. nov.   | 0.268 | 0.252        | 0.249        | 0.244        | 0.102        | 0.244        | 0.230        | 0.228        | <b>0.000</b> | *            | *            | *            |
| 10. <i>C. sinyineensis</i> sp. nov.   | 0.152 | 0.165        | 0.197        | 0.252        | 0.260        | 0.215        | 0.218        | 0.204        | 0.252        | <b>0.010</b> | *            | *            |
| 11. <i>C. welpyanensis</i> sp. nov.   | 0.134 | 0.148        | 0.184        | 0.228        | 0.236        | 0.203        | 0.194        | 0.176        | 0.250        | 0.118        | <b>0.004</b> | *            |
| 12. <i>C. yathepyanensis</i> sp. nov. | 0.277 | 0.278        | 0.197        | 0.110        | 0.225        | 0.213        | 0.127        | 0.184        | 0.233        | 0.246        | 0.242        | <b>0.009</b> |

Bolded percentages along the diagonal are intraspecific divergences.

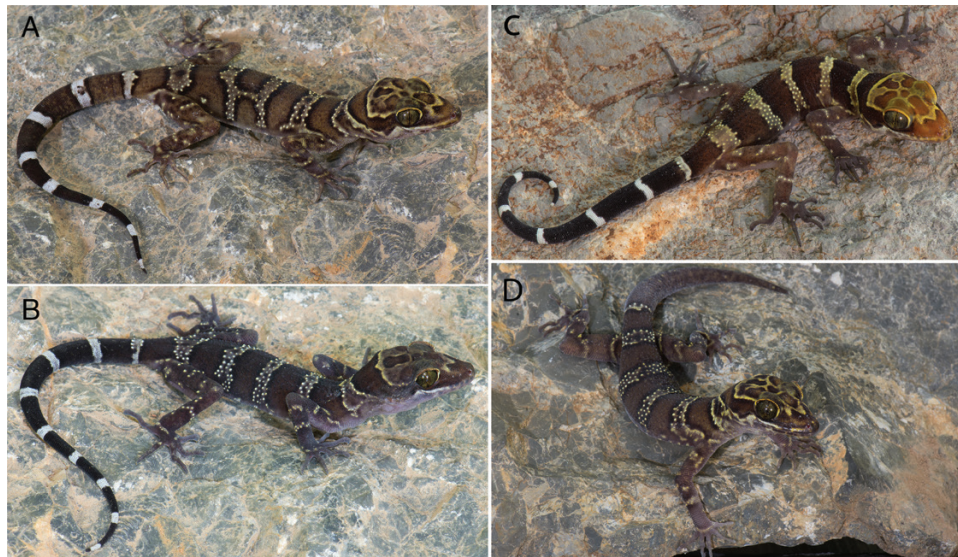

**Figure 17.** A, adult male holotype of *Cyrtodactylus shwetaungorum* sp. nov. (LSUHC 12937) from the type locality, 5.0 km north of Pyinyaung Village at the Apache Cement factory mining site, Mandalay Region. B, subadult male paratype (BYU 52227) from the type locality. C, hatchling (LSUHC 13043) from the type locality. D, adult female (LSUHC 13097) from Pyinyaung River, 5 km south of the type locality.

*Additional specimens observed:* Hatchlings (LSUHC 13043–45) collected on 19 March 2017 from the type locality and adult female (LSUHC 13097) collected on 23 March 2017 from Pyinyuang River, 5 km south of the type locality.

*Diagnosis:* *Cyrtodactylus shwetaungorum* sp. nov. differs from all congeners by having the unique combination of 7–9 supralabials; 6–8 infralabials; 31–35 paravertebral tubercles; 18–21 longitudinal rows of body tubercles; 33–40 ventral scales; relatively long digits with eight or nine expanded subdigital lamellae on the fourth toe proximal to the digital

inflection, 11–14 unmodified distal subdigital lamellae and 20–22 total subdigital lamellae; low, weakly keeled, dorsal body tubercles; tubercles not extending beyond base of tail; enlarged femoral and precloacal scales continuous; 24–32 enlarged femoral scales; enlarged femoral scales nearly equal in size; 15–17 femoral pores in males; 8–10 enlarged precloacal scales; 8–10 precloacal pores in males; three rows of enlarged post-precloacal scales; transverse subcaudal scales twice as wide as long midway down the tail not extending onto the lateral subcaudal region; top of head blotched, bearing a yellow reticulum; nuchal loop not divided medially, not bearing an anterior,

**Table 11.** Meristic, mensural and colour pattern data from the type series of *Cyrtodactylus shwetaungor um* sp. nov.

| Locality                                                      | LSUHC 12937 |            | BYU 52226 |            | BYU 52227 |            | LSUHC 12896 |            | LSUHC 12897 |            | LSUHC 12898 |            | BYU 52225 |            |
|---------------------------------------------------------------|-------------|------------|-----------|------------|-----------|------------|-------------|------------|-------------|------------|-------------|------------|-----------|------------|
|                                                               | holotype    | Lower site | paratype  | Lower site | paratype  | Lower site | paratype    | Upper site | paratype    | Upper site | paratype    | Upper site | paratype  | Upper site |
| Sex                                                           | m           | m          | m         | f          | f         | f          | f           | f          | f           | f          | f           | f          | f         | f          |
| Supralabials                                                  | 7           | 8          | 8         | 8          | 8         | 8          | 9           | 9          | 9           | 9          | 9           | 9          | 9         | 8          |
| Infralabials                                                  | 6           | 6          | 7         | 7          | 7         | 7          | 7           | 8          | 8           | 7          | 7           | 7          | 7         | 7          |
| Body tubercles low, weakly keeled                             | Yes         | Yes        | Yes       | Yes        | Yes       | Yes        | Yes         | Yes        | Yes         | Yes        | Yes         | Yes        | Yes       | Yes        |
| Body tubercles raised, moderately to strongly keeled          | No          | No         | No        | No         | No        | No         | No          | No         | No          | No         | No          | No         | No        | No         |
| Paravertebral tubercles                                       | 33          | 32         | 33        | 33         | 33        | 33         | 33          | 35         | 35          | 31         | 31          | 35         | 35        | 35         |
| Longitudinal rows of body tubercles                           | 21          | 19         | 19        | 18         | 18        | 18         | 19          | 18         | 18          | 19         | 19          | 18         | 18        | 18         |
| Tubercles extend beyond base of tail                          | No          | No         | No        | No         | No        | No         | No          | No         | No          | No         | No          | No         | No        | No         |
| Ventral scales                                                | 40          | 35         | 33        | 38         | 38        | 38         | 37          | 40         | 40          | 40         | 40          | 35         | 35        | 35         |
| Expanded subdigital lamellae on fourth toe                    | 8           | 9          | 8         | 8          | 8         | 8          | 8           | 8          | 8           | 8          | 8           | 9          | 9         | 9          |
| Unmodified subdigital lamellae on fourth toe                  | 12          | 11         | 13        | 12         | 12        | 12         | 12          | 12         | 12          | 14         | 14          | 13         | 13        | 13         |
| Total subdigital lamellae on fourth toe                       | 20          | 20         | 21        | 20         | 20        | 20         | 20          | 20         | 22          | 22         | 22          | 22         | 22        | 22         |
| Enlarged femoral scales (R/L)                                 | 15RL        | 13R/14     | 15R17L    | 15RL       | 15RL      | 15RL       | 13R13L      | 15R/14L    | 12RL        | 14R13L     | 12RL        | 14R13L     | 14R13L    | 14R13L     |
| Femoral pores (R/L)                                           | 8R7L        | 8R7L       | 8R9L      | /          | /         | /          | /           | 6R/9L      | /           | /          | /           | /          | /         | /          |
| Enlarged precolacal scales                                    | 8           | 10         | 11        | 10         | 10        | 10         | 10          | 10         | 9           | 9          | 9           | 10         | 10        | 10         |
| Precloacal pores                                              | 8           | 10         | 9         | 8          | 8         | 8          | 10          | 10         | 9           | 9          | 9           | 9          | 9         | 9          |
| Post-precloacal scales rows                                   | 3           | 3          | 3         | 3          | 3         | 3          | 3           | 3          | 3           | 3          | 3           | 3          | 3         | 3          |
| Enlarged femoral and pre-cloacal scales continuous            | Yes         | Yes        | Yes       | Yes        | Yes       | Yes        | Yes         | Yes        | Yes         | Yes        | Yes         | Yes        | Yes       | Yes        |
| Pore-bearing femoral and precloacal scales continuous         | No          | No         | No        | No         | No        | No         | No          | No         | No          | No         | No          | No         | No        | No         |
| Enlarged proximal femoral scales ~1/2 size of distal femorals | No          | No         | No        | No         | No        | No         | No          | No         | No          | No         | No          | No         | No        | No         |



**Table 11.** *Continued*

|                                                        | LSUHC 12937<br>holotype | LSUHC 12935<br>paratype | BYU 52226<br>paratype | BYU 52227<br>paratype | LSUHC 12896<br>paratype | LSUHC 12897<br>paratype | LSUHC 12898<br>paratype | BYU 52225<br>paratype |
|--------------------------------------------------------|-------------------------|-------------------------|-----------------------|-----------------------|-------------------------|-------------------------|-------------------------|-----------------------|
| Locality                                               | Lower site              | Lower site              | Lower site            | Lower site            | Upper site              | Upper site              | Upper site              | Upper site            |
| Medial subcaudals two or three times wider than long   | 2                       | /                       | 2                     | 2                     | 2                       | 2                       | 2                       | 2                     |
| Medial subcaudals extend onto lateral surface of tail  | No                      | /                       | No                    | No                    | No                      | No                      | No                      | No                    |
| Nuchal loop divided medially                           | No                      | No                      | No                    | No                    | No                      | No                      | No                      | No                    |
| Nuchal loop with anterior azygous notch                | No                      | No                      | No                    | No                    | No                      | No                      | No                      | No                    |
| Posterior border of nuchal loop                        | Straight                | Straight                | Straight              | Straight              | Straight                | Straight                | Straight                | Straight              |
| Band on nape                                           | No                      | No                      | No                    | No                    | No                      | No                      | No                      | No                    |
| Dorsal banding with paravertebral elements             | No                      | No                      | No                    | No                    | No                      | No                      | No                      | No                    |
| Number of body bands                                   | 4                       | 4                       | 4                     | 4                     | 4                       | 4                       | 4                       | 4                     |
| Dorsal bands wider than interspaces                    | Yes                     | Yes                     | Yes                   | Yes                   | Yes                     | Yes                     | Yes                     | Yes                   |
| Dorsal bands bearing lightened centres                 | Yes                     | Yes                     | Yes                   | Yes                   | Yes                     | Yes                     | Yes                     | Yes                   |
| Dorsal bands edged with light-coloured tubercles       | Yes                     | Yes                     | Yes                   | Yes                   | Yes                     | Yes                     | Yes                     | Yes                   |
| Dorsal band borders                                    | Smooth                  | Smooth                  | Smooth                | Smooth                | Smooth                  | Smooth                  | Smooth                  | Smooth                |
| Dark markings in dorsal interspaces                    | Yes                     | Yes                     | Yes                   | Yes                   | Yes                     | Yes                     | Yes                     | Yes                   |
| Ventrolateral body fold whitish                        | No                      | No                      | No                    | No                    | No                      | No                      | No                      | No                    |
| Top of head diffusely mottled, blotched or patternless | Blotched                | Blotched                | Blotched              | Blotched              | Blotched                | Blotched                | Blotched                | Blotched              |
| Light reticulum on top of head                         | Yes                     | Yes                     | Yes                   | Yes                   | Yes                     | Yes                     | Yes                     | Yes                   |
| Anterodorsal margin of thighs darkly pigmented         | Yes                     | Yes                     | Yes                   | Yes                   | Yes                     | Yes                     | Yes                     | Yes                   |
| Anterodorsal margin of brachia darkly pigmented        | Yes                     | Yes                     | Yes                   | Yes                   | Yes                     | Yes                     | Yes                     | Yes                   |
| Light caudal bands with dark markings                  | No                      | /                       | /                     | No                    | No                      | /                       | /                       | /                     |

Table 11. Continued

|                                                 | LSUHC 12937 | LSUHC 12935 | BYU 52226  | BYU 52227  | LSUHC 12896 | LSUHC 12897 | LSUHC 12898 | BYU 52225  |
|-------------------------------------------------|-------------|-------------|------------|------------|-------------|-------------|-------------|------------|
|                                                 | holotype    | paratype    | paratype   | paratype   | paratype    | paratype    | paratype    | paratype   |
| Locality                                        | Lower site  | Lower site  | Lower site | Lower site | Upper site  | Upper site  | Upper site  | Upper site |
| Light caudal bands encircle tail                | Yes         | /           | /          | Yes        | Yes         | /           | /           | /          |
| Number of light caudal bands                    | 8           | /           | /          | 9          | 8           | /           | /           | /          |
| Number of dark caudal bands                     | 9           | /           | /          | 9          | 7           | /           | /           | /          |
| Dark caudal bands wider than light caudal bands | Yes         | /           | /          | Yes        | Yes         | /           | /           | /          |
| Mature regenerated tail spotted                 | No          | No          | No         | No         | No          | No          | No          | No         |
| SVL                                             | 94.9        | 93.0        | 90.3       | 74.1       | 62.5        | 101.7       | 100.4       | 102.2      |
| TL                                              | 114.0       | 12b         | 90r        | 92.0       | 85.0        | 66r         | 76r         | 88r        |
| TW                                              | 10.5        | 10.4        | 9.6        | 7.4        | 5.9         | 9.8         | 10.6        | 9.0        |
| FL                                              | 16.0        | 15.0        | 15.1       | 13.1       | 11.4        | 16.3        | 15.6        | 16.9       |
| TBL                                             | 19.1        | 18.0        | 18.5       | 15.3       | 12.6        | 19.4        | 20.1        | 18.7       |
| AG                                              | 39.7        | 39.0        | 35.8       | 30.4       | 28.4        | 43.0        | 42.4        | 45.3       |
| HL                                              | 27.5        | 25.2        | 27.0       | 22.8       | 19.4        | 29.3        | 27.1        | 27.8       |
| HW                                              | 19.7        | 19.4        | 18.8       | 15.5       | 13.5        | 20.0        | 19.6        | 19.8       |
| HD                                              | 11.2        | 11.0        | 10.6       | 8.5        | 8.3         | 11.9        | 11.7        | 12.1       |
| ED                                              | 5.8         | 5.7         | 5.4        | 4.9        | 4.5         | 6.3         | 6.2         | 6.8        |
| EE                                              | 8.8         | 7.5         | 8.1        | 6.5        | 5.1         | 7.8         | 8.0         | 7.5        |
| ES                                              | 11.4        | 11.1        | 11.3       | 9.8        | 8.2         | 11.7        | 11.3        | 11.9       |
| EN                                              | 8.6         | 8.5         | 8.9        | 8.0        | 5.8         | 9.1         | 9.0         | 9.7        |
| IO                                              | 8.5         | 7.0         | 7.5        | 6.2        | 5.8         | 7.3         | 7.9         | 7.9        |
| EL                                              | 3.0         | 1.9         | 2.2        | 2.0        | 2.0         | 3.1         | 2.3         | 2.3        |
| IN                                              | 3.1         | 3.0         | 3.3        | 2.7        | 2.4         | 2.9         | 3.3         | 3.5        |

Abbreviations are listed in the Material and Methods. R, right; L, left; /, data unobtainable or not applicable; r, regenerated; b, broken.

azygous notch, and having a straight posterior border; no band on nape; four dark, regularly shaped, dorsal bands with no paravertebral elements, much wider than interspaces, centres lightened, edged with light tubercles; no azygous notch in first dorsal band; dark markings in dorsal interspaces; anterodorsal margins of thighs, brachia and ventrolateral fold not whitish; eight or nine light caudal bands encircling tail, lacking dark markings; 7–9 dark caudal bands wider than light caudal bands; and fully regenerated tail not spotted.

*Description of holotype:* Adult male SVL 94.9 mm; head moderate in length (HL/SVL 0.29), wide (HW/HL 0.72), flat (HD/HL 0.41), distinct from neck, triangular in dorsal profile; lores inflated, prefrontal region concave, canthus rostralis rounded; snout elongate (ES/HL 0.42), rounded in dorsal profile, broad in lateral profile; eye large (ED/HL 0.21); ear opening oval (EL/HL 0.11); eye to ear distance greater than diameter of eye; rostral rectangular, partially divided dorsally, bordered posteriorly by left and right supranasals and one azygous scale, laterally by first supralabials; external nares bordered anteriorly by rostral, dorsally by supranasal, posteriorly by two postnasals and ventrally by first supralabial; 7(R)8(L) rectangular supralabials extending to below midpoint of eye; 6(R,L) infralabials tapering posteriorly to below orbit; scales of rostrum and lores slightly raised, much larger than granular scales on top of head and occiput; scales on top of head and occiput intermixed with small tubercles; dorsal superciliaries weakly pointed and directed posteriorly; mental triangular, bordered laterally by first infralabials and posteriorly by large, left and right, trapezoidal postmentals contacting medially for 50% of their length posterior to mental; two rows of variably enlarged chinshields bordering all infralabials; and gular and throat scales granular, grading posteriorly into larger, subimbricate pectoral and ventral scales.

Body relatively short (AG/SVL 0.42) with well-defined, ventrolateral folds; dorsal scales small, raised and interspersed with large, low, semi-regularly arranged, weakly keeled tubercles; tubercles extend from nape to base of tail but no farther; tubercles on nape smaller but sharper than those on posterior portion of body and less strongly keeled; 33 paravertebral body tubercles; approximately 21 longitudinal rows of body tubercles; 40 flat, subimbricate, ventral scales larger than dorsal scales; enlarged femoral and precloacal scales continuous; 15 femoral pores; eight enlarged precloacal scales; eight precloacal pores; three rows of large, post-precloacal scales; and no deep precloacal groove or depression.

Forelimbs moderate in stature, relatively short (FL/SVL 0.17); raised, juxtaposed scales of forearm larger

than those on body, intermixed with tubercles; palmar scales flat; digits well-developed, relatively long, inflected at basal, interphalangeal joints; digits much more narrow distal to inflections; widened, proximal subdigital lamellae do not extend onto palm; claws well-developed, sheathed by a dorsal and ventral scale at base; hindlimbs more robust than forelimbs, moderate in length (TBL/SVL 0.20), covered dorsally by small, raised, juxtaposed scales intermixed with large tubercles and bearing flat, slightly larger scales anteriorly; ventral scales of thigh flat, imbricate, larger than dorsals, one row of 15(R,L) enlarged femoral scales in contact with enlarged precloacal scales; 8(R)7(L) femoral pores; small, postfemoral scales form an abrupt union with larger, flat, ventral scales of posteroventral margin of thigh; subtibial scales flat, imbricate; plantar scales flat; digits relatively long, well-developed, inflected at basal, interphalangeal joints; 8(R,L) transversely expanded subdigital lamellae on fourth toe proximal to joint inflection that do not extend onto sole, 12(R,L) unmodified lamellae distal to inflection; and claws well-developed, sheathed by a dorsal and ventral scale at base.

Tail original, moderate in proportions, 114.0 mm in length, 10.5 mm in width at base, tapering to a point; dorsal scales of tail flat; median row of transversely expanded subcaudal scales twice as wide as long, not extending to lateral caudal region; two enlarged, post-cloacal tubercles at base of tail on hemipenial swellings; and postcloacal scales flat.

*Coloration in life (Fig. 17):* Dorsal ground colour of head, limbs and tail brown; top of head and rostrum bearing, irregularly shaped, dark blotches outlined by a yellow reticulum; dark, occipital, hourglass marking; superciliary scales yellowish; dark nuchal loop outlined in yellow bearing a straight posterior margin and no azygous notch; four wide, regularly shaped, dark, body bands much wider than interspaces, bearing lightened centres, lacking paravertebral elements, edged with yellowish tubercles; first dorsal band lacking azygous notch; third body band divided on right side; no band on nape; one postsacral band; interspaces thin, bearing large, dark, diffuse markings; limbs mottled with yellowish markings and diffuse, dark spots and bands; dark caudal bands, wider than light caudal bands; anterior two bands bearing slightly lightened centres; anterior light caudal bands bearing dark markings, encircling tail; all ventral surfaces dusky, weakly pigmented; and subcaudal region darker.

*Variation (Fig. S3):* The paratypes generally approximate the holotype in aspects of colour pattern, the difference being that they have no body bands that are completely divided laterally and they are all

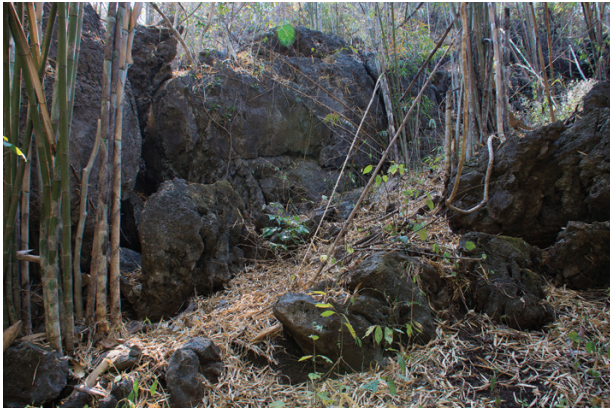

**Figure 18.** Habitat of *Cyrtodactylus shwetaungorum* sp. nov. at the type locality, 5.0 km north of Pyinyaung Village in the Sai Taung Range at the Apache Cement factory mining site, Mandalay Region.

darker and more uniform in colour. In BYU 52225, the third body band bifurcates on the left flank. LSUHC 12935 lacks a tail and LSUHC 12897–99 and BYU 52226 have regenerated tails. Hatchlings LSUHC 13043–45 have solid dark-brown dorsal ground colour and five regularly shaped, yellow dorsal bands. The top of the head is dull-orange and overlain with a yellow reticulum. The tail is black with seven or eight thin white bands (Fig. 17). LSUHC 12896 and BYU 52227 are a juvenile and subadult, respectively, and show no difference in colour pattern, suggesting that the ontogenetic changes occur coloration and pattern happen early on in life. Meristic and mensural differences are presented in Table 11.

**Distribution:** *Cyrtodactylus shwetaungorum* sp. nov. is known from the type locality 5.0 km north of Pyinyaung Village at the Apache Cement factory mining site, Mandalay Region, Myanmar and along the Pyinyaung River 5 km south of the type locality (Figs 2, 9). It likely occurs further to the north and south of these localities along the karstic Sai Taung Range.

**Etymology:** The specific epithet, *shwetaungorum* (pronounced *shway-tong-orum*), is a patronym honouring the Shwe Taung Cement Company Limited for their genuine, proactive efforts to protect the biodiversity encompassed in their mining operations in Myanmar by setting aside areas to be reserved and not quarried. The company is particularly interested in setting aside specific areas to protect *C. pyinyaungensis* sp. nov. and *C. shwetaungorum* sp. nov.

**Natural history:** The upper and lower (735 and 642 m in elevation, respectively) collection sites are contiguous along the same valley. These sites

occur in disturbed, secondary, bamboo forest with varying sizes of limestone outcroppings along a drainage with several smaller ravines leading into the main drainage area. Each ravine is lined with limestone outcroppings and limestone boulders are scattered throughout the ravine bottom. The boulders themselves are perforated with several cracks and holes that provide ideal microhabitat structure for gekkonids (Fig. 18). These structures provided retreat sites during the day in which geckos remain inactive but are used as escape sites into which they would flee at night upon our approach. Eight specimens of *C. shwetaungorum* sp. nov. were seen over the course of two nights during October of 2016 of which seven were captured. All were on the base of large limestone rocks, fallen logs or on the ground and would flee towards rocks when illuminated with light. Three hatchlings were observed during additional observations on 19 and 23 March but no gravid females were observed. Other gekkonids observed in the area were *C. pyinyaungensis* sp. nov., *Gekko gekko* and *Hemidactylus* sp. nov.

**Comparisons:** See *Cyrtodactylus linnwayensis* sp. nov.

**Remarks:** The close morphological similarity between *C. linnwayensis* sp. nov. and *C. shwetaungorum* sp. nov. leaves open the hypothesis that these two species may be conspecific and their sister species relationship may be a result of sampling error despite their minimum sequence divergence of 10.2%. Although they are separated from one another by approximately 40 km straight-line distance across an intermontane valley and occur at different elevations in different climates and different types of forests—a cool, wet, upland forest at 1130 m in elevation for *C. linnwayensis* sp. nov. and a hot, dry, lowland forest at 642–735 m for *C. shwetaungorum* sp. nov.—they occupy a fairly continuous, mountainous terrain bearing sporadic karst habitats and caves that arc around the northern end of an intermontane valley. Plans have been made to collect from additional karst areas between their localities (if they exist) and to test the ‘different species and sampling error’ hypotheses. At this juncture, we believe the ecological, morphological and genetic data favour a separate species hypothesis.

#### *The sadansinensis group*

The monophyletic *sadansinensis* group occurs within the lowland flood plain of the Salween River Basin in Mon State and is composed of *Cyrtodactylus sadansinensis* sp. nov. and the sister species *C. pharbaungensis* sp. nov. and *C. sanpelensis* sp. nov. (Fig. 9). The *sadansinensis* group is defined by the flowing range

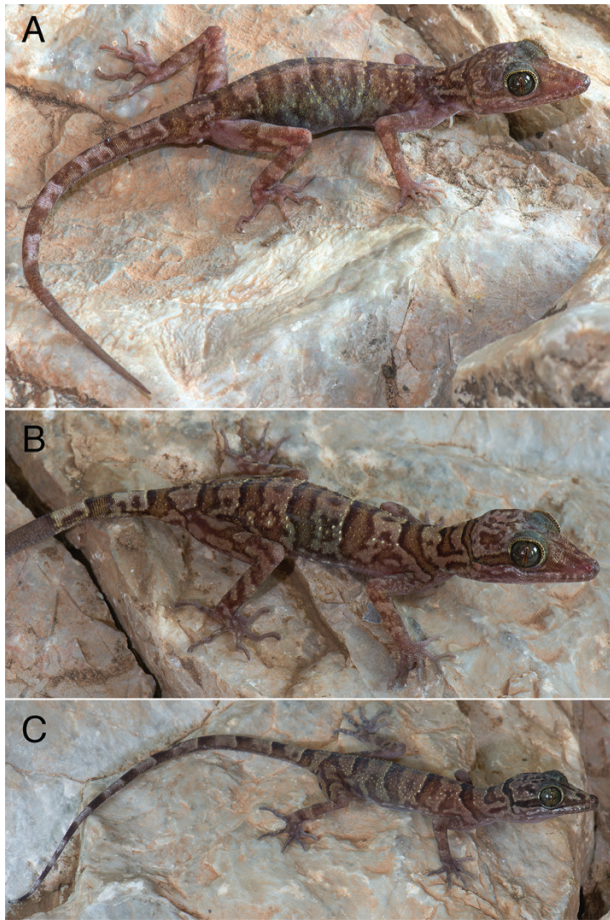

**Figure 19.** A, adult male holotype of *Cyrtodactylus sadansinensis* sp. nov. (LSUHC 12857) from the type locality of Sadan Sin Cave, 10.5 km north-west of Mawlamyine, Mawlamyine District, Mon State, Myanmar. B, adult female paratype (LSUHC 12859) from the type locality. C, juvenile male paratype (LSUHC 12856) from the type locality.

of characters: 8–11 supralabial scales; seven or eight infralabial scales; dorsal body tubercles low, weakly keeled, not extending beyond base of tail; 25–31 paravertebral tubercles; 9–14 longitudinal rows of body tubercles; 31–41 ventral scales; 20–24 subdigital lamellae on the fourth toe; 14–34 enlarged femoral scales; femoral scales usually equal in size; 8–21 femoral pores in males; 9–15 enlarged preloacal scales; 5–14 preloacal pores in males; two or three post-preloacal scale rows; medial subcaudal scales three times wider than long, extending onto lateral subcaudal region; top of head bearing dark, mottled pattern with no yellow reticulum; no anterior, azygous notch in nuchal loop; dark band on nape; 4–6 regularly shaped body bands with lightened centres, not edged with light tubercles; anterodorsal margins of thighs and brachia pigmented; ventrolateral fold not whitish; 6–11 light caudal bands

not encircling tail; 7–10 dark caudal bands; and maximum SVL 69.6–73.9 mm (Table 8). The description and diagnosis of each new species of this group follows.

***CYRTODACTYLUS SADANSINENSIS* SP. NOV.**

SADAN SIN CAVE BENT-TOED GECKO

(FIG. 19; TABLE 12)

*Holotype:* Adult male LSUHC 12857 collected on 6 October 2016 at 1600 h by Evan S. H. Quah, Perry L. Wood, Jr., Matthew L. Murdoch, Thaw Zin, Myint Kyaw Thura, Htet Kyaw and L. Lee Grismer from Sadan Sin Cave 10.5 km north-west of Mawlamyine, Mawlamyine District, Mon State, Myanmar (N16°31.729, E97°43.056; 26 m in elevation).

*Paratypes:* Adult females BYU 52220, 12858–59 and juvenile male LSUHC 12856 bear the same collection data as the holotype.

*Diagnosis:* *Cyrtodactylus sadansinensis* sp. nov. differs from all congeners by having the unique combination of 8–10 supralabials; seven or eight infralabials; 25–28 paravertebral tubercles; 9–11 longitudinal rows of body tubercles; 31–34 ventral scales; relatively long digits with eight or nine expanded subdigital lamellae on the fourth toe proximal to the digital inflection, 14–16 unmodified distal subdigital lamellae, 22–24 total subdigital lamellae; low and rounded, weakly keeled, dorsal, body tubercles not extending onto tail; enlarged femoral and preloacal scales not continuous; 19–23 enlarged femoral scales; 20 or 21 femoral pores in males; 12–15 enlarged preloacal scales; 12–14 preloacal pores in males; three rows of enlarged post-preloacal scales; subcaudal scales three times as wide as long, extending onto sides of tail; top of head bearing a dark mottled pattern, no yellow reticulum; nuchal loop not divided medially, lacking an azygous notch, and usually having a sinuous posterior border; five dark, regularly shaped, dorsal bands never wider than interspaces, bearing lightened centres, not edged with white tubercles; first dorsal band lacking azygous notch; dark markings in dorsal interspaces; ventrolateral fold not whitish; anterodorsal margin of thighs and brachia pigmented; 9–11 light caudal bands bearing dark markings, not encircling tail; 8–10 dark caudal bands never wider than light caudal bands; and regenerated tails immaculate, uniform brown.

*Description of holotype:* Adult male SVL 69.6 mm; head moderate in length (HL/SVL 0.30), wide (HW/HL 0.66), flat (HD/HL 0.37), distinct from neck,

**Table 12.** Meristic, mensural and colour pattern data from the type series of *Cyrtodactylus sadansinensis* sp. nov.

|                                                               | LSUHC 12857<br>holotype | BYU 12854<br>52220 | LSUHC 12856<br>paratype | LSUHC 12858<br>paratype | LSUHC 12859<br>paratype |
|---------------------------------------------------------------|-------------------------|--------------------|-------------------------|-------------------------|-------------------------|
| Sex                                                           | M                       | F                  | M                       | F                       | F                       |
| Supralabials                                                  | 9                       | 8                  | 10                      | 9                       | 9                       |
| Infralabials                                                  | 7                       | 7                  | 8                       | 8                       | 7                       |
| Body tubercles low, weakly keeled                             | Yes                     | Yes                | Yes                     | Yes                     | Yes                     |
| Body tubercles raised, moderately to strongly keeled          | No                      | No                 | No                      | No                      | No                      |
| Paravertebral tubercles                                       | 28                      | 28                 | 25                      | 27                      | 26                      |
| Longitudinal rows of body tubercles                           | 10                      | 11                 | 9                       | 10                      | 10                      |
| Tubercles extend beyond base of tail                          | No                      | No                 | No                      | No                      | No                      |
| Ventral scales                                                | 33                      | 34                 | 34                      | 31                      | 34                      |
| Expanded subdigital lamellae on fourth toe                    | 8                       | 8                  | 8                       | 9                       | 9                       |
| Unmodified subdigital lamellae on fourth toe                  | 14                      | 16                 | 14                      | 14                      | 14                      |
| Total subdigital lamellae on fourth toe                       | 22                      | 24                 | 22                      | 23                      | 23                      |
| Enlarged femoral scales (R/L)                                 | 11R10L                  | 11R12L             | 11R12L                  | 11R10L                  | 9R10L                   |
| Femoral pores (R/L)                                           | 11R10L                  | /                  | 10RL                    | /                       | /                       |
| Enlarged precolacal scales                                    | 15                      | 14                 | 12                      | 13                      | 14                      |
| Precloacal pores                                              | 14                      | /                  | 12                      | /                       | /                       |
| Post-precloacal scales rows                                   | 3                       | 3                  | 3                       | 3                       | 3                       |
| Enlarged femoral and precloacal scales continuous             | No                      | No                 | No                      | No                      | No                      |
| Pore-bearing femoral and precloacal scales continuous         | No                      | No                 | No                      | No                      | No                      |
| Enlarged proximal femoral scales ~1/2 size of distal femorals | No                      | No                 | No                      | No                      | No                      |
| Medial subcaudals two or three times wider than long          | 3                       | 3                  | 3                       | 3                       | 3                       |
| Medial subcaudals extend onto lateral surface of tail         | Yes                     | Yes                | Yes                     | Yes                     | Yes                     |
| Nuchal loop divided medially                                  | No                      | No                 | No                      | No                      | No                      |
| Nuchal loop with anterior azygous notch                       | No                      | No                 | No                      | No                      | No                      |
| Posterior border of nuchal loop                               | Sinuuous                | Sinuuous           | Sinuuous                | Sinuuous                | Sinuuous                |
| Band on nape                                                  | Yes                     | Yes                | Yes                     | Yes                     | Yes                     |
| Dorsal banding with paravertebral elements                    | No                      | No                 | No                      | No                      | No                      |
| Number of body bands                                          | 5                       | 5                  | 5                       | 5                       | 5                       |
| Dorsal bands wider than interspaces                           | No                      | No                 | No                      | Same                    | No                      |
| Dorsal bands with lightened centres                           | Yes                     | Yes                | Yes                     | Yes                     | Yes                     |
| Dorsal bands edged with white tubercles                       | No                      | No                 | No                      | No                      | No                      |
| Dorsal band borders                                           | Smooth                  | Smooth             | Smooth                  | Smooth                  | Smooth                  |
| Dark markings in dorsal interspaces                           | Yes                     | Yes                | Yes                     | Yes                     | Yes                     |
| Ventrolateral fold whitish                                    | No                      | No                 | No                      | No                      | No                      |
| Top of head diffusely mottled, blotched or patternless        | Mottled                 | Mottled            | Mottled                 | Mottled                 | Mottled                 |
| Light reticulum on top of head                                | No                      | No                 | No                      | No                      | No                      |

**Table 12.** *Continued*

|                                                 | LSUHC 12857<br>holotype | BYU 12854<br>52220 | LSUHC 12856<br>paratype | LSUHC 12858<br>paratype | LSUHC 12859<br>paratype |
|-------------------------------------------------|-------------------------|--------------------|-------------------------|-------------------------|-------------------------|
| Anterodorsal margin of thighs darkly pigmented  | Yes                     | Yes                | Yes                     | Yes                     | Yes                     |
| Anterodorsal margin of brachia darkly pigmented | Yes                     | Yes                | Yes                     | Yes                     | Yes                     |
| White caudal bands with dark markings           | Yes                     | Yes                | Yes                     | Yes                     | Yes                     |
| White caudal bands encircle tail                | No                      | No                 | No                      | No                      | No                      |
| Number of light caudal bands                    | /                       | /                  | 11                      | 9                       | /                       |
| Number of dark caudal bands                     | /                       | /                  | 10                      | 8                       | /                       |
| Dark caudal bands wider than light caudal bands | Same                    | Same               | No                      | Same                    | No                      |
| Mature regenerated tail spotted                 | No                      | No                 | No                      | No                      | No                      |
| SVL                                             | 69.6                    | 68.1               | 48.7                    | 67.6                    | 66.7                    |
| TL                                              | 87.0r                   | 82.0r              | 72.0                    | 101.0                   | 93.0r                   |
| TW                                              | 7.9                     | 7.0                | 4.1                     | 7.2                     | 5.9                     |
| FL                                              | 11.8                    | 11.1               | 8.5                     | 12.2                    | 11.4                    |
| TBL                                             | 13.4                    | 12.7               | 10.5                    | 14.3                    | 112.9                   |
| AG                                              | 30.7                    | 29.0               | 20.5                    | 27.1                    | 29.2                    |
| HL                                              | 20.8                    | 20.7               | 15.7                    | 21.0                    | 20.3                    |
| HW                                              | 13.6                    | 13.3               | 9.8                     | 12.7                    | 13.0                    |
| HD                                              | 7.7                     | 7.6                | 5.5                     | 7.2                     | 6.8                     |
| ED                                              | 5.3                     | 4.9                | 4.1                     | 5.7                     | 4.7                     |
| EE                                              | 5.4                     | 5.0                | 3.4                     | 5.5                     | 5.1                     |
| ES                                              | 8.8                     | 8.9                | 7.0                     | 8.9                     | 8.9                     |
| EN                                              | 6.6                     | 6.6                | 4.7                     | 7.0                     | 6.9                     |
| IO                                              | 4.8                     | 4.5                | 4.0                     | 5.9                     | 5.8                     |
| EL                                              | 2.2                     | 1.7                | 1.8                     | 2.2                     | 2.6                     |
| IN                                              | 2.2                     | 2.0                | 1.6                     | 2.2                     | 2.3                     |

Abbreviations are listed in the Material and Methods. R, right; L, left; /, data unobtainable or not applicable; r, regenerated.

triangular in dorsal profile; lores inflated, prefrontal region weakly concave, canthus rostralis flattened; snout elongate (ES/HL 0.42), rounded in dorsal profile, flat in lateral profile; eye large (ED/HL 0.25); ear opening elliptical, vertically oriented, moderate in size (EL/HL 0.10); eye to ear distance greater than diameter of eye; rostral rectangular, partially divided dorsally by an inverted Y-shaped furrow, bordered posteriorly by large left and right supranasals and one small azygous internasal, laterally by first supralabials; external nares bordered anteriorly by rostral, dorsally by large supranasal, posteriorly by two postnasals, ventrally by first supralabial; 9(R,L) square supralabials extending to below midpoint of eye; 7(R,L) infralabials tapering posteriorly to below orbit; scales of rostrum and lores slightly raised, larger than granular scales on top of head and occiput; scales on top of head and occiput intermixed with slightly enlarged tubercles; dorsal superciliaries not elongate or keeled; mental triangular, bordered laterally by first infralabials and posteriorly by large left and right trapezoidal postmentals contacting medially for 45% of their length posterior to mental; one row of slightly enlarged chinshields bordering all infralabials; gular and throat scales small, flat, grading posteriorly into larger, subimbricate pectoral and ventral scales.

Body relatively short (AG/SVL 0.44) with well-defined ventrolateral folds; dorsal scales small, raised, interspersed with small, low, subconical, semi-regularly arranged, weakly keeled tubercles; tubercles extend from occiput onto base of tail but no farther; tubercles on occiput and nape very small, those on posterior portion of body larger and keeled; approximately ten longitudinal rows of body tubercles; 28 paravertebral tubercles; 33 flat, subimbricate, ventral scales larger than dorsal scales; enlarged femoral and precloacal scales discontinuous; 21 enlarged femoral scales; 21 femoral pores; 15 large precloacal scales; 14 precloacal pores; three rows of large, post-precloacal scales; and no deep, precloacal groove or depression.

Forelimbs moderate in stature, relatively short (FL/SVL 0.17); flat scales of forearm larger than those on body, not interspersed with tubercles; palmar scales flat; digits well-developed, relatively long, inflected at basal, interphalangeal joints; digits much more narrow distal to inflections; claws well-developed, sheathed by a dorsal and ventral scale at base; hindlimbs more robust than forelimbs, moderate in length (TBL/SVL 0.19), covered dorsally by granular scales and anteriorly by flat, slightly larger scales, and generally atuberculate; ventral scales of thigh flat, imbricate, larger than dorsal scales, one row of 11(R)10(L) enlarged femoral scales on distal one-half not in contact with enlarged precloacal

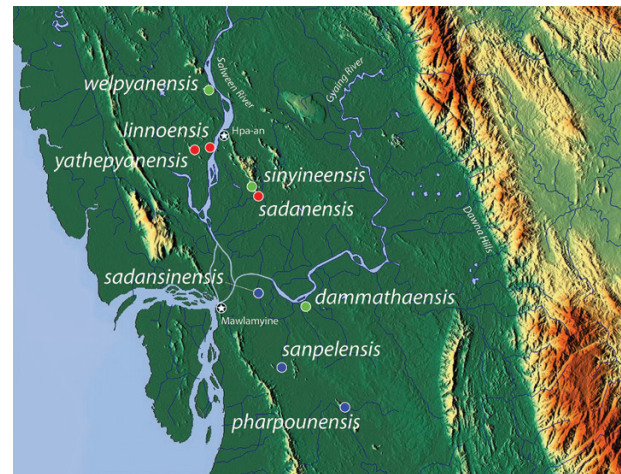

**Figure 20.** Distribution of the karst-adapted species of *Cyrtodactylus* in the Salween River Basin of Kayin and Mon states, Myanmar. Blue, red and green circles represent species of the *sadansinensis*, *yathepyanensis* and *sinyineensis* species groups, respectively.

scales; 11(R)10(L) femoral pores; subtibial scales flat, imbricate; small postfemoral scales form an abrupt union with larger, flat ventral scales of posteroventral margin of thigh; plantar scales low, flat; digits relatively long, well-developed, inflected at basal, interphalangeal joints; 8(R,L) transversely expanded subdigital lamellae on fourth toe proximal to joint inflection, 14(R,L) unmodified subdigital lamellae distal to inflection; 22 total subdigital lamellae; claws well-developed, base of claw sheathed by a dorsal and ventral scale.

Proximal two-thirds of tail original, moderate in proportions, 87.0 mm in length, 7.9 mm in width at base, tapering to a point; dorsal scales of base of tail granular rapidly becoming flatter and larger posteriorly; median row of wide, transversely expanded subcaudal scales three times as wide as long extending onto lateral surface of tail; two enlarged postcloacal tubercles at base of tail on hemipenial swelling; and postcloacal scales flat.

**Coloration in life (Fig. 19):** Dorsal ground colour of head body, limbs and tail tan to faintly magenta; top of head and rostrum covered with faint, irregular mottlings, no yellow reticulum; superciliary scales yellowish; nuchal band faint, unnotched anteromedially and bearing a sinuous posterior margin; cruciform pattern on nape; five regularly shaped body bands with lightened centres, not wider than interspaces, and one sacral band; limbs irregularly banded; dorsal interspaces bearing dark markings; proximal, dorsal portion of thighs lacking pigment; brachia and ventrolateral



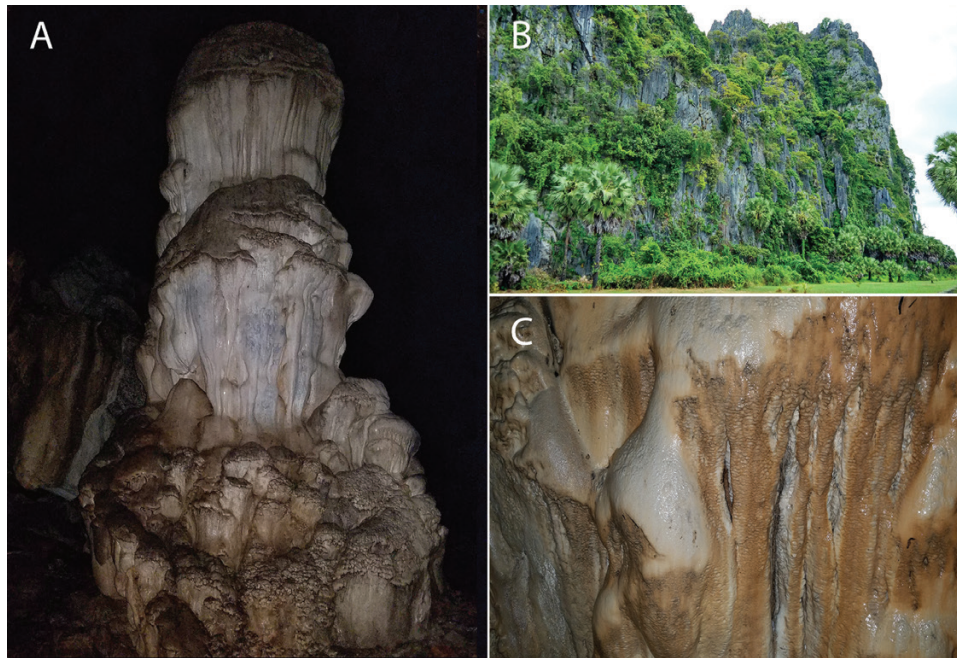

**Figure 21.** A and C, microhabitat structure inside Sadan Sin Cave, Mon State, Myanmar. B, limestone structure of the hillside outside of Sadan Cave.

folds dark; dark caudal bands bearing lightened centres; light caudal bands bear dark markings, do not encircle tail; ventral surfaces of head body and limbs beige with stippled lateral edges; and subcaudal region brown.

**Variation (Fig. S4):** The paratypes differ most notably from the holotype in having bolder, better-defined, dorsal markings. BYU 52220 is generally darker overall and the juvenile LSUHC 12856 (SVL = 48.7 mm) generally lacks dark pigment in the dorsal body interspaces. Meristic and mensural differences are presented in [Table 12](#).

**Distribution:** *Cyrtodactylus sadansinensis* sp. nov. is known only from Sadan Sin Cave 10.5 km north-west of Mawlamyine, Mawlamyine District, Mon State, Myanmar ([Fig. 20](#)).

**Etymology:** The specific epithet, *sadansinensis*, is a noun in apposition in reference to the type locality of Sadan Sin Cave.

**Natural history:** Sadan Sin Cave is situated on the eastern side of a small, isolated karst hill approximately 520 m wide, 1650 m long and 74 m high that is surrounded by paddy fields. The opening of the cave is approximately 60 m above the base of the hill. The interior of the cave

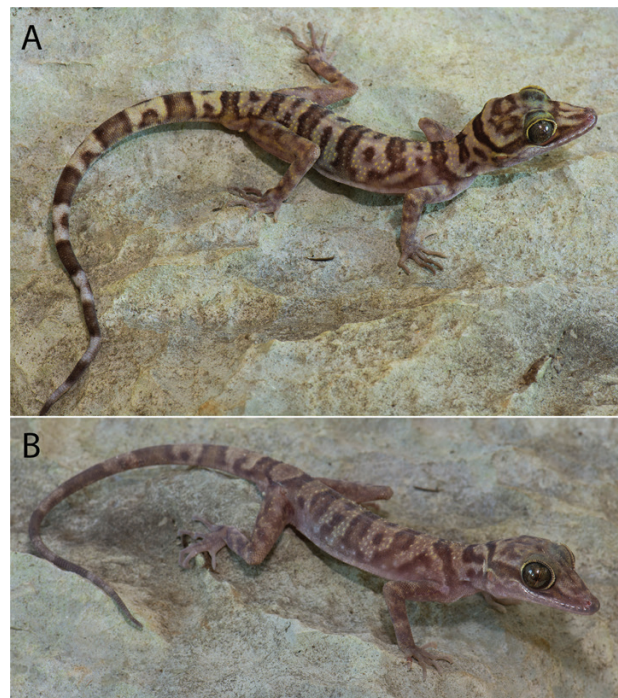

**Figure 22.** A, adult male holotype of *Cyrtodactylus pharbaungensis* sp. nov. (LSUHC 12871) from the type locality of Pharbaung Cave, 38.4 km south-east of Mawlamyine, Mawlamyine District, Mon State, Myanmar. B, adult male paratype (LSUHC 12873) from the type locality.

**Table 13.** Meristic, mensural and colour pattern data from the type series of *Cyrtodactylus pharbaungensis* sp. nov.

|                                                               | LSUHC 12871<br>holotype | LSUHC 12870<br>paratype | BYU 52215<br>paratype |
|---------------------------------------------------------------|-------------------------|-------------------------|-----------------------|
| Sex                                                           | M                       | M                       | M                     |
| Supralabials                                                  | 9                       | 9                       | 9                     |
| Infralabials                                                  | 7                       | 7                       | 7                     |
| Body tubercles low, weakly keeled                             | No                      | No                      | Yes                   |
| Body tubercles raised, moderately to strongly keeled          | Yes                     | Yes                     | No                    |
| Paravertebral tubercles                                       | 29                      | 28                      | 30                    |
| Longitudinal rows of body tubercles                           | 14                      | 14                      | 14                    |
| Tubercles extend beyond base of tail                          | No                      | No                      | No                    |
| Ventral scales                                                | 34                      | 38                      | 36                    |
| Expanded subdigital lamellae on fourth toe                    | 9                       | 7                       | 9                     |
| Unmodified subdigital lamellae on fourth toe                  | 12                      | 14                      | 12                    |
| Total subdigital lamellae on fourth toe                       | 21                      | 21                      | 21                    |
| Enlarged femoral scales (R/L)                                 | 17R17L                  | 12R16L                  | 16RL                  |
| Femoral pores (R/L)                                           | 9R9L                    | 9R11L                   | 9R9L                  |
| Enlarged preloacal scales                                     | 10                      | 11                      | 9                     |
| Precloacal pores                                              | 8                       | 8                       | 5                     |
| Post-precloacal scales rows                                   | 2                       | 2                       | 2                     |
| Enlarged femoral and precloacal scales continuous             | Yes                     | Yes                     | Yes                   |
| Pore-bearing femoral and precloacal scales continuous         | No                      | No                      | No                    |
| Enlarged proximal femoral scales ~1/2 size of distal femorals | No                      | No                      | No                    |
| Medial subcaudals two or three times wider than long          | 3                       | 3                       | 3                     |
| Median subcaudals extend onto lateral subcaudal region        | Yes                     | Yes                     | Yes                   |
| Nuchal loop divided medially                                  | No                      | No                      | No                    |
| Nuchal loop with anterior azygous notch                       | No                      | No                      | No                    |
| Posterior border of nuchal loop                               | Straight                | Straight                | Straight              |
| Band on nape                                                  | Yes                     | Yes                     | Yes                   |
| Dorsal banding with paravertebral elements                    | No                      | No                      | No                    |
| Number of body bands                                          | 6                       | 6                       | 6                     |
| Dorsal bands wider than interspaces                           | No                      | Same                    | No                    |
| Dorsal bands bearing lightened centres                        | Yes                     | Yes                     | Yes                   |
| Dorsal bands edged with light tubercles                       | No                      | No                      | No                    |
| Dorsal band borders                                           | Smooth                  | Smooth                  | Smooth                |
| Dark markings in dorsal interspaces                           | Yes                     | Yes                     | Yes                   |
| Ventrolateral body fold whitish                               | Yes                     | Yes                     | No                    |
| Top of head diffusely mottled, blotched or patternless        | Mottled                 | Mottled                 | Mottled               |
| Light reticulum on top of head                                | No                      | No                      | No                    |
| Anterodorsal margin of thighs darkly pigmented                | No                      | No                      | No                    |
| Anterodorsal margin of brachia darkly pigmented               | Weakly                  | No                      | Yes                   |
| Light caudal bands with dark markings                         | Yes                     | Yes                     | Yes                   |
| Light caudal bands encircle tail                              | No                      | No                      | No                    |
| Number of light caudal bands                                  | 8                       | /                       | 8                     |
| Number of dark caudal bands                                   | 9                       | /                       | 9                     |
| Dark caudal bands wider than light caudal bands               | Variable                | Yes                     | Same                  |
| Mature regenerated tail spotted                               | /                       | /                       | no                    |
| SVL                                                           | 70.4                    | 64.2                    | 68.1                  |
| TL                                                            | 104.0                   | 80.0                    | 35.0                  |
| TW                                                            | 7.1                     | 5.6                     | 6.2                   |
| FL                                                            | 11.8                    | 11.4                    | 11.0                  |
| TBL                                                           | 13.5                    | 12.5                    | 13.6                  |
| AG                                                            | 26.8                    | 29.0                    | 29.6                  |
| HL                                                            | 21.6                    | 18.5                    | 19.8                  |

**Table 13.** *Continued*

|    | LSUHC 12871<br>holotype | LSUHC 12870<br>paratype | BYU 52215<br>paratype |
|----|-------------------------|-------------------------|-----------------------|
| HW | 14.6                    | 12.3                    | 14.0                  |
| HD | 8.2                     | 7.5                     | 8.3                   |
| ED | 5.0                     | 4.6                     | 5.4                   |
| EE | 5.2                     | 4.7                     | 4.7                   |
| ES | 8.9                     | 8.7                     | 8.2                   |
| EN | 7.5                     | 6.6                     | 7.0                   |
| IO | 5.6                     | 4.2                     | 5.6                   |
| EL | 1.8                     | 1.9                     | 2.3                   |
| IN | 1.9                     | 2.2                     | 2.2                   |

Abbreviations are listed in Material and Methods. R, right; L, left; /, data unobtainable or not applicable.

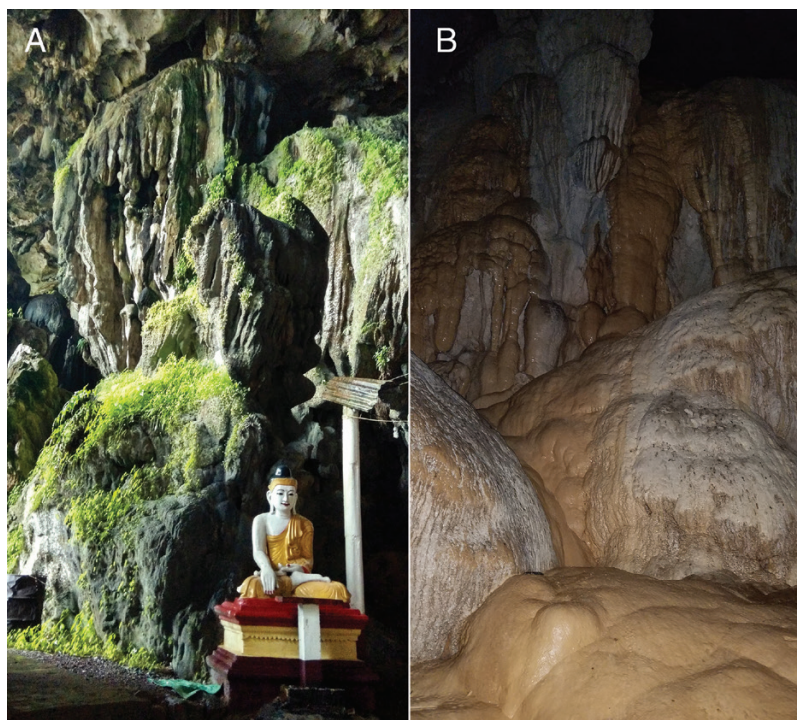

**Figure 23.** A, cave entrance and outside microhabitat structure of the limestone walls of Pharbaung Cave, Mon State. B, microhabitat structure of the interior cave wall of Pharbaung Cave.

is extensive, very dark and airy with several alcoves, cracks and passageways, providing adequate retreat for geckos. The more open interior is crowded by fluted stalactites and stalagmites that are bathed in a thin sheet of running water (Fig. 21). During both day and night, *C. sadansinensis* sp. nov. was found on these cave structures. Amazingly, three of the five specimens collected were found in the flutes of stalagmites of the cave wall with water flowing over their bodies. To our knowledge, this has never been reported for geckos and is an indication that not only do these caves generate and harbour endemic species they also select for novel

life styles. The forest habitat outside the cave is highly disturbed and the vegetation had been cleared, leaving the face vulnerable to direct sunlight during the day (Fig. 21). As such, only one specimen was seen at night on the outside of the cave. *Gekko gekko* was observed on the outside of the cave as well.

*Comparisons:* *Cyrtodactylus sadansinensis* sp. nov. is part of the *sadansinensis* group that includes *C. sadansinensis* and the sister species *C. pharbaungensis* sp. nov. and *C. sanpelensis* sp. nov. (Fig. 9). The PCA and DAPC analyses indicate that

the species of this group are completely separate in morphospace (Fig. 12) where the first two principal components account for 59% of the total variation and load most heavily for longitudinal rows of tubercles, enlarged preloacal scales, and number of unmodified and total number of fourth toe subdigital lamellae (Table S2). These species are even further separated in the DAPC analysis where only the first four components are retained (Fig. S5). Additionally, all three species have statistically significant different mean values for their number of paravertebral tubercles, longitudinal rows of dorsal body tubercles, enlarged femoral scales, enlarged preloacal scales, unmodified subdigital lamellae on the fourth toe, post-preloacal scales rows and preloacal pores, and not lacking pigment in the anterodorsal margins of the thighs and brachia (Table 5). It differs further from *C. pharbaungensis* by not having continuous, enlarged femoral and preloacal scales (Table 8). Varying combinations of other differences between *C. pharbaungensis* sp. nov. and *C. sanpelensis* sp. nov. as well as the other newly described species in the Indo-Chinese clade are presented in Table 8. Genetic distances among the species of this group range from 8.7 to 13.1% (Table 10).

***CYRTODACTYLUS PHARBAUNGENSIS* SP. NOV.**

PHARBAUNG CAVE BENT-TOED GECKO

(FIG. 22; TABLE 13)

*Holotype*: Adult male LSUHC 12871 collected on 7 October 2016 between 1600 and 1500 h by L. Lee Grismer, Marta S. Grismer, Myint Kyaw Thura, Evan S. H. Quah, Perry L. Wood, Jr., Matthew L. Murdoch, Thaw Zin and Htet Kyaw from Pharbaung Cave 38.4 km south-east of Mawlamyine, Mawlamyine District, Mon State, Myanmar (N16°17.118, E97°54.056; 47 m in elevation).

*Paratypes*: Adult males BYU 52215, LSUHC 12870 and 12873 bear the same collection data as the holotype.

*Diagnosis*: *Cyrtodactylus pharbaungensis* sp. nov. differs from all congeners by having the unique combination of nine supralabials; seven infralabials; 12–14 longitudinal rows of body tubercles; 28–30 paravertebral tubercles; 34–38 ventral scales; relatively long digits with 7–9 expanded subdigital lamellae on the fourth toe proximal to the digital inflection, 12–14 unmodified distal subdigital lamellae, 21 total subdigital lamellae; body tuberculation variable; body tubercles not extending beyond base of tail; enlarged femoral and preloacal scales continuous; 28–34 enlarged femoral scales; enlarged femoral scales

generally equal in size; 14–20 femoral pores in males; 9–11 enlarged preloacal scales; 5–8 preloacal pores in males; two rows of enlarged post-preloacal scales; subcaudal scales three times as wide as long, extending onto lateral surface of tail; top of head bearing a dark mottled pattern, no yellow reticulum; nuchal loop divided medially, lacking an anterior, azygous notch, posterior border straight; five or six dark, regularly shaped, dorsal bands narrower than interspaces with lightened centres, not edged with white tubercles; first dorsal band lacking azygous notch; dark markings in dorsal interspaces; ventrolateral folds whitish; anterodorsal margin of thighs and brachia lacking pigment; 6–8 light caudal bands bearing dark markings and not encircling tail; and 7–9 dark caudal bands of varying width relative to light caudal bands.

*Description of holotype*: Adult male SVL 70.4 mm; head moderate in length (HL/SVL 0.31), wide (HW/HL 0.67), flat (HD/HL 0.38), distinct from neck, triangular in dorsal profile; lores inflated, prefrontal region moderately concave, canthus rostralis flattened; snout elongate (ES/HL 0.41), rounded in dorsal profile, flat in lateral profile; eye large (ED/HL 0.23); ear opening round, moderate in size (EL/HL 0.08); eye to ear distance greater than diameter of eye; rostral rectangular, partially divided dorsally by inverted Y-shaped furrow, bordered posteriorly by left and right supranasals and one azygous internasal, laterally by first supralabials; external nares bordered anteriorly by rostral, dorsally by supranasal, posteriorly by two postnasals, ventrally by first supralabial; 9(R,L) square supralabials extending to below midpoint of eye; 7(R,L) infralabials tapering posteriorly to below orbit; scales of rostrum and lores slightly raised, larger than granular scales on top of head and occiput; scales on top of head and occiput not intermixed with tubercles; dorsal superciliaries not elongate or keeled; mental triangular, bordered laterally by first infralabials and posteriorly by large left and right, trapezoidal postmentals contacting medially for 55% of their length posterior to mental; one row of slightly enlarged chinshields bordering all infralabials; and gular and throat scales small, flat, grading posteriorly into larger subimbricate pectoral and ventral scales.

Body relatively short (AG/SVL 0.38) with well-defined ventrolateral folds; dorsal scales small, raised, interspersed with moderately sized, low, subconical, semi-regularly arranged, weakly keeled tubercles; tubercles extend from nape onto base of tail but no farther; tubercles on nape very small, those on posterior portion of body larger, more heavily keeled; approximately 14 longitudinal rows of dorsal body tubercles; 29 paravertebral tubercles; 34 flat, subimbricate, ventral scales larger than dorsal scales; ten enlarged

preloacal scales; eight preloacal pores; two rows of large post-preloacal scales; and no deep, preloacal groove or depression.

Forelimbs moderate in stature, relatively short (FL/SVL 0.17); flat scales of forearm larger than those on body, not interspersed with tubercles; palmar scales flat; digits well-developed, relatively long, inflected at basal, interphalangeal joints; digits much more narrow distal to inflections; claws well-developed, base sheathed by a dorsal and ventral scale; hindlimbs more robust than forelimbs, moderate in length (TBL/SVL 0.19), covered dorsally by granular scales intermixed with larger tubercles and bearing flat, slightly larger scales anteriorly; ventral scales of thigh flat, imbricate, larger than dorsal scales, one row of 17(R,L) enlarged femoral scales in contact with enlarged preloacal scales; 9(R,L) femoral pores; subtibial scales flat, imbricate; small postfemoral scales form an abrupt union with larger, flat ventral scales of posteroventral margin of thigh; plantar scales low, slightly raised; digits relatively long, well-developed, inflected at basal, interphalangeal joints; 9(R,L) transversely expanded subdigital lamellae on fourth toe proximal to joint inflection, 12(R,L) unmodified subdigital lamellae distal to inflection, 21 total subdigital lamellae; and claws well-developed, base sheathed by a dorsal and ventral scale.

Tail original, moderate in proportions, 104.0 mm in length, 7.1 mm in width at base, tapering to a point; dorsal scales of base of tail flat, rapidly becoming larger posteriorly; median row of wide, transversely expanded subcaudal scales three times as wide as long extending onto lateral surface of tail; two enlarged postloacal tubercles at base of tail on hemipenial swellings; and postloacal scales flat.

*Coloration in life* (Fig. 22): Dorsal ground colour of head body, and limbs tan, that of anterior portion of tail dull-yellow; top of head and rostrum bearing dark, diffuse, oval and lineate somewhat mottled pattern, no yellow reticulum; superciliary scales yellow; dark-brown nuchal band distinct, unnotched anteromedially, posterior margin smooth; short band on nape bordered laterally and anterolaterally by large, dark markings; six generally regularly shaped body bands (including nape band) with lightened centres, narrower than interspaces, not edged with light-coloured tubercles; one sacral band; interspaces bearing distinct, dark markings; limbs faintly and irregularly banded; brachia weakly pigmented; dorsal margin of thighs unpigmented; and ventrolateral body folds whitish; nine dark caudal bands bearing lightened centres, of varying width relative to eight light caudal bands; white caudal bands not encircling tail, bearing dark markings; ventral surfaces of head body and limbs beige with stippled lateral edges; and anterior subcaudal region beige, posterior region brown.

*Variation* (Fig. S6): The paratypes differ most notably from the holotype in the distinction of the dorsal markings. BYU 52215 and LSUHC 12873 are generally darker overall and the yellowish tubercles in the interspaces are more visible. The posterior one-half of the tail of LSUHC 12870 is regenerated. Meristic and mensural differences are presented in Table 13.

*Distribution*: *Cyrtodactylus pharbaungensis* sp. nov. is known only from Pharbaung Cave 38.4 km south-east of Mawlamyine, Mawlamyine District, Mon State, Myanmar (Fig. 20).

*Etymology*: The specific epithet, *pharbaungensis* (pronounced *far-bong-ensis*), is a noun in apposition in reference to the type locality of Pharbaung Cave.

*Natural history*: Pharbaung Cave is situated on the north-east side of a small karst hill approximately 70 m wide, 480 m long and 271 m high and is surrounded by paddy fields. The opening of the cave is wide (~50 m)

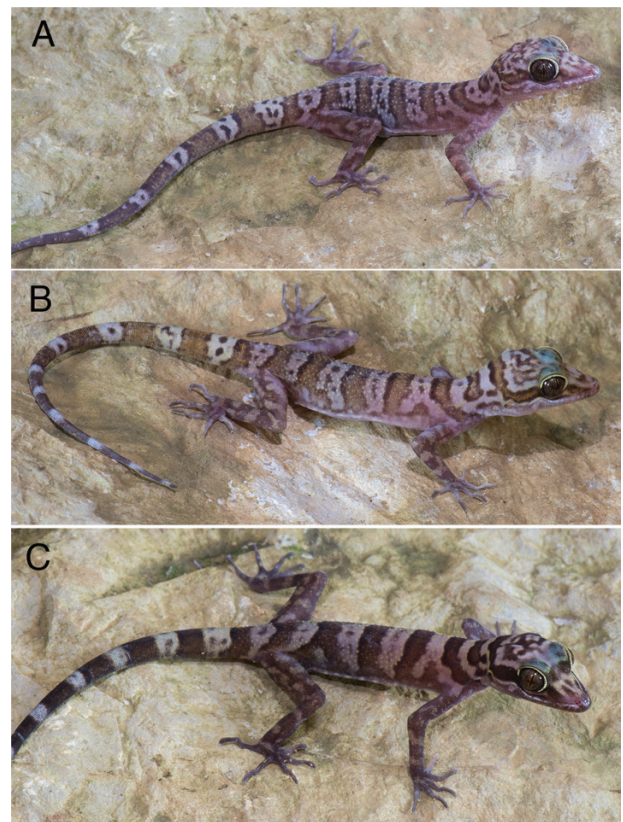

**Figure 24.** Paratypes of *Cyrtodactylus sanpelensis* sp. nov. from the type locality of Sanpel Cave, 21.3 km south-east of Mawlamyine, Mawlamyine District, Mon State, Myanmar illustrating the range of variation in coloration and pattern. A, adult male LSUHC 12878. B, adult male LSUHC 12887. C, adult female LSUHC 12886.

**Table 14.** Meristic, mensural and colour pattern data from the type series of *Cyrtodactylus sanpelenensis* sp. nov.

|                                                               | LSUHC<br>12877 | LSUHC<br>12875 | BYU<br>52221 | LSUHC<br>12878 | LSUHC<br>12879 | LSUHC<br>12880 | LSUHC<br>12881 | BYU<br>52222 |
|---------------------------------------------------------------|----------------|----------------|--------------|----------------|----------------|----------------|----------------|--------------|
|                                                               | holotype       | paratype       | paratype     | paratype       | paratype       | paratype       | paratype       | paratype     |
| Sex                                                           | M              | M              | F            | F              | F              | F              | M              | F            |
| Supralabials                                                  | 10             | 9              | 9            | 10             | 10             | 10             | 9              | 9            |
| Infralabials                                                  | 7              | 7              | 7            | 7              | 8              | 8              | 7              | 7            |
| Body tubercles low, weakly keeled                             | Yes            | Yes            | Yes          | Yes            | Yes            | Yes            | Yes            | Yes          |
| Body tubercles raised, moderately to strongly keeled          | No             | No             | No           | No             | No             | No             | No             | No           |
| Paravertebral tubercles                                       | 28             | 27             | 28           | 28             | 29             | 30             | 29             | 31           |
| Longitudinal rows of body tubercles                           | 14             | 14             | 13           | 13             | 13             | 13             | 14             | 13           |
| Tubercles extend beyond base of tail                          | No             | No             | No           | No             | No             | No             | No             | No           |
| Ventral scales                                                | 37             | 41             | 35           | 40             | 39             | 40             | 35             | 38           |
| Expanded subdigital lamellae on fourth toe                    | 8              | 9              | 8            | 8              | 8              | 9              | 8              | 8            |
| Unmodified subdigital lamellae on fourth toe                  | 13             | 13             | 13           | 12             | 13             | 12             | 13             | 13           |
| Total subdigital lamellae on fourth toe                       | 21             | 22             | 21           | 20             | 21             | 21             | 21             | 21           |
| Enlarged femoral scales                                       | 12R8L          | 8R1L           | 9R11L        | 8R6L           | 8R1L           | 8R1L           | 9R7L           | 8R9L         |
| Femoral pores                                                 | 8R8L           | 5R4L           | /            | /              | /              | /              | 7R6L           | /            |
| Enlarged precolacal scales                                    | 11             | 11             | 11           | 12             | 10             | 11             | 11             | 9            |
| Precloacal pores                                              | 8              | 7              | /            | /              | /              | /              | 7              | /            |
| Post-precloacal scales rows                                   | 2              | 2              | 2            | 2              | 2              | 2              | 2              | 2            |
| Enlarged femoral and precloacal scales continuous             | No             | No             | No           | No             | No             | No             | No             | No           |
| Pore-bearing femoral and precloacal scales continuous         | Yes            | Yes            | Yes          | Yes            | Yes            | Yes            | Yes            | Yes          |
| Enlarged proximal femoral scales ~1/2 size of distal femorals | No             | No             | No           | No             | No             | No             | No             | No           |
| Medial subcaudals two or three times wider than long          | 3              | 3              | 3            | 3              | 3              | 3              | 3              | 3            |
| Medial subcaudals extend onto lateral subcaudal region        | Yes            | Yes            | Yes          | Yes            | Yes            | Yes            | Yes            | Yes          |
| Nuchal loop divided medially                                  | No             | No             | No           | No             | No             | No             | No             | No           |
| Nuchal loop with anterior azygous notch                       | No             | No             | No           | No             | No             | No             | No             | No           |
| Posterior border of nuchal loop                               | Sinuuous       | Straight       | Straight     | Straight       | Straight       | Straight       | Sinuuous       | Sinuuous     |
| Band on nape                                                  | Yes            | Yes            | Yes          | Yes            | Yes            | Yes            | Yes            | Yes          |
| Dorsal banding with paravertebral elements                    | No             | No             | No           | No             | No             | No             | No             | No           |
| Number of body bands                                          | 5              | 5              | 5            | 5              | 5              | 5              | 5              | 5            |
| Dorsal bands wider than interspaces                           | No             | No             | Same         | Same           | No             | No             | No             | No           |
| Dorsal bands bearing lightened centres                        | Yes            | No             | Yes          | Yes            | Yes            | Yes            | Yes            | Yes          |
| Dorsal bands edged with light tubercles                       | No             | No             | No           | No             | No             | No             | No             | No           |

**Table 14.** *Continued*

|                                                        |                            |                            |                          |                            |                            |                            |                            |                          |
|--------------------------------------------------------|----------------------------|----------------------------|--------------------------|----------------------------|----------------------------|----------------------------|----------------------------|--------------------------|
|                                                        | LSUHC<br>12877<br>holotype | LSUHC<br>12875<br>paratype | BYU<br>52221<br>paratype | LSUHC<br>12878<br>paratype | LSUHC<br>12879<br>paratype | LSUHC<br>12880<br>paratype | LSUHC<br>12881<br>paratype | BYU<br>52222<br>paratype |
| Dorsal band borders                                    | Smooth                     | Smooth                     | Smooth                   | Smooth                     | Smooth                     | Smooth                     | Smooth                     | Smooth                   |
| Dark markings in dorsal interspaces                    | Yes                        | Yes                        | Yes                      | Yes                        | Yes                        | Yes                        | Yes                        | Yes                      |
| Ventrrolateral body fold whitish                       | Yes                        | Yes                        | Yes                      | Yes                        | Yes                        | Yes                        | Yes                        | Yes                      |
| Top of head diffusely mottled, blotched or patternless | Mottled                    | Mottled                    | Mottled                  | Mottled                    | Mottled                    | Mottled                    | Mottled                    | Mottled                  |
| Light reticulum on top of head                         | No                         | No                         | No                       | No                         | No                         | No                         | No                         | No                       |
| Anterodorsal margin of thighs darkly pigmented         | No                         | No                         | No                       | No                         | No                         | No                         | No                         | No                       |
| Anterodorsal margin of brachia darkly pigmented        | No                         | No                         | No                       | No                         | No                         | No                         | No                         | No                       |
| Light caudal bands with dark markings                  | Yes                        | Yes                        | Yes                      | Yes                        | Yes                        | Yes                        | Yes                        | Yes                      |
| Light caudal bands encircle tail                       | No                         | No                         | No                       | No                         | No                         | No                         | No                         | No                       |
| Number of light caudal bands                           | /                          | /                          | /                        | /                          | 7                          | 9                          | /                          | 8                        |
| Number of dark caudal bands                            | /                          | /                          | /                        | /                          | 7                          | 10                         | /                          | 8                        |
| Dark caudal bands wider than light caudal bands        | Yes                        | Yes                        | /                        | Yes                        | Yes                        | Yes                        | /                          | Yes                      |
| Mature regenerated tail spotted                        | No                         | No                         | No                       | No                         | No                         | No                         | No                         | No                       |
| SVL                                                    | 70.7                       | 73.9                       | 67.5                     | 68.9                       | 68.1                       | 69.4                       | 69.6                       | 67.9                     |
| TL                                                     | 110.0                      | 107.0                      | 59.0r                    | 98.0                       | 89.0                       | 99.0                       | 85.0                       | 95.0                     |
| TW                                                     | 7.2                        | 7.5                        | 6.5                      | 7.1                        | 6.3                        | 5.9                        | 6.0                        | 6.3                      |
| FL                                                     | 12.4                       | 12.4                       | 12.0                     | 11.6                       | 11.8                       | 11.9                       | 11.4                       | 10.7                     |
| TBL                                                    | 14.7                       | 14.7                       | 14.3                     | 13.6                       | 14.5                       | 14.5                       | 12.4                       | 14.2                     |
| AG                                                     | 30.7                       | 25.8                       | 28.4                     | 28.0                       | 28.9                       | 30.6                       | 30.6                       | 29.0                     |
| HL                                                     | 22.6                       | 21.8                       | 20.3                     | 21.5                       | 20.8                       | 20.9                       | 20.7                       | 21.0                     |
| HW                                                     | 14.6                       | 15.3                       | 13.0                     | 14.6                       | 13.2                       | 13.6                       | 13.5                       | 13.2                     |
| HD                                                     | 9.2                        | 8.5                        | 7.8                      | 8.8                        | 7.4                        | 8.2                        | 8.4                        | 7.7                      |
| ED                                                     | 5.7                        | 5.8                        | 5.1                      | 6.2                        | 5.1                        | 5.5                        | 5.1                        | 5.6                      |
| EE                                                     | 5.4                        | 6.1                        | 4.5                      | 5.6                        | 4.9                        | 4.7                        | 5.1                        | 4.8                      |
| ES                                                     | 10.0                       | 9.7                        | 8.7                      | 9.7                        | 9.6                        | 8.7                        | 8.9                        | 9.0                      |
| EN                                                     | 6.7                        | 6.8                        | 7.1                      | 6.9                        | 7.0                        | 6.1                        | 6.6                        | 7.2                      |
| IO                                                     | 5.6                        | 6.1                        | 5.3                      | 6.1                        | 4.9                        | 5.4                        | 5.9                        | 6.0                      |
| EL                                                     | 2.4                        | 2.5                        | 2.3                      | 2.2                        | 2.6                        | 2.2                        | 2.1                        | 2.6                      |
| IN                                                     | 2.1                        | 2.2                        | 2.3                      | 2.1                        | 2.3                        | 2.1                        | 2.1                        | 2.1                      |
| Sex                                                    | LSUHC 12883 paratype       | BYU 52223 paratype         | LSUHC 12886 paratype     | LSUHC 12885 paratype       | LSUHC 12887 paratype       | BYU 52224 paratype         | LSUHC 12889 paratype       | LSUHC 12890 paratype     |
| Supralabials                                           | M                          | M                          | F                        | /                          | M                          | F                          | M                          | M                        |
| Infralabials                                           | 10                         | 9                          | 9                        | 11                         | 9                          | 10                         | 10                         | 10                       |
|                                                        | 7                          | 7                          | 8                        | 7                          | 8                          | 7                          | 7                          | 8                        |

Table 14. Continued

|                                                               | LSUHC 12883 paratype | BYU 52223 paratype | LSUHC 12886 paratype | LSUHC 12885 paratype | LSUHC 12887 paratype | BYU 52224 paratype | LSUHC 12889 paratype | LSUHC 12890 paratype |
|---------------------------------------------------------------|----------------------|--------------------|----------------------|----------------------|----------------------|--------------------|----------------------|----------------------|
| Body tubercles low, weakly keeled                             | Yes                  | Yes                | Yes                  | Yes                  | Yes                  | Yes                | Yes                  | Yes                  |
| Body tubercles raised, moderate to strongly keeled            | Yes                  | Yes                | Yes                  | Yes                  | Yes                  | Yes                | Yes                  | Yes                  |
| Paravertebral tubercles                                       | 30                   | 31                 | 29                   | 28                   | 29                   | 31                 | 27                   | 28                   |
| Longitudinal rows of tubercles                                | 13                   | 14                 | 13                   | 12                   | 13                   | 13                 | 14                   | 13                   |
| Tubercles extend beyond base of tail                          | No                   | No                 | No                   | No                   | No                   | No                 | No                   | No                   |
| Ventral scales                                                | 38                   | 35                 | 36                   | 36                   | 35                   | 36                 | 36                   | 39                   |
| Expanded subdigital lamellae on fourth toe                    | 9                    | 8                  | 8                    | 8                    | 8                    | 8                  | 9                    | 8                    |
| Unmodified subdigital lamellae on fourth toe                  | 13                   | 13                 | 13                   | 13                   | 12                   | 12                 | 13                   | 12                   |
| Total subdigital lamellae on fourth toe                       | 22                   | 21                 | 21                   | 21                   | 20                   | 20                 | 22                   | 20                   |
| Enlarged femoral scales (R/L)                                 | 9RL                  | 7R8L               | 9R8L                 | 7R8L                 | 10R8L                | 8RL                | 9R7L                 | 8RL                  |
| Femoral pores (R/L)                                           | 6R8L                 | 7R6L               | /                    | /                    | 6R7L                 | /                  | 6R4L                 | 7R6L                 |
| Enlarged precolocal scales                                    | 11                   | 11                 | 11                   | 11                   | 9                    | 9                  | 10                   | 11                   |
| Precloacal pores                                              | 2                    | 7                  | /                    | /                    | 7                    | /                  | 7                    | 8                    |
| Post-precloacal scales rows                                   | 8                    | 2                  | 2                    | 2                    | 2                    | 2                  | 2                    | 2                    |
| Enlarged femoral and precloacal scales continuous             | No                   | No                 | No                   | No                   | No                   | No                 | No                   | No                   |
| Pore-bearing femoral and precloacal scales continuous         | Yes                  | Yes                | Yes                  | Yes                  | Yes                  | Yes                | Yes                  | Yes                  |
| Enlarged proximal femoral scales ~1/2 size of distal femorals | No                   | No                 | No                   | No                   | No                   | No                 | No                   | No                   |
| Medial subcaudal scales two or three times wider than long    | 3                    | 3                  | 3                    | 3                    | 3                    | 3                  | 3                    | 3                    |
| Transverse subcaudal extend onto lateral sub-caudal region    | Yes                  | Yes                | Yes                  | Yes                  | Yes                  | Yes                | Yes                  | Yes                  |
| Nuchal loop divided medially                                  | No                   | No                 | No                   | No                   | No                   | No                 | No                   | No                   |
| Nuchal loop with anterior azygous notch                       | No                   | No                 | No                   | No                   | No                   | No                 | No                   | No                   |
| Posterior border of nuchal loop                               | Sinuuous             | Straight           | Sinuuous             | Sinuuous             | Straight             | Sinuuous           | Straight             | Straight             |
| Band on nape                                                  | Yes                  | Yes                | Yes                  | Yes                  | Yes                  | Yes                | Yes                  | Yes                  |
| Dorsal banding with paravertebral elements                    | No                   | No                 | No                   | No                   | No                   | No                 | No                   | No                   |
| Number of body bands                                          | 5                    | 5                  | 5                    | 4                    | 5                    | 5                  | 5                    | 5                    |
| Dorsal bands wider than interspaces                           | No                   | No                 | Same                 | Same                 | Same                 | No                 | Same                 | Same                 |
| Dorsal bands bearing lightened centres                        | Yes                  | Yes                | Yes                  | Yes                  | Yes                  | Yes                | Yes                  | Yes                  |
| Dorsal bands edged with light tubercles                       | No                   | No                 | No                   | No                   | No                   | No                 | No                   | No                   |
| Dorsal band borders                                           | Smooth               | Smooth             | Smooth               | Smooth               | Smooth               | Smooth             | Smooth               | Smooth               |
| Dark markings in dorsal interspaces                           | Yes                  | Yes                | Yes                  | Yes                  | Yes                  | Yes                | Yes                  | Yes                  |
| Light tubercles in interspaces                                | No                   | No                 | No                   | No                   | No                   | No                 | No                   | No                   |
| Ventrolateral body fold whitish                               | Yes                  | Yes                | Yes                  | Yes                  | Yes                  | Yes                | Yes                  | Yes                  |



**Table 14.** *Continued*

|                                                        | LSUHC 12883 paratype | BYU 52223 paratype | LSUHC 12886 paratype | LSUHC 12885 paratype | LSUHC 12887 paratype | BYU 52224 paratype | LSUHC 12889 paratype | LSUHC 12890 paratype |
|--------------------------------------------------------|----------------------|--------------------|----------------------|----------------------|----------------------|--------------------|----------------------|----------------------|
| Top of head diffusely mottled, blotched or patternless | Mottled              | Mottled            | Mottled              | Mottled              | Mottled              | Mottled            | Mottled              | Mottled              |
| Light reticulum on top of head                         | No                   | No                 | No                   | No                   | No                   | No                 | No                   | No                   |
| Anterodorsal margin of thighs pigmented                | No                   | No                 | No                   | No                   | No                   | No                 | No                   | No                   |
| Anterodorsal margin of brachia pigmented               | No                   | No                 | No                   | No                   | No                   | No                 | No                   | No                   |
| Light caudal bands with dark markings                  | Yes                  | Yes                | Yes                  | Yes                  | Yes                  | Yes                | Yes                  | Yes                  |
| Light caudal bands encircle tail                       | No                   | No                 | No                   | No                   | No                   | No                 | No                   | No                   |
| Number of light bands on tail                          | /                    | /                  | /                    | 8                    | 9                    | /                  | 7                    | 10                   |
| Number of dark bands on tail                           | /                    | /                  | /                    | 7                    | 7                    | /                  | 8                    | 10                   |
| Dark caudal bands wider than light caudal bands        | /                    | /                  | Yes                  | Yes                  | Yes                  | Yes                | Same                 | Yes                  |
| Mature regenerated tail spotted                        | No                   | No                 | No                   | No                   | No                   | No                 | No                   | No                   |
| SVL                                                    | 73.7                 | 73.0               | 60.1                 | 39.2                 | 70.5                 | 68.3               | 68.8                 | 67.5                 |
| TL                                                     | 81.0r                | 95.0r              | 54.0b                | 49.0                 | 107.0                | 102.0r             | 100.0                | 98.0                 |
| TW                                                     | 6.8                  | 5.9                | 5.6                  | 2.7                  | 6.2                  | 6.0                | 6.0                  | 6.2                  |
| FL                                                     | 12.1                 | 12.8               | 10.3                 | 6.7                  | 11.4                 | 11.3               | 11.8                 | 11.7                 |
| TBL                                                    | 14.6                 | 14.6               | 12.9                 | 7.6                  | 14.6                 | 13.7               | 13.9                 | 13.4                 |
| AG                                                     | 29.6                 | 29.5               | 26.1                 | 16.7                 | 30.4                 | 31.1               | 24.3                 | 28.1                 |
| HL                                                     | 22.1                 | 23.3               | 18.7                 | 12.2                 | 21.5                 | 20.4               | 21.7                 | 20.2                 |
| HW                                                     | 15.0                 | 14.0               | 11.8                 | 7.8                  | 14.1                 | 13.6               | 13.8                 | 14.4                 |
| HD                                                     | 8.2                  | 8.4                | 6.8                  | 4.6                  | 7.6                  | 8.0                | 7.9                  | 7.7                  |
| ED                                                     | 5.8                  | 5.0                | 4.2                  | 3.1                  | 5.3                  | 5.2                | 5.3                  | 5.0                  |
| EE                                                     | 5.3                  | 5.0                | 4.8                  | 3.3                  | 5.7                  | 4.7                | 5.5                  | 5.4                  |
| ES                                                     | 9.8                  | 8.8                | 8.4                  | 5.6                  | 8.9                  | 9.1                | 9.3                  | 8.8                  |
| EN                                                     | 7.7                  | 7.1                | 5.2                  | 4.1                  | 7.5                  | 6.8                | 7.0                  | 6.6                  |
| IO                                                     | 6.4                  | 5.2                | 4.4                  | 3.1                  | 5.5                  | 5.9                | 5.8                  | 5.0                  |
| EL                                                     | 2.4                  | 2.0                | 2.2                  | 1.1                  | 1.7                  | 2.1                | 2.2                  | 1.9                  |
| IN                                                     | 2.2                  | 2.0                | 1.5                  | 1.5                  | 2.1                  | 2.2                | 1.9                  | 2.1                  |

Abbreviations are listed in the Material and Methods. R, right; L, left; /, data unobtainable or not applicable; r, regenerated; b, broken.

and high (~20 m) and approximately 60 m above the base of the hill. The interior of the cave is also wide and high with small outcroppings in the centre and alcoves, deep cracks and stalagmites along the walls (Fig. 23). Lizards were observed only along the edges of the walls and not in the middle structures. Some were observed in narrow cracks 1–5 m above the cave floor and others were found crawling across the ground near cracks and small outcroppings into which they could retreat. One specimen was collected on the wall at the cave entrance 1 m above the cave floor. A juvenile was observed in a crack 4–5 m above the cave floor but could not be caught. It is likely that at night, when the cave is darker, lizards utilize all the microhabitat structures. *Hemidactylus garnotii* was observed on the hillside outside the cave.

**Comparisons:** *Cyrtodactylus pharbaungensis* sp. nov. is part of the *sadansinensis* group. The PCA and DAPC analyses indicate that the species of this group are completely separate in morphospace where the first two principal components account for 59% of the total variation (Fig. 12) and load most heavily for longitudinal rows of dorsal body tubercles, enlarged preloacal scales, and number of unmodified and total number of fourth toe lamellae (Table S2). *Cyrtodactylus pharbaungensis* sp. nov. is well-differentiated from *C. sadansinensis* sp. nov. by having statistically significant differences in its mean number of paravertebral tubercles, longitudinal rows of dorsal body tubercles, enlarged femoral scales, enlarged preloacal scales, unmodified subdigital lamellae on the fourth toe, post-preloacal scales rows and preloacal pores and by having continuous, femoral and preloacal scales (Table 8). It is less well-separated from its sister species *C. sanpelensis* sp. nov. by only showing statistically significant differences in its mean number of enlarged femoral scales and femoral pores. However, the enlarged femoral and preloacal scales in *C. pharbaungensis* sp. nov. are continuous and are discontinuous in *C. sanpelensis* sp. nov.; and in *C. pharbaungensis* sp. nov. the dorsal bands are not wider than the interspaces, whereas they are in *C. sanpelensis* sp. nov. (Table 8). Varying combinations of other differences between *C. sadansinensis* sp. nov. and *C. sanpelensis* sp. nov. as well as the other newly described species are presented in Table 7. Genetic distances among the species of this group range from 8.7 to 13.1% (Table 10).

### ***CYRTODACTYLUS SANPELENSIS* SP. NOV.**

SANPEL CAVE BENT-TOED GECKO

(FIG. 24; TABLE 14)

**Holotype:** Adult male LSUHC 12877 collected on 8 October 2016 between 1600 and 2000 h by Myint Kyaw Thura, L. Lee Grismer, Marta S. Grismer, Evan S. H. Quah, Perry L. Wood, Jr., Matthew L. Murdoch, Thaw Zin and Htet Kyaw from Sanpel Cave 21.3 km

south-east of Mawlamyine, Mawlamyine District, Mon State, Myanmar (N16°22.427, E97°46.388; 44 m in elevation).

**Paratypes:** Adult males BYU 52223, LSUHC 12875, 12881, 12883, 12887, 12889–90, adult females BYU 52221–22, 52224, LSUHC 12878–80, 12886 and juvenile LSUHC 12885 bear the same collection data as the holotype.

**Diagnosis:** *Cyrtodactylus sanpelensis* sp. nov. differs from all congeners by having the unique combination of 9–11 supralabials; seven or eight infralabials; 12–14 rows of longitudinal body tubercles; 27–31 paravertebral tubercles; 35–41 ventral scales; relatively long digits with eight or nine expanded subdigital lamellae proximal to the digital inflection on the fourth toe, 12 or 13 unmodified distal subdigital lamellae, 20–22 total subdigital lamellae; low, weakly keeled, dorsal body tubercles; body tubercles not extending beyond base of tail; enlarged femoral and preloacal scales not continuous; 14–20 enlarged femoral scales; 8–16 femoral pores in males; 9–12 enlarged preloacal scales; seven or eight preloacal pores in males; two rows of enlarged post-preloacal scales; median subcaudal scales three times as wide as long, extending onto lateral surface of tail; top of head diffusely mottled, no yellow reticulum; nuchal loop not divided medially, lacking an anterior, azygous notch, posterior border straight or sinuous; five (rarely four), dark, regularly shaped, dorsal bands not wider than interspaces, nearly always with lightened centres, not edged with white tubercles; band on nape present; dark markings in dorsal interspaces; ventrolateral fold not whitish; anterodorsal margin of thighs and brachia unpigmented; 7–10 light caudal bands bearing dark markings, not encircling tail; 7–10 dark caudal bands wider than light caudal bands; and regenerated tail not spotted.

**Description of holotype:** Adult male SVL 70.7 mm; head moderate in length (HL/SVL 0.32), wide (HW/HL 0.65), flat (HD/HL 0.41), distinct from neck, triangular in dorsal profile; lores inflated, prefrontal region moderately concave, canthus rostralis flattened; snout elongate (ES/HL 0.44), rounded in dorsal profile, flat in lateral profile; eye large (ED/HL 0.25); ear opening round, moderate in size (EL/HL 0.11); eye to ear distance greater than diameter of eye; rostral rectangular, partially divided dorsally by inverted Y-shaped furrow, bordered posteriorly by left and right supranasals, one azygous internasal, laterally by first supralabials; external nares bordered anteriorly by rostral, dorsally by supranasal, posteriorly by two postnasals, ventrally by first supralabial; 10(R,L) square supralabials extending to below midpoint

of eye; 8(R)7(L) infralabials tapering posteriorly to below orbit; scales of rostrum and lores slightly raised, larger than granular scales on top of head and occiput; scales on top of head and occiput not intermixed with tubercles; dorsal superciliaries not elongate or keeled; mental triangular, bordered laterally by first infralabials and posteriorly by large left and right trapezoidal postmentals contacting medially for 50% of their length posterior to mental; one row of slightly enlarged chinshields bordering all infralabials; and gular and throat scales small, flat, grading posteriorly into larger, subimbricate, pectoral and ventral scales.

Body relatively short (AG/SVL 0.43) with well-defined ventrolateral folds; dorsal scales small, raised and interspersed with moderately sized, subconical, low, semi-regularly arranged, weakly keeled tubercles; tubercles extend from nape to base of tail but no farther; tubercles absent on nape, tubercles on posterior portion of body largest and more heavily keeled; approximately 14 longitudinal rows of body tubercles; 28 paravertebral tubercles; 37 flat, subimbricate, ventral scales larger than dorsal scales; 11 enlarged, precloacal scales; eight precloacal pores; two rows of large post-precloacal scales; and no deep, precloacal groove or depression.

Forelimbs moderate in stature, relatively short (FL/SVL 0.18); slightly raised scales of forearm larger than those on body, not interspersed with tubercles; palmar scales slightly raised flat; digits well-developed, relatively long, inflected at basal, interphalangeal joints; digits much more narrow distal to inflections; claws well-developed, sheathed by a dorsal and ventral scale at base; hindlimbs more robust than forelimbs, moderate in length (TBL/SVL 0.21), covered dorsally by raised scales intermixed with larger tubercles, bearing flat, slightly larger scales anteriorly; ventral scales of thigh flat, imbricate, larger than dorsal scales, one row of 12(R)8(L) enlarged femoral scales not in contact with enlarged precloacal scales; 8(R,L) femoral pores; subtibial scales flat, imbricate; small postfemoral scales form abrupt union with larger, flat ventral scales of posteroventral margin of thigh; plantar scales low, slightly raised; digits relatively long, well-developed, inflected at basal, interphalangeal joints; 8(R,L) transversely expanded subdigital lamellae on fourth toe proximal to joint inflection, 13(R,L) unmodified subdigital lamellae distal to inflection, 21 total subdigital lamellae; and claws well-developed, base of claw sheathed by a dorsal and ventral scale.

Tail original, moderate in proportions, 110.0 mm in length, 7.2 mm in width at base, tapering to a point; dorsal caudal scales flat; transversely expanded, median subcaudal scales three times as wide as long, extending onto lateral surface of tail; two enlarged

postcloacal tubercles at base of tail on hemipenial swellings; and postcloacal scales flat.

*Coloration in life* (Fig. 24): Dorsal ground colour of head body, limbs and tail magenta; top of head and rostrum diffusely mottled, no yellow reticulum; superciliary scales dull-yellow; dark-brown nuchal band unnotched anteromedially, bearing a sinuous posterior margin; short, hourglass-shaped, band on nape bordered laterally and anterolaterally by diffuse, dark markings; four generally evenly bordered bands on body bearing lightened centres, not wider than interspaces; one sacral band; interspaces bearing distinct dark markings; limbs diffusely and irregularly banded; anterodorsal margins of thighs and brachia not darkly pigmented; ventrolateral body folds whitish; dark caudal bands with lightened centres, wider than light caudal bands; light caudal bands bear dark markings, do not encircle tail; ventral surfaces of head body and limbs beige with stippled lateral edges; and subcaudal region darker, variegated.

*Variation* (Fig. S7): The colour pattern of the paratypes varies little from that of the holotype. LSUHC 12885

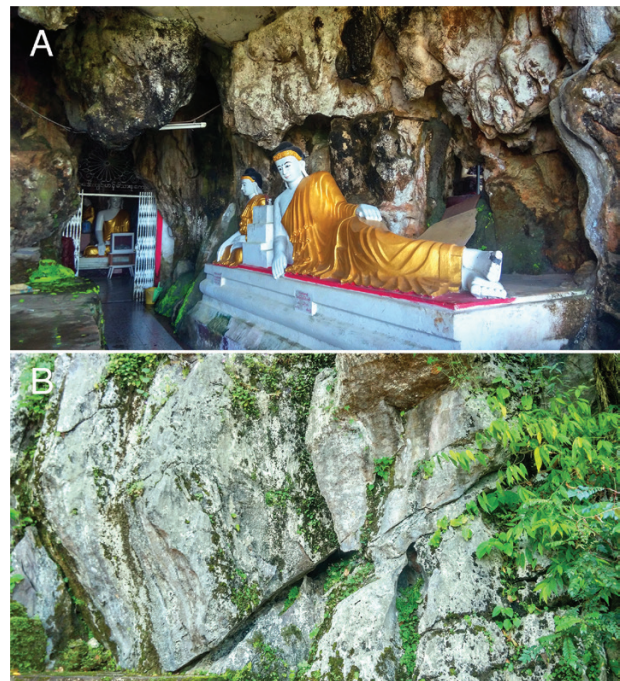

**Figure 25.** A, interior of the entrance of Sanpel Cave, Mawlamyine District, Mon State, Myanmar showing some of the religious statues and cave wall microhabitat on which *Cyrtodactylus sanpelensis* sp. nov. was collected. B, microhabitat structure of the limestone wall outside the entrance to Sanpel Cave.

is a juvenile and has bolder body bands, lacks a nuchal band and has immaculate dorsal interspaces indicating some ontogenetic change in colour pattern is present. LSUHC 12875 is much darker and the interspaces more heavily mottled. The posterior border of the nuchal loop in BYU 52223–24, LSUHC 12875–80, 12887 and 12890 is straight as opposed to sinuous. The lateral sections of the dorsal bands in LSUHC 12886 are quite faded on the flanks. BYU 52221, 5223, LSUHC 12881 and 12883 have partially regenerated tails. Meristic and mensural differences are presented in Table 14.

**Distribution:** *Cyrtodactylus sanpelensis* sp. nov. is known only from Sanpel Cave 21.3 km south-east of Mawlamyine, Mawlamyine District, Mon State, Myanmar (Fig. 20).

**Etymology:** The specific epithet, *sanpelensis*, is a noun in apposition in reference to the type locality of Sanpel Cave.

**Natural history:** Sanpel Cave is situated at the north end of a small karst ridge approximately 53 m wide, 189 m long and 194 m high. The ridge is surrounded by paddy fields and is adjacent to a small, ephemeral river to the east. The opening of the cave is small (~8 m high and ~6 m) and approximately 20 m above the base of the hill. The interior of the cave is complex with many side passages that extend to great depths below the entrance. There are several stalactites, cracks in the walls and side passages that lizards utilize as retreats. Just inside the entrance of the cave are several religious statues on which a number of lizards were collected. Lizards were abundant inside the cave both day and night. After dark, lizards were extremely common on the outside karst hillside that also had an abundance of cracks and holes (Fig. 25). Lizards were even found in well-illuminated areas near the monastery. In essence, there was no rocky habitat that lizards did not utilize. No lizards were seen on vegetation. The juvenile LSUHC 12885 was found on a brick wall. *Gekko gekko* was observed on the outside of the cave.

**Comparisons:** *Cyrtodactylus sanpelensis* sp. nov. is part of the *sadanensis* group. See Comparisons section for *C. sadansinensis* sp. nov. and *C. pharbaungensis* sp. nov.

#### The sinyineensis group

The monophyletic *sinyineensis* group is composed of the sister species *Cyrtodactylus sinyineensis* sp. nov. and *C. welpyanensis* sp. nov., and the sister species *C.*

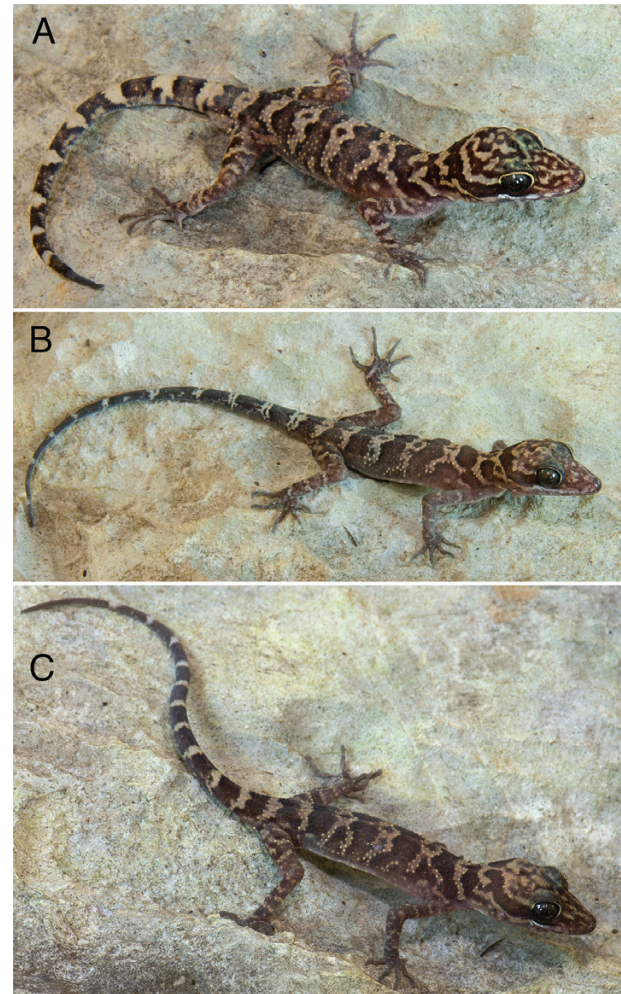

**Figure 26.** Type specimens of *Cyrtodactylus dammathetensis* sp. nov. from the type locality of Dammathet Cave, 38.4 km south-east of Mawlamyine, Mawlamyine District, Mon State, Myanmar showing the range of variation in coloration and pattern. A, adult male holotype (LSUHC 12862). B and C, adult female paratypes LSUHC 12863 and 12864, respectively.

*dammathetensis* sp. nov. and *C. aequalis* Bauer (Fig. 9). This group ranges from the uplands of the southern section of the Shan Hills in Kayin State to the lowland flood plain of the Salween River Basin in Kayin and Mon and states (Fig. 20). It could be argued that *C. tigroides* belongs in this group given it is the sister lineage. However, the deep genetic divergence between *C. tigroides* and the *sinyinensis* group is commensurate with that between the Thai sister lineages of the other Burmese species groups and it is likely that when the phylogenetic relationships of additional Thai species are known, *C. tigroides* will likely align with them in a separate species group as is the case for the *intermedius* group and the *zebraicus* group (Fig. 9). The *sinyineensis*

**Table 15.** Meristic, mensural and colour pattern data from the type series of *Cyrtodactylus dammathetensis* sp. nov.

|                                                               | LSUHC<br>12862<br>holotype | LSUHC<br>12863<br>paratype | LSUHC<br>12864<br>paratype |
|---------------------------------------------------------------|----------------------------|----------------------------|----------------------------|
| Sex                                                           | M                          | F                          | F                          |
| Supralabials                                                  | 9                          | 9                          | 9                          |
| Infralabials                                                  | 8                          | 7                          | 8                          |
| Body tubercles low, weakly keeled                             | No                         | No                         | No                         |
| Body tubercles raised, moderately to strongly keeled          | Yes                        | Yes                        | Yes                        |
| Paravertebral tubercles                                       | 33                         | 31                         | 31                         |
| Longitudinal rows of body tubercles                           | 15                         | 13                         | 15                         |
| Tubercles extend beyond base of tail                          | Yes                        | Yes                        | Yes                        |
| Ventral scales                                                | 27                         | 25                         | 28                         |
| Expanded subdigital lamellae on fourth toe                    | 9                          | 8                          | 9                          |
| Unmodified subdigital lamellae on fourth toe                  | 12                         | 13                         | 12                         |
| Total subdigital lamellae on fourth toe                       | 21                         | 21                         | 21                         |
| Enlarged femoral scales                                       | 18RL                       | 15R16L                     | 16RL                       |
| Femoral pores                                                 | 18RL                       | /                          | /                          |
| Enlarged preloacal scales                                     | 9                          | 8                          | 8                          |
| Precloacal pores                                              | 9                          | /                          | /                          |
| Post-precloacal scales rows                                   | 3                          | 3                          | 3                          |
| Enlarged femoral and precloacal scales continuous             | Yes                        | Yes                        | Yes                        |
| Pore-bearing femoral and precloacal scales continuous         | Yes                        | Yes                        | Yes                        |
| Enlarged proximal femoral scales ~1/2 size of distal femorals | Yes                        | Yes                        | Yes                        |
| Medial subcaudals two or three times wider than long          | 3                          | 3                          | 3                          |
| Medial subcaudals extend onto lateral subcaudal region        | Yes                        | Yes                        | Yes                        |
| Nuchal loop divided medially                                  | No                         | No                         | Yes                        |
| Nuchal loop with anterior azygous notch                       | No                         | No                         | No                         |
| Posterior border of nuchal loop                               | Jagged                     | Jagged                     | Jagged                     |
| Band on nape                                                  | Yes                        | Yes                        | Yes                        |
| Dorsal banding with paravertebral elements                    | Yes                        | Yes                        | Yes                        |
| Number of body bands                                          | 5                          | 5                          | 5                          |
| Dorsal bands wider than interspaces                           | Yes                        | Yes                        | Yes                        |
| Dorsal bands bearing lightened centres                        | No                         | No                         | No                         |
| Dorsal bands edged with light tubercles                       | No                         | No                         | No                         |
| Dorsal band borders                                           | Jagged                     | Jagged                     | Jagged                     |
| Dark markings in dorsal interspaces                           | Yes                        | Yes                        | Yes                        |
| Ventrolateral body fold whitish                               | Faintly                    | Faintly                    | Faintly                    |
| Top of head diffusely mottled, blotched or patternless        | Mottled                    | Mottled                    | Mottled                    |
| Light reticulum on top of head                                | No                         | No                         | No                         |
| Anterodorsal margin of thighs darkly pigmented                | Yes                        | Yes                        | Yes                        |
| Anterodorsal margin of brachia darkly pigmented               | Yes                        | Yes                        | Yes                        |
| Light caudal bands with dark markings                         | No                         | Yes                        | No                         |
| Light caudal bands encircle tail                              | No                         | No                         | No                         |
| Number of light caudal bands                                  | 10                         | 10                         | 11                         |
| Number of dark caudal bands                                   | 10                         | 11                         | 11                         |
| Dark caudal bands wider than light caudal bands               | Yes                        | Yes                        | Yes                        |
| Mature regenerated tail spotted                               | /                          | /                          | /                          |
| SVL                                                           | 69.3                       | 59.8                       | 53.0                       |
| TL                                                            | 80.0r                      | 83.0                       | 76.0                       |
| TW                                                            | 7.9                        | 6.0                        | 5.1                        |
| FL                                                            | 10.9                       | 9.4                        | 9.3                        |
| TBL                                                           | 13.1                       | 11.4                       | 11.4                       |
| AG                                                            | 29.6                       | 24.4                       | 20.6                       |

Table 15. Continued

|    | LSUHC<br>12862<br>holotype | LSUHC<br>12863<br>paratype | LSUHC<br>12864<br>paratype |
|----|----------------------------|----------------------------|----------------------------|
| HL | 20.5                       | 17.1                       | 17.4                       |
| HW | 13.3                       | 11.8                       | 10.8                       |
| HD | 7.8                        | 7.0                        | 6.0                        |
| ED | 5.6                        | 4.4                        | 4.1                        |
| EE | 5.0                        | 4.4                        | 4.2                        |
| ES | 8.5                        | 7.8                        | 7.4                        |
| EN | 6.9                        | 5.6                        | 6.6                        |
| IO | 5.2                        | 4.4                        | 4.7                        |
| EL | 2.2                        | 2.2                        | 1.6                        |
| IN | 2.2                        | 1.9                        | 1.9                        |

Abbreviations are listed in the Material and Methods. R, right; L, left; /, data unobtainable or not applicable; r, regenerated.

group is defined by the following range of characters: 8–10 supralabials; 6–8 infralabials; dorsal body tubercles raised, moderately to strongly keeled, usually extending beyond base of tail; 30–36 paravertebral tubercles; 13–19 longitudinal rows of body tubercles; 19–30 ventral scales; 19–22 total subdigital lamellae; enlarged femoral and precloacal scales continuous; 25–36 enlarged femoral scales nearly the same size throughout; 13–36 femoral pores in males; 5–13 enlarged precloacal scales; 4–9 precloacal pores in males; three post-precloacal scale rows; transverse, median subcaudal scales usually twice as wide as long, not extending onto lateral surface of tail; top of head bearing a dark mottled pattern; no anterior, azygous notch in nuchal loop; dark band on nape; five or six variably shaped body bands generally lacking lightened centres; anterodorsal margins of thighs and brachia darkly pigmented; 9–11 light caudal bands encircling tail; 9–11 dark caudal bands; and maximum SVL 69.3–91.6 mm (Table 8). The description and diagnosis of each new species follows.

#### *CYRTODACTYLUS DAMMATHETENSIS* SP. NOV.

DAMMATHET CAVE BENT-TOED GECKO

(FIG. 26; TABLE 15)

*Holotype*: Adult male LSUHC 12862 collected on 7 October 2016 at 2000 h by Matthew L. Murdoch, L. Lee Grismer, Marta S. Grismer, Myint Kyaw Thura, Evan S. H. Quah, Perry L. Wood, Jr., Thaw Zin and Htet Kyaw from Dammathet Cave 19.8 km east of Mawlamyine, Mawlamyine District, Mon State, Myanmar (N16°30.380, E97°48.629; 25 m in elevation).

*Paratypes*: Adult females LSUHC 12863–64 bear the same collection data as the holotype.

*Diagnosis*: *Cyrtodactylus dammathetensis* sp. nov. differs from all congeners by having the unique combination of nine supralabials; seven or eight infralabials; 13–15 longitudinal rows of body tubercles; 31–33 paravertebral tubercles; 25–28 ventral scales; relatively long digits with eight or nine expanded subdigital lamellae proximal to the digital inflection on the fourth toe, 12 or 13 unmodified distal subdigital lamellae, 21 total subdigital lamellae; raised, moderately keeled, dorsal body tubercles; tubercles extend beyond base of tail; enlarged femoral and precloacal scales continuous; enlarged proximal femoral scales less than one-half the size of enlarged distal femoral scales; 31–36 enlarged femoral scales; 36 femoral pores in males; eight or nine enlarged precloacal scales; nine precloacal pores in males; three rows of enlarged post-precloacal scales; median subcaudal scales three times as wide as long, extending to lateral surface of tail; top of head darkly mottled, no yellow reticulum; nuchal loop variably paired, no pronounced, anterior, azygous notch, posterior border jagged; five jagged, dark, dorsal bands with paravertebral elements, wider than interspaces, lacking lightened centres, not edged with white tubercles; nape band present; dark markings in dorsal interspaces; ventrolateral folds faintly whitish; anterodorsal margins of thighs and brachia darkly pigmented; ten or 11 light caudal bands variably bearing dark markings, not encircling tail; and ten or 11 dark caudal bands wider than light caudal bands.

*Description of holotype*: Adult male SVL 69.3 mm; head moderate in length (HL/SVL 0.30), wide (HW/HL 0.65), flat (HD/HL 0.38), distinct from neck, triangular in dorsal profile; lores inflated, prefrontal region shallowly concave, canthus rostralis rounded; snout elongate (ES/HL 0.41), rounded in dorsal profile, not flat in lateral profile; eye large (ED/HL 0.27); ear opening round, moderate in size (EL/HL 0.11); eye

to ear distance greater than diameter of eye; rostral rectangular, partially divided dorsally by inverted Y-shaped furrow, bordered posteriorly by left and right supranasals and one azygous internasal, laterally by first supralabials; external nares bordered anteriorly by rostral, dorsally by supranasal, posteriorly by three postnasals, ventrally by first supralabial; 9(R,L) square supralabials extending to below midpoint of eye; 8(R)7(L) infralabials tapering posteriorly to below midpoint of eye; scales of rostrum and lores slightly raised, larger than granular scales on top of head and occiput; scales on top of head and occiput intermixed with small tubercles laterally; dorsal superciliaries not elongate or keeled; mental triangular, bordered laterally by first infralabials and posteriorly by large left and right trapezoidal postmentals contacting medially for 65% of their length posterior to mental; one row of slightly enlarged chinshields bordering all infralabials; and gular and throat scales small, flat, grading posteriorly into larger, subimbricate pectoral and ventral scales.

Body relatively short (AG/SVL 0.42) with well-defined ventrolateral folds; dorsal scales small, raised and interspersed with large, subconical, semi-regularly arranged, moderate to strongly keeled tubercles; tubercles extend from nape to beyond base of tail; tubercles on nape smaller than those on posterior portion of body, less sharply keeled; approximately 15 longitudinal rows of body tubercles; 33 paravertebral tubercles; 27 flat, subimbricate, ventral scales larger than dorsal scales; nine enlarged precloacal scales; nine precloacal pores; three rows of large post-precloacal scales; and no deep, precloacal groove or depression.

Forelimbs moderate in stature, relatively short (FL/SVL 0.16); raised scales of forearm larger than those on body, interspersed with small tubercles; palmar scales raised; digits well-developed, relatively long, inflected at basal, interphalangeal joints; digits much more narrow distal to inflections; widened proximal subdigital lamellae do not extend onto palm; claws well-developed, sheathed by a dorsal and ventral scale at base; hindlimbs more robust than forelimbs, moderate in length (TBL/SVL 0.19), covered dorsally by granular scales intermixed with large tubercles and bearing flat, slightly larger scales anteriorly; ventral scales of thigh flat, imbricate, larger than dorsals, one row of 18(R,L) enlarged femoral scales in contact with enlarged precloacal scales; enlarged femoral scales generally equal in size; 18(R,L) femoral pores; subtibial scales flat, imbricate; small postfemoral scales form abrupt union with larger, flat ventral scales of posteroventral margin of thigh; plantar scales raised; digits relatively long, well-developed, inflected at basal, interphalangeal joints; 9(R,L) transversely expanded subdigital lamellae on fourth toe proximal to joint inflection, 12(R,L) unmodified subdigital lamellae distal to inflection, 21 total subdigital lamellae; claws well-developed, base of claw sheathed by a dorsal and ventral scale.

Tail moderate in proportions, 80.0 mm in length, last 10.0 mm regenerated, 7.9 mm in width at base, tapering to a point; dorsal scales of tail flat; median subcaudal scales three as wide as long, extending onto lateral surface of tail; 3(R)4(L) enlarged postcloacal tubercles at base of tail on hemipenial swellings; and postcloacal scales flat.

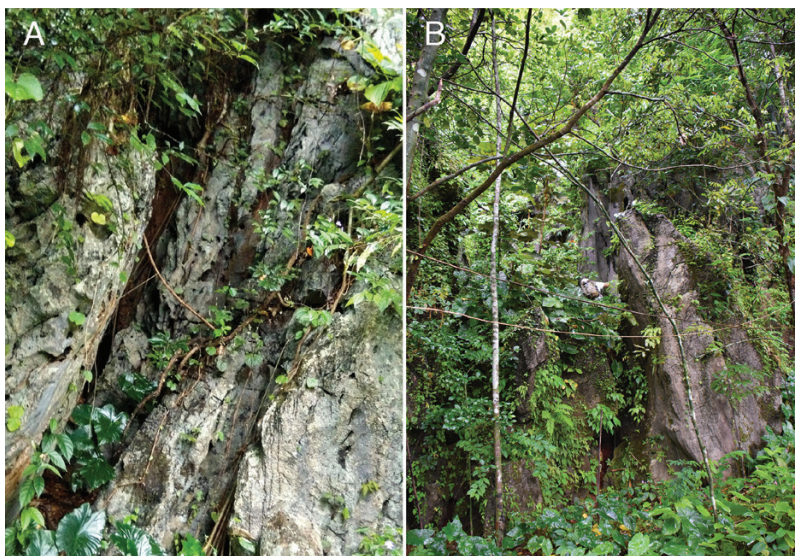

**Figure 27.** A and B, microhabitat structure of the limestone hillside outside Dammathet Cave, Mawlamyine District, Mon State, Myanmar.

*Coloration in life* (Fig. 26): Dorsal ground colour of head body, and limbs tan, that of anterior portion of tail dull-yellow; top of head and rostrum bearing a network of dark-brown, diffuse mottlings, no yellow reticulum; superciliary scales yellow; dark-brown, nuchal band distinct, unnotched anteromedially, and bearing a jagged posterior margin; short, jagged band on nape; five jagged body bands not bearing light centres, wider than interspaces, bearing paravertebral elements; one sacral band; interspaces bearing distinct, dark, medial spot; banding on limbs distinct, irregular; thighs and brachia; ventrolateral body folds faintly whitish; dark caudal bands bear lightened centres, wider than white caudal bands; light caudal bands usually immaculate, not encircling tail; ventral surfaces deeply pigmented, dusky in appearance; subcaudal region dark-brown with lighter mottling.

*Variation* (Fig. S8): The female paratypes differ to varying extents from the holotype in aspects of the dorsal colour pattern. LSUHC 12864 has a paired nuchal loop and dark markings in the lateral regions of the dorsal interspaces. The paravertebral aspects of the dorsal bands are more prominent in the paratypes and in LSUHC 12863 the anteromedial margin of the nuchal loop is nearly notched. Meristic and mensural differences are presented in Table 15.

*Distribution*: *Cyrtodactylus dammathetensis* sp. nov. is known only from Dammathet Cave 19.8 km east

of Mawlamyine, Mawlamyine District, Mon State, Myanmar (Fig. 20).

*Etymology*: The specific epithet, *dammathetensis*, is a noun in apposition in reference to the type locality of Dammathet Cave.

*Natural history*: Dammathet Cave is located immediately south of Dammathet Village and situated on the north end of a thin, westward projecting ridge of a larger karst hill approximately 274 m wide, 1250 m long and 170 m high that is surrounded by paddy fields. The opening of the cave is narrow and behind a locked door controlled by a nearby monastery. The interior of the cave is high (~20 m), open and filled with religious statues and murals along the walls, leaving little in the way of microhabitat for *Cyrtodactylus*. We searched the cave during the afternoon but saw only *Hemidactylus frenatus*. The exterior of the cave along the base of the hill is shaded by vegetation and the limestone is very porous, deeply incised in places, and has several cracks and holes (Fig. 27). We returned here 2 days later after dark and observed four specimens and caught three. All were found on dry surfaces on the karst hillside sheltering from light rain. They were syntopic with *Hemidactylus brookii*.

*Comparisons*: *Cyrtodactylus dammathetensis* sp. nov. is part of the *sinyineensis* group. The PCA and DAPC analyses indicate that the species of this group are completely separate in morphospace where the first two principal components account for 63% of the total variation (Fig. 12) and load most heavily for numbers of infralabials, longitudinal rows of tubercles, expanded subdigital lamellae on the fourth toe and post-preloacal scale rows (Table S3). *Cyrtodactylus dammathetensis* sp. nov. is well-differentiated from *C. aequalis*, *C. sinyineensis* sp. nov. and *C. welpyanensis* sp. nov. by having varying combinations of statistically different mean values of infralabial scales, ventral scales, enlarged femoral scales, post-prepreloacal scale rows, longitudinal rows of body tubercles, preloacal scales and body bands (Table 3). It differs further from *C. sinyineensis* sp. nov. and *C. welpyanensis* sp. nov. in having paravertebral elements in the dorsal banding pattern (Table 8). Morphological and colour pattern differences from other species in the Indo-Chinese clade are listed in Table 8. Genetic distances among the species of this group range from 11.0 to 16.5% (Table 10).

#### *CYRTODACTYLUS SINYINEENSIS* SP. NOV.

SIN YINE CAVE BENT-TOED GECKO

(FIG. 28; TABLE 16)

*Holotype*: Adult male LSUHC 12835 collected on 5 October 2016 at 1600 h by L. Lee Grismer, Perry

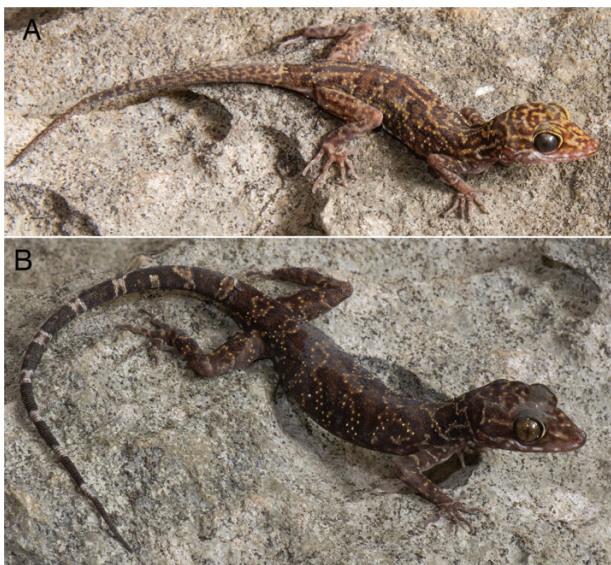

**Figure 28.** Paratypes of *Cyrtodactylus sinyineensis* sp. nov. from the type locality of Sin Yine Cave, 18.5 km south-east of Hpa-an, Hpa-an District, Kayin State, Myanmar showing the range of variation in coloration and pattern. A and B, adult females LSUHC 12837 and 12836, respectively.



**Table 16.** Meristic, mensural and colour pattern data from the type series of *Cyrtodactylus sinyineensis* sp. nov.

|                                                               | LSUHC<br>12835<br>holotype | LSUHC<br>12837<br>paratype | LSUHC<br>12836<br>paratype |
|---------------------------------------------------------------|----------------------------|----------------------------|----------------------------|
| Sex                                                           | M                          | F                          | F                          |
| Supralabials                                                  | 10                         | 9                          | 10                         |
| Infralabials                                                  | 8                          | 8                          | 8                          |
| Body tubercles low, weakly keeled                             | No                         | No                         | No                         |
| Body tubercles raised, moderately to strongly keeled          | Yes                        | Yes                        | Yes                        |
| Paravertebral tubercles                                       | 33                         | 35                         | 33                         |
| Longitudinal rows of body tubercles                           | 15                         | 15                         | 15                         |
| Tubercles extend beyond base of tail                          | Yes                        | Yes                        | Yes                        |
| Ventral scales                                                | 27                         | 29                         | 28                         |
| Expanded subdigital lamellae on fourth toe                    | 8                          | 10                         | 9                          |
| Unmodified subdigital lamellae on fourth toe                  | 11                         | 11                         | 12                         |
| Total subdigital lamellae on fourth toe                       | 19                         | 21                         | 21                         |
| Enlarged femoral scales (R/L)                                 | 13RL                       | 14R13L                     | 13RL                       |
| Femoral pores (R/L)                                           | 9RL                        | /                          | /                          |
| Enlarged preloacal scales                                     | 10                         | 11                         | 12                         |
| Precloacal pores                                              | 5                          | /                          | /                          |
| Post-precloacal scales rows                                   | 3                          | 3                          | 3                          |
| Enlarged femoral and precloacal scales continuous             | Yes                        | Yes                        | Yes                        |
| Pore-bearing femoral and precloacal scales continuous         | No                         | No                         | No                         |
| Enlarged proximal femoral scales ~1/2 size of distal femorals | No                         | No                         | No                         |
| Medial subcaudals two or three times wider than long          | /                          | 2                          | 2                          |
| Medial subcaudals extend onto lateral subcaudal region        | No                         | No                         | No                         |
| Nuchal loop divided medially                                  | No                         | No                         | No                         |
| Nuchal loop with anterior azygous notch                       | No                         | No                         | No                         |
| Posterior border of nuchal loop                               | Jagged                     | Jagged                     | Jagged                     |
| Band on nape                                                  | Yes                        | Yes                        | Yes                        |
| Dorsal banding with paravertebral elements                    | No                         | No                         | No                         |
| Number of body bands                                          | 6                          | /                          | 5                          |
| Dorsal bands wider than interspaces                           | Yes                        | Yes                        | Yes                        |
| Dorsal bands bearing lightened centres                        | Weak                       | Weak                       | Weak                       |
| Dorsal bands edged with light tubercles                       | Weak                       | Yes                        | Yes                        |
| Dorsal band borders                                           | Jagged                     | Jagged                     | Jagged                     |
| Dark markings in dorsal interspaces                           | Yes                        | Yes                        | Yes                        |
| Ventrolateral body fold whitish                               | No                         | No                         | No                         |
| Top of head diffusely mottled, blotched or patternless        | Mottled                    | Mottled                    | Mottled                    |
| Light reticulum on top of head                                | No                         | No                         | No                         |
| Anterodorsal margin of thighs darkly pigmented                | Yes                        | Yes                        | Yes                        |
| Anterodorsal margin of brachia darkly pigmented               | Yes                        | Yes                        | Yes                        |
| Light caudal bands with dark markings                         | /                          | Yes                        | Yes                        |
| Light caudal bands encircle tail                              | /                          | No                         | No                         |
| Number of light caudal bands                                  | /                          | /                          | 9                          |
| Number of dark caudal bands                                   | /                          | /                          | 9                          |
| Dark caudal bands wider than light caudal bands               | /                          | Yes                        | Yes                        |
| Mature regenerated tail spotted                               | /                          | No                         | /                          |
| SVL                                                           | 88.3                       | 91.6                       | 86.2                       |
| TL                                                            | 58.9                       | 93.0                       | 126.0                      |
| TW                                                            | 9.8                        | 8.2                        | 8.2                        |
| FL                                                            | 14.4                       | 14.3                       | 13.6                       |
| TBL                                                           | 17.2                       | 17.6                       | 15.4                       |
| AG                                                            | 39.0                       | 44.2                       | 40.4                       |

Table 16. Continued

|    | LSUHC<br>12835<br>holotype | LSUHC<br>12837<br>paratype | LSUHC<br>12836<br>paratype |
|----|----------------------------|----------------------------|----------------------------|
| HL | 26.4                       | 26.7                       | 24.2                       |
| HW | 17.3                       | 18.2                       | 17.3                       |
| HD | 10.3                       | 11.1                       | 10.1                       |
| ED | 6.5                        | 6.7                        | 6.0                        |
| EE | 6.2                        | 6.8                        | 6.4                        |
| ES | 10.4                       | 11.0                       | 10.4                       |
| EN | 8.8                        | 8.1                        | 8.7                        |
| IO | 7.3                        | 8.4                        | 9.0                        |
| EL | 3.3                        | 3.9                        | 2.9                        |
| IN | 2.9                        | 2.8                        | 2.8                        |

Abbreviations are listed in the Material and Methods. R, right; L, left; /, data unobtainable or not applicable.

L. Wood, Jr., Matthew L. Murdoch, Myint Kyaw Thura, Evan S. H. Quah, Thaw Zin, Htet Kyaw and Marta S. Grismer from Sin Yine Cave 18.5 km south-east of Hpa-an, Hpa-an District, Kayin State, Myanmar (N16°44.605, E97°29.493; 26 m in elevation).

*Paratypes:* Adult females LSUHC 12836–37 bear the same collection data as the holotype.

*Diagnosis:* *Cyrtodactylus sinyineensis* sp. nov. differs from all congeners by having the unique combination of nine or ten supralabials; eight infralabials; 15 longitudinal rows of body tubercles; 33–35 paravertebral tubercles; 27–29 ventral scales; relatively long digits with 8–10 expanded subdigital lamellae proximal to the digital inflection on the fourth toe, 11 or 12 unmodified, distal, subdigital lamellae; 19–21 total subdigital lamellae; raised, moderate to strongly keeled, dorsal body tubercles extending beyond base of tail; enlarged femoral and preloacal scales continuous; 26 or 27 enlarged femoral scales nearly equal in size; 18 femoral pores in males; 10–12 enlarged preloacal scales; five preloacal pores in males; three rows of enlarged, post-preloacal scales; median subcaudal scales twice as wide as long, not extending onto lateral surface of tail; top of head bearing diffuse dark mottling, no yellow reticulum; nuchal loop not divided medially, lacking an anterior, azygous notch, posterior border jagged; five or six dark, jagged dorsal bands wider than interspaces bearing weakly lightened centres, edged with yellow tubercles; nape band present; dark markings in dorsal interspaces variable; ventrolateral folds not whitish; anterodorsal margins of thighs and brachia darkly pigmented; nine light-coloured, caudal bands bearing dark markings, not encircling tail; and nine dark caudal bands wider than light caudal bands.

*Description of holotype:* Adult male SVL 88.3 mm; head moderate in length (HL/SVL 0.30), wide (HW/HL 0.65), flat (HD/HL 0.39), distinct from neck, triangular in dorsal profile; lores inflated, prefrontal region shallowly concave, canthus rostralis rounded; snout elongate (ES/HL 0.39), rounded in dorsal profile, not flat in lateral profile; eye large (ED/HL 0.25); ear opening round, moderate in size (EL/HL 0.12); eye to ear distance greater than diameter of eye; rostral rectangular, partially divided dorsally by inverted Y-shaped furrow, bordered posteriorly by left and right large supranasals meeting on midline, laterally by first supralabials; external nares bordered anteriorly by rostral, dorsally by supranasal, posteriorly by two postnasals, ventrally by first supralabial; 10(R)9(L) square supralabials extending to below midpoint of eye; 8(R,L) infralabials tapering posteriorly to below orbit; scales of rostrum and lores slightly raised, larger than granular scales on top of head and occiput; scales on top of head and occiput intermixed with small tubercles; dorsal superciliaries not elongate or keeled; mental triangular, bordered laterally by first infralabials and posteriorly by large left and right trapezoidal postmentals contacting for 65% of their length posterior to mental; one row of slightly enlarged chinshields bordering all infralabials; and gular and throat scales small, flat, grading posteriorly into larger, subimbricate, pectoral and ventral scales.

Body relatively short (AG/SVL 0.44) with well-defined ventrolateral folds; dorsal scales small, raised and interspersed with large, conical, semi-regularly arranged to strongly keeled tubercles; tubercles extend from nape to beyond base of tail; tubercles on nape smaller than those on posterior portion of body; approximately 15 longitudinal rows of body tubercles; 33 paravertebral tubercles; 27 flat, subimbricate, ventral scales larger than dorsal scales;

ten enlarged precloacal scales; five precloacal pores; three rows of large, post-precloacal scales; and no deep, precloacal groove or depression.

Forelimbs moderate in stature, relatively short (FL/SVL 0.16); flat scales of forearm larger than those on body, not interspersed with small tubercles; palmar scales flat; digits well-developed, relatively long, inflected at basal, interphalangeal joints; digits much more narrow distal to inflections; expanded, proximal, subdigital lamellae do not extend onto palm; claws well-developed, sheathed by a dorsal and ventral scale at base; hindlimbs more robust than forelimbs, moderate in length (TBL/SVL 0.19), covered dorsally by granular scales intermixed with large tubercles and bearing flat, slightly larger scales anteriorly; ventral scales of thigh flat, imbricate, larger than dorsals, one row of 13(R,L) nearly equally sized, enlarged femoral scales in contact with enlarged precloacal scales; 9(R,L) femoral pores; subtibial scales flat, imbricate; small postfemoral scales form abrupt union with larger, flat ventral scales of posteroventral margin of thigh; plantar scales slightly raised; digits relatively long, well-developed, inflected at basal, interphalangeal joints; 8(R,L) transversely expanded subdigital lamellae on fourth toe, 11(R,L) unmodified subdigital lamellae distal to inflection, 19 total subdigital lamellae; and claws well-developed, base of claw sheathed by a dorsal and ventral scale.

Tail regenerated, 58.9 mm in length, 9.8 mm in width at base, tapering to a point; dorsal scales of tail flat; 3(R,L) enlarged postcloacal tubercles at base of tail on hemipenial swellings; and postcloacal scales flat.

*Coloration in life:* Dorsal ground colour of head body, and limbs dark-brown, that of posterior portion of tail whitish; top of head and rostrum darkly mottled bearing a network of diffuse, yellow markings but no reticulum; superciliary scales yellow; dark-brown, nuchal band distinct, unnotched anteromedially, bearing a jagged posterior margin; large, dark, paravertebral markings on nape; six jagged body bands bearing weakly lightened centres, wider than interspaces; one incomplete sacral band; interspaces bearing diffuse, dark markings; limbs darkly mottled not banded; thighs and brachia, darkly pigmented; ventrolateral body folds not whitish; and ventral surfaces pigmented, dusky in appearance.

*Variation (Fig. 28; Fig. S9):* The female paratypes differ to varying extents from the holotype in aspects of the dorsal colour pattern. LSUHC 12836 has a complete tail with a median row of wide, transversely expanded subcaudal scales twice as wide as long; nine dark caudal bands bearing lightened centres, wider than light caudal bands; nine light caudal bands with dark

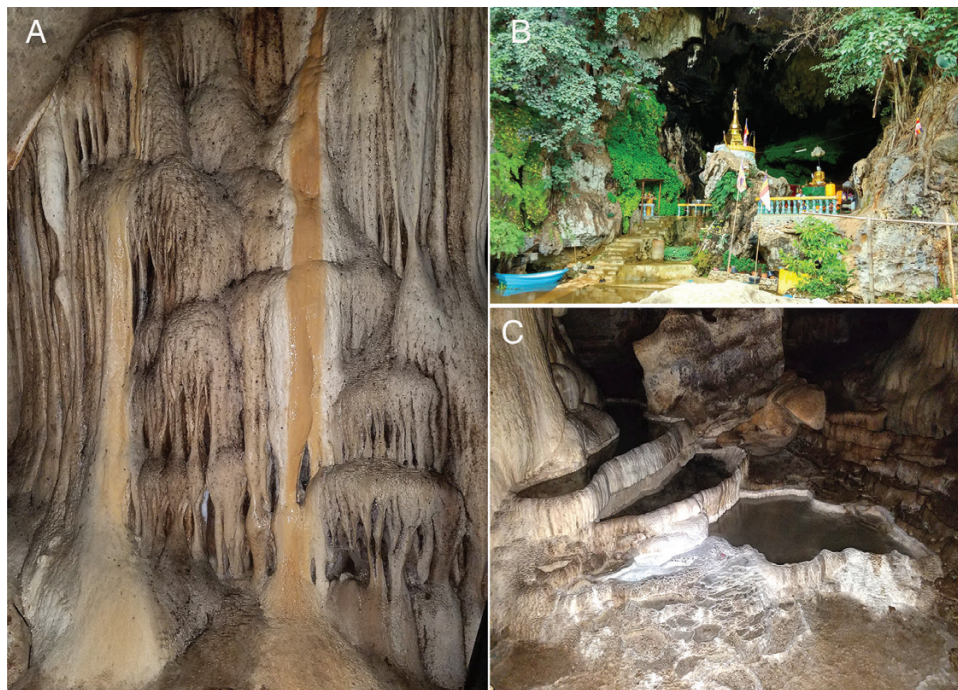

**Figure 29.** A, microhabitat structure of stalactites along the cave wall inside Sin Yine Cave, 18.5 km south-east of Hpa-an, Hpa-an District, Kayin State, Myanmar. B, entrance to Sin Yine Cave. C, microhabitat structure on the floor of Sin Yine Cave.

spots, not encircling tail; and a dark-brown subcaudal region. LSUHC 12837 has lineate components to its dorsal pattern with a generally yellow hue and a regenerated tail with dark, irregularly shaped markings. Meristic differences are listed in Table 16.

**Distribution:** *Cyrtodactylus sinyineensis* sp. nov. is known only from Sin Yine Cave 18.5 km south-east of Hpa-an, Hpa-an District, Kayin State, Myanmar (Fig. 20).

**Etymology:** The specific epithet, *sinyineensis*, is a noun in apposition in reference to the type locality of Sin Yine Cave.

**Natural history:** Sin Yine Cave is situated on the south end of a large, isolated, karst hill approximately 3.6 km wide, 16.4 km long and 338 m high that is surrounded by paddy fields and located immediately south-east of Hpa-an. Sin Yine Cave is connected to Sadan Cave as they occur along the same, semicircular karst ridge. The mouth of Sin Yine Cave is approximately 700 m away from the southern opening of Sadan Cave across an ephemerally flooded paddy field. The interior of the Sin

Yine Cave is wide (~25 m) and it has the appropriate microhabitat (fluted stalactites and stalagmites, alcoves, cracks, small side caves, etc.) necessary for *Cyrtodactylus* (Fig. 29). A total of three specimens were collected: LSUHC 12837 was 1 m above the cave floor on a stalagmite with water flowing down its face; LSUHC 12835 was seen running across the ground through water at the base of a stalagmite; and LSUHC 12836 was found 2 m above the cave floor on the cave wall. All lizards were found in close proximity (~15 m) to one another in near total darkness, approximately 100 m from the cave entrance.

**Comparisons:** *Cyrtodactylus sinyineensis* sp. nov. is part of the *sinyineensis* group. The PCA and DAPC analyses indicate that the species of this group are completely separate in morphospace where the first two principal components account for 63% of the total variation (Fig. 12) and load most heavily for numbers of infralabials, longitudinal rows of body tubercles, expanded subdigital fourth toe lamellae and post-preloacal scale rows (Table S3). *Cyrtodactylus sinyineensis* sp. nov. is well-differentiated from *C. aequalis*, *C. dammanthaensis* sp. nov. and *C. welpyanensis* sp. nov. by having varying combinations of statistically different mean values of infralabials, supralabials, ventral scales, enlarged femoral scales, preloacal scales; and longitudinal rows of body tubercles (Table 3). It differs further from its sister species, *C. welpyanensis* sp. nov., by having dorsal bands edged with light tubercles and having a maximum SVL of 91.6 mm vs. 70.6 mm. It differs further from *C. dammathetensis*, and *C. aequalis* by lacking paravertebral elements in the dorsal banding pattern (Table 8). Morphological and colour pattern differences from other species in the Indo-Chinese clade are listed in Table 8. Genetic distances among the species of this group range from 11.0 to 16.5% (Table 10).

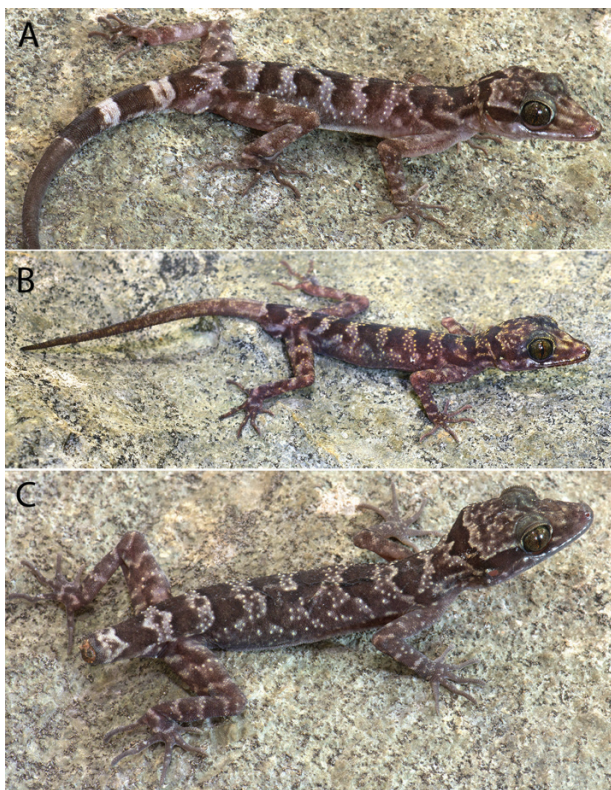

**Figure 30.** Type specimens of *Cyrtodactylus welpyanensis* sp. nov. from the type locality of Welpyan Cave 35, km north of Hpa-an, Hpa-an District, Kayin State, Myanmar. A, adult male holotype (LSUHC 12784). B and C, adult female paratypes LSUHC 12886 and 12785, respectively.

#### ***CYRTODACTYLUS WELPYANENSIS* SP. NOV.**

WEL PYAN CAVE BENT-TOED GECKO

(FIG. 30; TABLE 17)

**Holotype:** Adult male LSUHC 12874 collected on 3 October 2016 at 1500 h by Myint Kyaw Thura, L. Lee Grismer, Perry L. Wood, Jr., Matthew L. Murdoch, Evan S. H. Quah, Thaw Zin, Htet Kyaw and Marta S. Grismer from Wel Pyan Cave 35 km north of Hpa-an, Hpa-an District, Kayin State, Myanmar (N17°12.188, E97°37.066; 21 m in elevation).

**Paratypes:** Adult female LSUHC 12785 and adult male 12786 bear the same collection data as the holotype.

**Table 17.** Meristic, mensural and colour pattern data from the type series of *Cyrtodactylus weltpyanensis* sp. nov.

|                                                               | LSUHC<br>12784<br>holotype | LSUHC<br>12785<br>paratype | LSUHC<br>12786<br>paratype |
|---------------------------------------------------------------|----------------------------|----------------------------|----------------------------|
| Sex                                                           | M                          | F                          | M                          |
| Supralabials                                                  | 8                          | 8                          | 9                          |
| Infralabials                                                  | 7                          | 7                          | 7                          |
| Body tubercles low, weakly keeled                             | No                         | No                         | No                         |
| Body tubercles raised, moderately to strongly keeled          | Yes                        | Yes                        | Yes                        |
| Paravertebral tubercles                                       | 30                         | 33                         | 32                         |
| Longitudinal rows of body tubercles                           | 16                         | 16                         | 16                         |
| Tubercles extend beyond base of tail                          | No                         | /                          | /                          |
| Ventral scales                                                | 30                         | 30                         | 28                         |
| Expanded subdigital lamellae on fourth toe                    | 8                          | 8                          | 8                          |
| Unmodified subdigital lamellae on fourth toe                  | 11                         | 13                         | 12                         |
| Total subdigital lamellae on fourth toe                       | 19                         | 21                         | 20                         |
| Enlarged femoral scales (R/L)                                 | 14R16L                     | 14R16L                     | 17R14L                     |
| Femoral pores (R/L)                                           | 7R9L                       | /                          | 8RL                        |
| Enlarged preloacal scales                                     | 11                         | 12                         | 13                         |
| Precloacal pores                                              | 7                          | /                          | 8                          |
| Post-precloacal scales rows                                   | 3                          | 3                          | 3                          |
| Enlarged femoral and precloacal scales continuous             | Yes                        | Yes                        | Yes                        |
| Pore-bearing femoral and precloacal scales continuous         | No                         | No                         | No                         |
| Enlarged proximal femoral scales ~1/2 size of distal femorals | No                         | No                         | No                         |
| Medial subcaudals two or three times wider than long          | 2                          | /                          | 2                          |
| Medial subcaudals extend onto lateral subcaudal region        | No                         | No                         | No                         |
| Nuchal loop divided medially                                  | No                         | No                         | No                         |
| Nuchal loop with anterior azygous notch                       | No                         | No                         | No                         |
| Posterior border of nuchal loop                               | Jagged                     | Jagged                     | Jagged                     |
| Band on nape                                                  | Yes                        | Yes                        | Yes                        |
| Dorsal banding with paravertebral elements                    | No                         | No                         | No                         |
| Number of body bands                                          | 6                          | 6                          | 6                          |
| Dorsal bands wider than interspaces                           | Yes                        | Yes                        | Yes                        |
| Dorsal bands bearing lightened centres                        | No                         | No                         | No                         |
| Dorsal bands edged with light tubercles                       | No                         | No                         | No                         |
| Dorsal band borders                                           | Jagged                     | Jagged                     | Jagged                     |
| Dark markings in dorsal interspaces                           | Yes                        | Yes                        | Yes                        |
| Ventrolateral body fold whitish                               | Yes                        | Yes                        | Yes                        |
| Top of head diffusely mottled, blotched or patternless        | Mottled                    | Mottled                    | Mottled                    |
| Light reticulum on top of head                                | No                         | No                         | No                         |
| Anterodorsal margin of thighs darkly pigment                  | Yes                        | Yes                        | Yes                        |
| Anterodorsal margin of brachia darkly pigment                 | Yes                        | Yes                        | Yes                        |
| Light caudal bands with dark markings                         | Yes                        | Yes                        | /                          |
| Light caudal bands encircle tail                              | No                         | No                         | /                          |
| Number of light caudal bands                                  | /                          | 9                          | /                          |
| Number of dark caudal bands                                   | /                          | 10                         | /                          |
| Dark caudal bands wider than light caudal bands               | Yes                        | Yes                        | /                          |
| Mature regenerated tail spotted                               | No                         | No                         | No                         |
| SVL                                                           | 69.2                       | 70.6                       | 68.9                       |
| TL                                                            | 86.0r                      | 73.0b                      | 72.0                       |
| TW                                                            | 6.8                        | 6.7                        | 7.0                        |
| FL                                                            | 11.9                       | 11.9                       | 12.1                       |
| TBL                                                           | 13.9                       | 12.9                       | 13.8                       |
| AG                                                            | 31.5                       | 29.4                       | 27.9                       |

Table 17. Continued

|    | LSUHC<br>12784<br>holotype | LSUHC<br>12785<br>paratype | LSUHC<br>12786<br>paratype |
|----|----------------------------|----------------------------|----------------------------|
| HL | 20.8                       | 21.1                       | 19.5                       |
| HW | 13.0                       | 13.4                       | 13.4                       |
| HD | 7.8                        | 7.4                        | 7.7                        |
| ED | 5.7                        | 5.2                        | 5.2                        |
| EE | 4.9                        | 5.3                        | 4.5                        |
| ES | 8.7                        | 8.4                        | 9.3                        |
| EN | 6.7                        | 6.5                        | 6.5                        |
| IO | 5.2                        | 5.6                        | 5.2                        |
| EL | 1.7                        | 2.5                        | 1.9                        |
| IN | 2.1                        | 2.5                        | 2.5                        |

Abbreviations are listed in the Material and Methods. R, right; L, left; /, data unobtainable or not applicable; r, regenerated; b, broken.

*Diagnosis:* *Cyrtodactylus welpyanensis* sp. nov. differs from all congeners by having the unique combination of eight or nine supralabials; seven infralabials; 16 longitudinal rows of body tubercles; 30–33 paravertebral tubercles; 28–30 ventral scales; relatively long digits with eight expanded subdigital lamellae proximal to the digital inflection on the fourth toe, 11–13 unmodified, distal, subdigital lamellae, 19–21 total subdigital lamellae; raised, moderate to strongly keeled, dorsal body tubercles not extending beyond base of tail; enlarged femoral and preloacal scales continuous; 30–31 nearly equally sized, enlarged, femoral scales; 16 femoral pores in males; 11–13 enlarged preloacal scales; 7–8 preloacal pores in males; three rows of enlarged post-preloacal scales; subcaudal scales twice as wide as long, not extending onto lateral surface of tail; top of head darkly mottled, no yellow reticulum; nuchal loop not divided medially, lacking an anterior, azygous notch, posterior border jagged; six dark dorsal bands lacking paravertebral elements, wider than interspaces, lacking lightened centres, not edged with white tubercles; nape band present; dark markings in dorsal interspaces; ventrolateral folds whitish; anterodorsal margins of thighs and brachia darkly pigmented; nine light caudal bands bearing dark markings, not encircling tail; ten dark caudal bands wider than light caudal bands; and mature regenerated tail unicolour.

*Description of holotype:* Adult male SVL 69.2 mm; head moderate in length (HL/SVL 0.30), wide (HW/HL 0.62), flat (HD/HL 0.37), distinct from neck, triangular in dorsal profile; lores inflated, prefrontal region shallowly concave, canthus rostralis rounded; snout elongate (ES/HL 0.42), rounded in dorsal profile, not flat in lateral profile; eye large (ED/HL 0.28); ear opening round, moderate in size (EL/HL 0.08); eye

to ear distance greater than diameter of eye; rostral rectangular, partially divided dorsally by inverted Y-shaped furrow, bordered posteriorly by left and right supranasals and one azygous internasal, laterally by first supralabials; external nares bordered anteriorly by rostral, dorsally by supranasal, posteriorly by two postnasals and ventrally by first supralabial; 8(R)10(L) square supralabials extending to below midpoint of eye; 7(R,L) infralabials tapering posteriorly to below orbit; scales of rostrum and lores slightly raised, larger than granular scales on top of head and occiput; scales on top of head and occiput intermixed with small tubercles laterally; dorsal superciliaries not elongate or keeled; mental triangular, bordered laterally by first infralabials and posteriorly by large left and right trapezoidal postmentals contacting for 45% of their length posterior to mental; one row of slightly enlarged, chinshields bordering all infralabials; and gular and throat scales small, flat, grading posteriorly into larger, subimbricate pectoral and ventral scales.

Body relatively short (AG/SVL 0.46) with well-defined, ventrolateral folds; dorsal scales small, raised and interspersed with large, subconical, semi-regularly arranged, moderate to strongly keeled tubercles; tubercles extend from nape to base of tail but no farther; tubercles on nape smaller than those on posterior portion of body and less sharply keeled; approximately 16 longitudinal rows of body tubercles; 30 paravertebral tubercles; 30 flat, subimbricate, ventral scales larger than dorsal scales; 11 enlarged preloacal scales; seven preloacal pores; three rows of large post-preloacal scales; and no deep, preloacal groove or depression.

Forelimbs moderate in stature, relatively short (FL/SVL 0.17); flat scales of forearm larger than those on body, not interspersed with small tubercles; palmar scales flat; digits well-developed, relatively long,

inflected at basal, interphalangeal joints; digits much more narrow distal to inflections; widened, proximal, subdigital lamellae do not extend onto palm; claws well-developed, sheathed by a dorsal and ventral scale at base; hindlimbs more robust than forelimbs, moderate in length (TBL/SVL 0.20), covered dorsally by raised scales intermixed with large tubercles; flat, slightly larger scales anteriorly; ventral scales of thigh flat, imbricate, larger than dorsal scales, one row of 14(R)16(L) nearly equally sized, enlarged, femoral scales in contact with enlarged precloacal scales; 7(R)9(L) femoral pores; subtibial scales flat, imbricate; small, postfemoral scales form abrupt union with larger, flat ventral scales of posteroventral margin of thigh; plantar scales raised; digits relatively long, well-developed, inflected at basal, interphalangeal joints; 8(R,L) expanded subdigital lamellae on fourth toe proximal to joint inflection, 11(R,L) unmodified subdigital lamellae distal to inflection, 19 total subdigital lamellae; and claws well-developed, base of claw sheathed by a dorsal and ventral scale.

Tail moderate in proportions, 86.0 mm in length, last 50.0 mm regenerated, 6.8 mm in width at base, tapering to a point; dorsal scales of tail flat; medial subcaudal scales twice as wide as long, not extending onto lateral surface of tail; 4(R,L) enlarged postcloacal

tubercles at base of tail on hemipenial swellings; and postcloacal scales flat.

*Coloration in life (Fig. 30):* Dorsal ground colour of head body, and limbs faintly magenta, that of anterior portion of tail dull-white; top of head and rostrum bearing a network of dark, diffuse mottling, no yellow reticulum; superciliary scales whitish; dark-brown, jagged, nuchal loop, unnotched anteromedially, deeply incised posteromedially; short, jagged incomplete band on nape; six jagged, dark, body bands not bearing lightened centres, wider than interspaces, not bearing paravertebral elements; one sacral band; interspaces bearing faint, dark markings, most extensive on flanks; irregularly shaped, faint bands on thighs; thighs and brachia darkly pigmented; ventrolateral body folds whitish; dark caudal bands not bearing lightened centres, wider than light caudal bands; light caudal bands with dark markings, not encircling tail; and ventral surfaces pigmented, dusky in appearance, more so beneath limbs and tail, less so in gular region.

*Variation (Fig. S10):* The paratypes closely approximate holotype in aspects of dorsal colour pattern. The dorsal band in the shoulder region in LSUHC 12786 is not bifurcated and it has a completely, nearly unicolour tan, regenerated tail. LSUHC 12785 is much darker overall. Meristic and mensural differences are presented in Table 17.

*Distribution:* *Cyrtodactylus welpyanensis* sp. nov. is known only from Wel Pyan Cave 35 km north of Hpa-an, Hpa-an District, Kayin State, Myanmar (Fig. 29).

*Etymology:* The specific epithet, *welpyanensis* (pronounced *way-pee-an-ensis*), is a noun in apposition in reference to the type locality of Wel Pyan Cave.

*Natural history:* Wel Pyan Cave is located along the west side of the Salween River and situated on the eastern flank of a small karst hill approximately 0.5 km wide, 1.3 km long and 256 m high that is surrounded by paddy fields. The opening of the cave is narrow (~10 × 10 m) and situated approximately 25 m above the base of the hill. The interior of the cave is complex and filled with blind caverns, stalactites and a maze of small, underground passageways through which water courses and through which a flatulent monk guided us (Fig. 31). We found three specimens of *C. welpyanensis* sp. nov. at approximately 1500 h 2–6 m up on clean, dry, smooth surfaces of the cave walls all within 10 m of each other and all within 50 m of the cave entrance where light still penetrated. Outside the cave, the base of the karst hill was jagged, deeply incised with

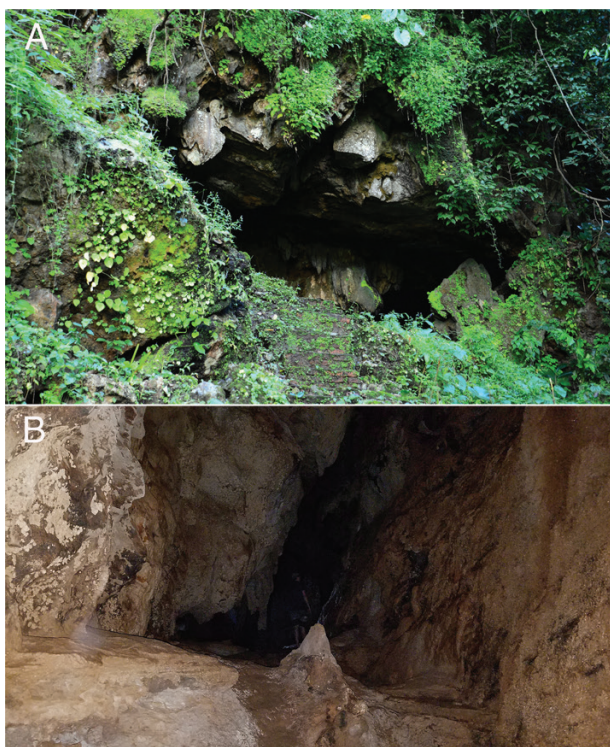

**Figure 31.** A, entrance to Welpyan Cave, Kayin State, Myanmar. B, microhabitat structure of the cave walls inside Welpyan Cave.

small, steep ravines and riddled with boulders that had broken away from the hillside. We do not believe that *C. welpyanensis* sp. nov. is restricted to the interior of the cave and if we had not been unexpectedly rushed away due to safety concerns, we believe many more specimens would have been found outside the cave after dark. The only other gekkonid seen was *H. frenatus*.

**Comparisons:** *Cyrtodactylus welpyanensis* sp. nov. is part of the *sinyineensis* group. The PCA and DAPC analyses indicate that the species of this group are completely separated in morphospace where the first two principal components account for 63% of the total variation (Fig. 12; Fig. S5) and load most heavily for numbers of infralabials, longitudinal rows of body tubercles, expanded subdigital lamellae on the fourth toe and post-precloacal scale rows (Table S3). *Cyrtodactylus welpyanensis* sp. nov. is well-differentiated from *C. aequalis*, *C. sinyineensis* sp. nov. and *C. dammathetensis* sp. nov. by having varying combinations of statistically different mean values of supralabial scales, infralabial scales, ventral scales, longitudinal rows of body tubercles, precloacal scales and body bands (Table 3). It differs further from the other species in the *sinyineensis* group in that the body tubercles do not extend past the base of the tail and from *C. aequalis* and *C. sinyineensis* sp. nov. in that the dark body bands are not edged with light tubercles (Table 8). Morphological and colour pattern differences from other species in the Indo-Chinese clade are listed in Table 8. Genetic distances among the species of this group range from 11.0 to 16.5% (Table 10).

#### The oldhami group

The monophyletic *oldhami* group is composed of *Cyrtodactylus* cf. *peguensis zebraicus*, a polyphyletic *C. oldhami*, *C. thirakhupti*, *C. payarhtanensis* and *C. lenya* from the Thai-Malay Peninsula just north of the Isthmus of Kra and *C. saiyok* from southwestern Thailand (Figs 2, 9). This group undoubtedly contains more Thai species but until researchers describing new species from this region realize that taking tissue samples in an age of integrative taxonomy is imperative, we will never know. The *oldhami* group is highly variable and defined by the following characters from Smith (1935), Taylor (1963), Pauwels *et al.* (2004), Grismer & Norhayati (2008), Panitvong *et al.* (2014) and in part by Connette *et al.* (2017): 9–13 supralabials; 9–12 infralabials; 14–20 longitudinal rows of body tubercles; 23–40 ventral scales; 7–20 subdigital lamellae; femoral pores absent; 0–8 precloacal pores in males; post-precloacal scales large; wide, transverse, medial, subcaudal scales; no anterior azygous notch in nuchal loop; no band on nape; 4–7 variably shaped body bands with lightened centres or dorsal pattern composed of light lines or

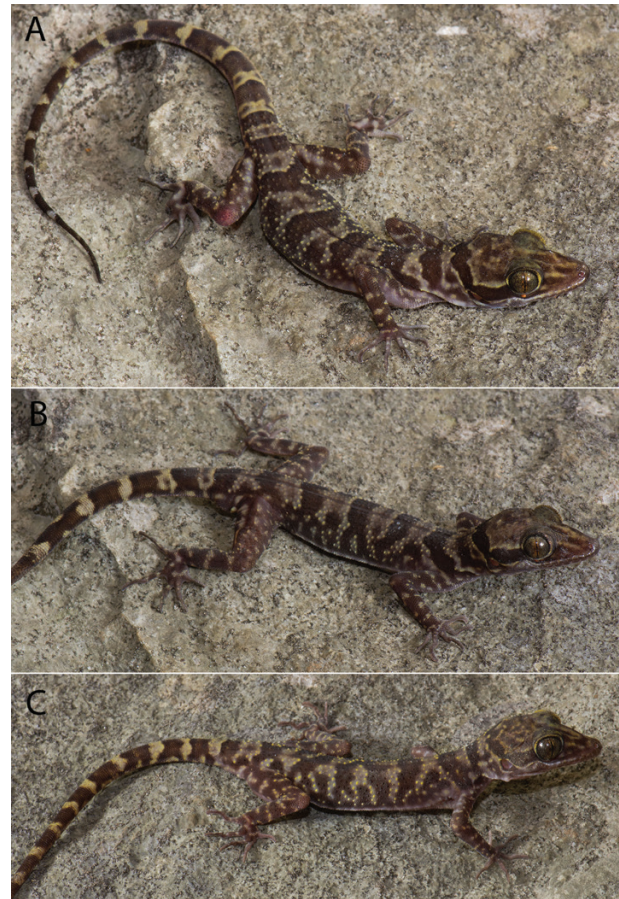

**Figure 32.** Type series of *Cyrtodactylus yathepyanensis* sp. nov. from the type locality of Yathe Pyan Cave, 9 km south-west of Hpa-an, Hpa-an District, Kayin State, Myanmar showing the range of variation in coloration and pattern. A, adult female paratype LSUHC 12821. B, adult male holotype LSUHC 12823. C, adult female paratype BYU 52229.

pairs of dark paravertebral blotches; anterodorsal margins of thighs and brachia and ventrolateral folds pigmented; and maximum SVL 61.0–83.0 mm. Connette *et al.* (2017) recovered *C. payarhtanensis* as the sister species of a genetic sample of *C. oldhami* from the pet trade that has no voucher or locality. We sequenced two voucher southern Thai specimens (MS 460, 585) from Ranong and Phang-nga Provinces, respectively, that form a monophyletic group but exclude the pet trade specimen, indicating *C. oldhami* may be polyphyletic. Our data further indicate that *C. thirakhupti* is the sister species of *C. oldhami* (MS 460, 585) and that *C. payarhtanensis* is sister to that group (Fig. 9).

#### The yathepyanensis group

The monophyletic *yathepyanensis* group is composed of *Cyrtodactylus yathepyanensis* sp. nov. and the sister



**Table 18.** Meristic, mensural and colour pattern data from the type series of *Cyrtodactylus yathepyanensis* sp. nov.

|                                                               | LSUHC<br>12823<br>holotype | LSUHC<br>12822<br>paratype | BYU<br>52228<br>paratype | BYU<br>52229<br>paratype | LSUHC<br>12821<br>paratype |
|---------------------------------------------------------------|----------------------------|----------------------------|--------------------------|--------------------------|----------------------------|
| Sex                                                           | M                          | F                          | F                        | F                        | F                          |
| Supralabials                                                  | 10                         | 10                         | 10                       | 9                        | 9                          |
| Infralabials                                                  | 9                          | 8                          | 9                        | 8                        | 8                          |
| Body tubercles low, weakly keeled                             | No                         | No                         | No                       | No                       | No                         |
| Body tubercles raised, moderately to strongly keeled          | Yes                        | Yes                        | Yes                      | Yes                      | Yes                        |
| Paravertebral tubercles                                       | 32                         | 31                         | 32                       | 31                       | 32                         |
| Longitudinal rows of body tubercles                           | 19                         | 18                         | 18                       | 19                       | 18                         |
| Tubercles extend beyond base of tail                          | Yes                        | Yes                        | Yes                      | Yes                      | Yes                        |
| Ventral scales                                                | 30                         | 32                         | 30                       | 30                       | 31                         |
| Expanded subdigital lamellae on fourth toe                    | 9                          | 9                          | 9                        | 9                        | 8                          |
| Unmodified subdigital lamellae on fourth toe                  | 14                         | 13                         | 14                       | 13                       | 12                         |
| Total subdigital lamellae on fourth toe                       | 23                         | 22                         | 23                       | 22                       | 20                         |
| Enlarged femoral scales (R/L)                                 | 16R17L                     | 15RL                       | 13R12L                   | 17R16L                   | 16R14L                     |
| Femoral pores (R/L)                                           | 9R8L                       | /                          | /                        | /                        | /                          |
| Enlarged preloacal scales                                     | 11                         | 13                         | 10                       | 10                       | 10                         |
| Precloacal pores                                              | 6                          | /                          | /                        | /                        | /                          |
| Post-precloacal scales rows                                   | 3                          | 3                          | 3                        | 3                        | 3                          |
| Enlarged femoral and precloacal scales continuous             | Yes                        | Yes                        | Yes                      | Yes                      | Yes                        |
| Pore-bearing femoral and precloacal scales continuous         | No                         | No                         | No                       | No                       | No                         |
| Enlarged proximal femoral scales ~1/2 size of distal femorals | Yes                        | Yes                        | Yes                      | Yes                      | Yes                        |
| Medial subcaudals two or three times wider than long          | 3                          | 3                          | 3                        | 3                        | 3                          |
| Medial subcaudals extend onto lateral subcaudal region        | Yes                        | Yes                        | Yes                      | Yes                      | Yes                        |
| Nuchal loop divided medially                                  | No                         | No                         | No                       | No                       | No                         |
| Nuchal loop with anterior azygous notch                       | No                         | No                         | No                       | No                       | No                         |
| Posterior border of nuchal loop                               | Sinuuous                   | Jagged                     | Jagged                   | Jagged                   | Sinuuous                   |
| Band on nape                                                  | No                         | Yes                        | No                       | Yes                      | Yes                        |
| Dorsal banding with paravertebral elements                    | No                         | No                         | No                       | No                       | No                         |
| Number of body bands                                          | 4                          | 6                          | 5                        | 5                        | 5                          |
| Dorsal bands wider than interspaces                           | Same                       | Same                       | Same                     | Same                     | Same                       |
| Dorsal bands bearing lightened centres                        | No                         | No                         | No                       | No                       | No                         |
| Dorsal bands edged with light tubercles                       | Yes                        | Yes                        | Yes                      | Yes                      | Yes                        |
| Dorsal band borders                                           | Smooth                     | Jagged                     | Jagged                   | Jagged                   | Smooth                     |
| Dark markings in dorsal interspaces                           | Yes                        | Yes                        | Yes                      | Yes                      | Yes                        |
| Ventrolateral body fold whitish                               | Yes                        | Yes                        | Yes                      | Yes                      | Yes                        |
| Top of head diffusely mottled, blotched or patternless        | Mottled                    | Mottled                    | Mottled                  | Mottled                  | Mottled                    |
| Light reticulum on top of head                                | No                         | No                         | No                       | No                       | No                         |
| Anterodorsal margin of thighs darkly pigment                  | Yes                        | Yes                        | Yes                      | Yes                      | Yes                        |
| Anterodorsal margin of brachia darkly pigment                 | Yes                        | Yes                        | Yes                      | Yes                      | Yes                        |
| Light caudal bands with dark markings                         | Yes                        | Yes                        | Yes                      | Yes                      | Yes                        |
| Light caudal bands encircle tail                              | No                         | No                         | No                       | No                       | No                         |
| Number of light caudal bands                                  | /                          | /                          | /                        | /                        | 13                         |
| Number of dark caudal bands                                   | /                          | /                          | /                        | /                        | 13                         |
| Dark caudal bands wider than light caudal bands               | Yes                        | Yes                        | Yes                      | Yes                      | Yes                        |
| Mature regenerated tail spotted                               | No                         | No                         | No                       | /                        | /                          |
| SVL                                                           | 68.0                       | 71.3                       | 71.3                     | 71.4                     | 72.7                       |
| TL                                                            | 71.0                       | 73.0                       | 73.0                     | 71.0                     | 75.0                       |
| TW                                                            | 8.1                        | 7.0                        | 6.4                      | 6.9                      | 6.9                        |

Table 18. Continued

|     | LSUHC<br>12823<br>holotype | LSUHC<br>12822<br>paratype | BYU<br>52228<br>paratype | BYU<br>52229<br>paratype | LSUHC<br>12821<br>paratype |
|-----|----------------------------|----------------------------|--------------------------|--------------------------|----------------------------|
| FL  | 11.6                       | 11.1                       | 10.2                     | 11.3                     | 12.0                       |
| TBL | 14.7                       | 13.4                       | 12.6                     | 13.1                     | 13.3                       |
| AG  | 28.0                       | 32.2                       | 31.7                     | 30.6                     | 32.3                       |
| HL  | 19.7                       | 21.4                       | 20.4                     | 21.9                     | 20.4                       |
| HW  | 14.1                       | 14.2                       | 13.2                     | 13.8                     | 14.2                       |
| HD  | 8.1                        | 8.4                        | 7.8                      | 8.6                      | 7.9                        |
| ED  | 5.0                        | 5.4                        | 4.9                      | 5.5                      | 5.2                        |
| EE  | 5.4                        | 5.7                        | 5.6                      | 6.0                      | 5.2                        |
| ES  | 9.1                        | 9.4                        | 9.2                      | 9.8                      | 9.3                        |
| EN  | 7.1                        | 7.2                        | 7.1                      | 6.6                      | 7.1                        |
| IO  | 6.6                        | 5.8                        | 5.6                      | 6.0                      | 6.1                        |
| EL  | 3.6                        | 3.2                        | 2.7                      | 3.0                      | 3.8                        |
| IN  | 2.4                        | 2.1                        | 2.4                      | 2.2                      | 2.2                        |

Abbreviations are listed in the Material and Methods. R, right; L, left; /, data unobtainable or not applicable.

species *C. linnoensis* sp. nov. and *C. sadanensis* sp. nov. from the lowland flood plain of the Salween River Basin of Kayin and Mon and states (Figs 9, 20). The *yathepyanensis* group is defined by the following range of characters: 9–11 supralabials; 7–9 infralabials; dorsal body tubercles raised, moderately to strongly keeled, extending beyond base of tail; 13–19 longitudinal rows of body tubercles; 26–33 paravertebral tubercles; 30–38 ventral scales; 21–24 subdigital lamellae; 12–37 enlarged femoral scales, proximal scales one-half to one-third the size of distal scales; 12–14 femoral pores in males; 9–13 enlarged preloacal scales; 2–6 preloacal pores in males; three or four post-preloacal scale rows; transverse caudal scales two or three times as wide as long, extending onto lateral surface of tail; top of head bearing dark, mottled pattern; no anterior, azygous notch in nuchal loop; band on nape; 4–6 regularly shaped body bands lacking or with only faint, lightened centres, edged with light tubercles; anterodorsal margins of thighs darkly pigment; ventrolateral folds not whitish; 13–16 light caudal bands not encircling tail; 13–17 dark caudal bands; and maximum SVL 72.3–78.0 mm (Table 8). The description and diagnosis of each species follows.

***CYRTODACTYLUS YATHEPYANENSIS* SP. NOV.**

YATHE PYAN CAVE BENT-TOED GECKO

(FIG. 32; TABLE 18)

*Holotype*: Adult male LSUHC 12823 collected on 4 October 2016 at 1800 h by Evan S. H. Quah, Matthew L. Murdoch, L. Lee Grismer, Marta S. Grismer, Myint Kyaw Thura, Perry L. Wood, Jr., Thaw Zin and Htet

Kyaw from Yathe Pyan Cave 9 km south-west of Hpa-an, Hpa-an District, Kayin State, Myanmar (N16°50.114, E97°34.243; 22 m in elevation).

*Paratypes*: Adult females BYU 52228–29 and LSUHC 12822 bear the same collection data as the holotype.

*Diagnosis*: *Cyrtodactylus yathepyanensis* sp. nov. differs from all congeners by having the unique combination of nine or ten supralabials; eight or nine infralabials; 18 or 19 longitudinal rows of body tubercles; 31 or 32 paravertebral tubercles; 30–32 ventral scales; relatively long digits with eight or nine expanded subdigital lamellae proximal to the digital inflection on the fourth toe, 12–14 unmodified, distal, subdigital lamellae, 20–23 total subdigital lamellae; raised, moderately to strongly keeled, dorsal body tubercles extending beyond base of tail; enlarged femoral and preloacal scales continuous; 25–34 enlarged femoral scales, proximal scales one-half to one-third the size of distal scales; 17 femoral pores in males; 10–13 enlarged preloacal scales; six preloacal pores in males; three rows of enlarged post-preloacal scales; medial subcaudal scales three times as wide as long extending onto lateral surface of tail; top of head bearing diffuse dark mottling, no yellow reticulum; nuchal loop not divided medially, lacking an anterior, azygous notch, posterior border sinuous to jagged; 4–6 dark, jagged, dorsal bands lacking paravertebral elements, same width as interspaces, lacking lightened centres, edged with light tubercles; dark markings and lacking light tubercles in dorsal interspaces; ventrolateral folds whitish; anterodorsal margins of

thighs and brachia darkly pigmented; 13 light caudal bands bearing dark markings, not encircling tail; 13 dark caudal bands wider than light caudal bands; and mature, regenerated tail not spotted.

*Description of holotype:* Adult male SVL 68.0 mm; head moderate in length (HL/SVL 0.29), wide (HW/HL 0.72), flat (HD/HL 0.41), distinct from neck, triangular in dorsal profile; lores inflated, prefrontal region concave, canthus rostralis rounded; snout elongate (ES/HL 0.46), rounded in dorsal profile, not flat in lateral profile; eye large (ED/HL 0.25); ear opening round, moderate in size (EL/HL 0.19); eye to ear distance greater than diameter of eye; rostral rectangular, partially divided dorsally by an inverted Y-shaped furrow, bordered posteriorly by left and right supranasals contacting on midline, laterally by first supralabials; external nares bordered anteriorly by rostral, dorsally by supranasal, posteriorly by three postnasals and ventrally by first supralabial; 10(R,L) square supralabials extending to below midpoint of eye; 9(R,L) infralabials tapering posteriorly to below orbit; scales of rostrum and lores slightly raised, larger than granular scales on top of head and occiput; scales on top of head and occiput intermixed with tubercles; dorsal superciliaries not elongate or keeled; mental triangular, bordered laterally by first infralabials and posteriorly by large left and right trapezoidal postmentals contacting for 60% of their length posterior to mental; one row of slightly enlarged, chinshields bordering all infralabials; and gular and throat scales small, flat, grading posteriorly into larger, subimbricate, pectoral and ventral scales.

Body relatively short (AG/SVL 0.41) with well-defined ventrolateral folds; dorsal scales small, raised and interspersed with large, conical, semi-regularly arranged, moderately to strongly keeled tubercles extending from nape to beyond base of tail; tubercles on nape smaller than those on posterior portion of body, less sharply keeled; approximately 19 longitudinal rows of body tubercles; 32 paravertebral tubercles; 30 flat, subimbricate, ventral scales larger than dorsal scales; 11 enlarged precloacal scales; six precloacal pores; three rows of large, post-precloacal scales; and no deep, precloacal groove or depression.

Forelimbs moderate in stature, relatively short (FL/SVL 0.17); slightly raised scales of forearm larger than those on body, interspersed with small tubercles; palmar scales flat; digits well-developed, relatively long, inflected at basal, interphalangeal joints; digits much more narrow distal to inflections; widened, proximal, subdigital lamellae do not extend onto palm; claws well-developed, sheathed by a dorsal and ventral scale at base; hindlimbs more robust than forelimbs, moderate in length (TBL/SVL 0.22), covered dorsally by granular

scales intermixed with large tubercles and bearing flat, slightly larger scales anteriorly; ventral scales of thigh flat, imbricate, larger than dorsal scales, one row of 16(R)17(L) enlarged, femoral scales in contact with enlarged precloacal scales; proximal femoral scales one-half to one-third the size of distal femoral scales; 9(R)8(L) femoral pores; subtibial scales flat, imbricate; small, postfemoral scales form abrupt union with larger, flat, ventral scales of posteroventral margin of thigh; plantar scales raised; digits relatively long, well-developed, inflected at basal, interphalangeal joints; 9(R,L) transversely expanded subdigital lamellae on fourth toe proximal to joint inflection not extending onto sole, 14(R,L) unmodified subdigital lamellae distal to inflection, 23 total subdigital lamellae; and claws well-developed, base of claw sheathed by a dorsal and ventral scale.

Tail moderate in proportions, 71.0 mm in length, last 35.0 mm regenerated, 8.1 mm in width at base, tapering to a point; dorsal scales of tail flat; medial subcaudal scales three times as wide as long extending onto lateral surface of tail; 2(R,L) enlarged, postcloacal tubercles at base of tail on hemipenial swellings; and postcloacal scales flat.

*Coloration in life (Fig. 32):* Dorsal ground colour of head body, and limbs tan, that of anterior portion of tail dull-yellow; top of head bearing, medial, diffuse dark mottling, no yellow reticulum; rostrum bearing diffuse, dark, lineate markings; superciliary scales tan; distinct, dark-brown nuchal loop, notched posteromedially not anteromedially, and bearing a sinuous posterior margin; no band on nape; four regularly shaped body bands not bearing light centres, same width as interspaces, lacking paravertebral elements; one sacral band; interspaces bearing dark markings, especially on flanks; banding on limbs indistinct, mottled with yellowish markings; anterodorsal margins of thighs and brachia pigmented; ventrolateral body folds whitish; dark caudal bands lacking lightened centres, wider than light caudal bands; light caudal bands bearing dark markings, not encircling tail; ventral surfaces pigmented, dusky in appearance; and subcaudal region gray with light mottling.

*Variation (Fig. 32; Fig. S11):* The female paratypes generally approximate the holotype in aspects of colour pattern. LSUHC 12819 is somewhat darker overall and BYU 52228–29 and LSUHC 12822 have weakly pigmented, ventrolateral body folds. The nape band is present in BYU 52229 and LSUHC 12821–22. BYU 52228 and LSUHC 128221 have original tails. Meristic and mensural differences are presented in [Table 18](#).

*Distribution:* *Cyrtodactylus yathepyanensis* sp. nov. is known only from Yathe Pyan Cave 9 km south-west

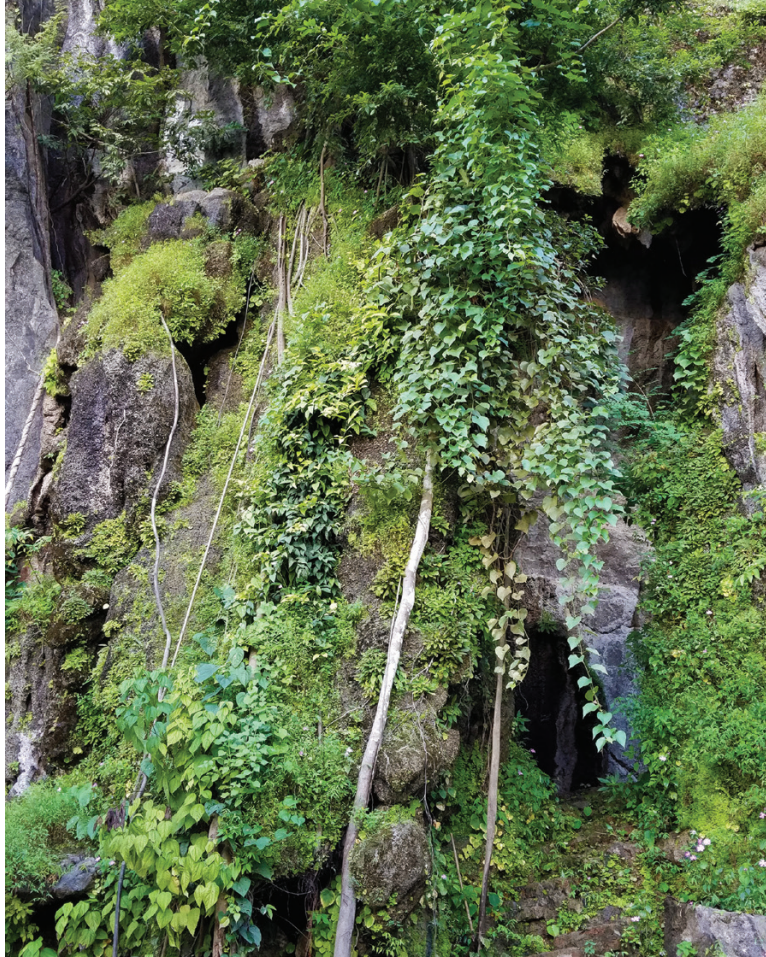

**Figure 33.** Microhabitat structure of the limestone hillside outside Yathe Pyan Cave, Kayin State, Myanmar.

of Hpa-an, Hpa-an District, Kayin State, Myanmar (Fig. 20).

*Etymology:* The specific epithet, *yathepyanensis* (pronounced *ya-thay-pee-an-ensis*), is a noun in apposition in reference to the type locality of Yathe Pyan Cave.

*Natural history:* Yathe Pyan Cave is located at the south end of a karst hill approximately 1.2 km wide, 3.7 km long and 241 m high that is surrounded by paddy fields and situated just west of the Salween River. The opening of the cave is very wide and high (~45 m by ~20 m) and the cave is filled with religious structures. It extends for nearly 0.5 km and opens up again on the western side of the hill. No *C. yathepyanensis* sp. nov. were seen inside the cave during the afternoon at 1600 h but two were observed deep within cracks outside the cave at the base of the karst hill. This portion of the hill has several

boulders, cracks and holes that serve as retreats (Fig. 33). During the evening, only one specimen was observed at the entrance of the cave although they were quite common outside the cave. One hatchling was observed. Lizards were extremely wary and difficult to catch and when observed, all were in close proximity to retreat sites. This was quite different from other species (i.e. *C. sadanensis* sp. nov., *C. pharbaungensis* sp. nov., *C. sanpelensis* sp. nov. and *C. linnoensis* sp. nov.) we had collected in similar habitats on the hillsides outside of caves and we suspect the presence of numerous *Gecko gecko*, which could easily be a potential predator, could have been the reason. Other gekkonids observed were *Gehyra mutilata* and *H. frenatus*.

*Comparisons:* *Cyrtodactylus yathepyanensis* sp. nov. is part of the *yathepyanensis* group. The PCA and DAPC analyses indicate that the species of this group are completely separate in morphospace and that the first two principal components account for 54% of the

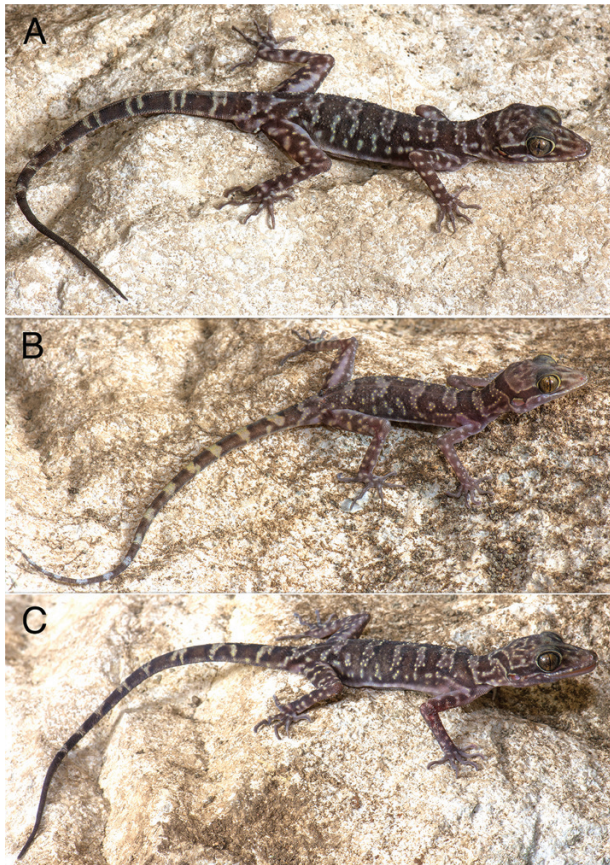

**Figure 34.** Type specimens of *Cyrtodactylus linnoensis* sp. nov. from the Linno Cave region, 5 km south-west of Hpa-an, Hpa-an District, Kayin State, Myanmar showing the range of variation in coloration and pattern. A, adult male holotype (LSUHC 12826). B, juvenile male paratype (BYU 52233). C, adult female paratype (LSUHC 12824).

total variation (Fig. 12; Fig. S5) and load most heavily for numbers of paravertebral tubercles and ventral scales (Table S4). *Cyrtodactylus yathepyanensis* sp. nov. is well-differentiated from *C. linnoensis* sp. nov. and *C. sadanensis* sp. nov. by having varying combinations of statistically different mean values of supralabial and infralabial scales, paravertebral tubercles, unmodified and total fourth toe lamellae, ventral scales, enlarged femoral scales, and longitudinal rows of body tubercles and preloacal pores (Table 4). It differs further from *C. sadanensis* sp. nov. and some *C. linnoensis* sp. nov. in having continuous vs. discontinuous enlarged femoral and preloacal scales and pigmented vs. unpigmented thighs and brachia, and from *C. sadanensis* sp. nov. in having a smaller maximum SVL (72.8 mm vs. 78.0 mm; Table 8). Morphological and colour pattern differences from other species in the Indo-Chinese clade are listed in Table 8. Genetic distances among

the species of this group range from 11.0 to 12.7% (Table 10).

***CYRTODACTYLUS LINNOENSIS* SP. NOV.**

LINNO CAVE BENT-TOED GECKO

(FIG. 34; TABLE 19)

*Holotype:* Adult male LSUHC 12826 collected on 4 October 2016 at 2000 h by L. Lee Grismer, Perry L. Wood, Jr., Evan S. H. Quah, Matthew L. Murdoch, Marta S. Grismer, Myint Kyaw Thura, Thaw Zin and Htet Kyaw from the Linno Cave region 5 km south-west of Hpa-an, Hpa-an District, Kayin State, Myanmar (N16°50.551, E97°36.402; 25 m in elevation).

*Paratypes:* Adult males BYU 52230–31, 52323, LSUHC 12829, 12832–34, juvenile male BYU 52223 and adult females LSUHC 12824–25 bear the same collection data as the holotype.

*Diagnosis:* *Cyrtodactylus linnoensis* sp. nov. differs from all congeners by having the unique combination of nine or ten supralabials; seven or eight infralabials; 13–15 rows of longitudinal body tubercles; 26 or 27 paravertebral tubercles; 35–38 ventral scales; relatively long digits with nine or ten expanded subdigital lamellae proximal to the digital inflection on the fourth toe, 13 or 14 unmodified, distal, subdigital lamellae, 22–24 total subdigital lamellae; raised, moderately to strongly keeled, dorsal, body tubercles extending beyond base of tail; 12–37 enlarged femoral scales, proximal scales one-half to one-third the size of distal scales; 12–14 femoral pores in males; 9–13 enlarged preloacal scales; 4–6 preloacal pores in males; three or four rows of enlarged post-preloacal scales; medial subcaudal scales three times as wide as long, extending onto lateral surface of tail; top of head bearing diffuse, dark mottling, no yellow reticulum; nuchal loop lacking an anterior, azygous notch, posterior border usually sinuous; five or six dark, jagged, dorsal bands lacking paravertebral elements, wider than interspaces, faintly lightened centres, edged with light-coloured tubercles; band on nape; dark markings but no light-coloured tubercles in dorsal interspaces; ventrolateral folds whitish; anterodorsal margins of thighs lack pigment; brachia at least faintly pigmented; 15 light-coloured caudal bands bearing dark markings, not encircling tail; 14 dark caudal bands wider than light caudal bands; and mature, regenerated tail not spotted.

*Description of holotype:* Adult male SVL 74.9 mm; head moderate in length (HL/SVL 0.29), wide (HW/HL

**Table 19.** Meristic, mensural and colour pattern data from the type series of *Cyrtodactylus linnoensis* sp. nov.

|                                                       | LSUHC<br>12826 | LSUHC<br>12824 | LSUHC<br>12825 | BYU<br>52230 | BYU<br>52231 | LSUHC<br>12829 | BYU<br>52232 | BYU<br>52233 | LSUHC<br>12832 | LSUHC<br>12833 | LSUHC<br>12834 |
|-------------------------------------------------------|----------------|----------------|----------------|--------------|--------------|----------------|--------------|--------------|----------------|----------------|----------------|
| Sex                                                   | M              | F              | F              | M            | M            | M              | M            | M            | M              | M              | M              |
| Supralabials                                          | 9              | 9              | 10             | 10           | 9            | 9              | 9            | 10           | 9              | 10             | 10             |
| Infralabials                                          | 8              | 7              | 8              | 7            | 7            | 7              | 8            | 7            | 7              | 7              | 7              |
| Body tubercles low, weakly keeled                     | No             | No             | No             | No           | No           | No             | No           | No           | No             | No             | No             |
| Body tubercles raised, moderately to strongly keeled  | Yes            | Yes            | Yes            | Yes          | Yes          | Yes            | Yes          | Yes          | Yes            | Yes            | Yes            |
| Paravertebral tubercles                               | 26             | 27             | 26             | 26           | 27           | 26             | 26           | 26           | 26             | 27             | 26             |
| Longitudinal rows of body tubercles                   | 13             | 13             | 13             | 13           | 14           | 15             | 13           | 13           | 14             | 13             | 15             |
| Tubercles extend beyond base of tail                  | Yes            | Yes            | Yes            | Yes          | Yes          | Yes            | Yes          | Yes          | Yes            | Yes            | Yes            |
| Ventral scales                                        | 38             | 36             | 36             | 37           | 38           | 36             | 38           | 35           | 37             | 37             | 38             |
| Expanded subdigital lamellae on fourth toe            | 9              | 10             | 9              | 9            | 9            | 9              | 9            | 9            | 9              | 10             | 10             |
| Unmodified subdigital lamellae on fourth toe          | 14             | 14             | 14             | 14           | 14           | 14             | 14           | 13           | 14             | 14             | 14             |
| Total subdigital lamellae on fourth toe               | 23             | 24             | 23             | 23           | 23           | 23             | 23           | 22           | 23             | 24             | 24             |
| Enlarged femoral scales (R/L)                         | 17RL           | 9RL            | 8RL            | 7R11L        | 10R12L       | 6RL            | 8R7L         | 12R10L       | 16R17L         | 19R18L         | 20R17L         |
| Femoral pores (R/L)                                   | 6R6L           | /              | /              | 5R7L         | 6R7L         | 6R6L           | 6R7L         | /            | 8R8L           | 7R7L           | 8RL            |
| Enlarged precolacal scales                            | 13             | 12             | 10             | 12           | 12           | 10             | 10           | 12           | 13             | 9              | 13             |
| Precloacal pores                                      | 5              | /              | /              | 4            | 4            | 5              | 5            | 5            | 5              | 4              | 6              |
| Post-precloacal scales rows                           | 3              | 3              | 3              | 3            | 3            | 4              | 3            | 3            | 3              | 3              | 4              |
| Enlarged femoral and precloacal scales continuous     | Yes            | No             | No             | No           | No           | No             | No           | No           | Yes            | Yes            | Yes            |
| Pore-bearing femoral and precloacal scales continuous | No             | No             | No             | No           | No           | No             | No           | No           | No             | No             | No             |

**Table 19.** *Continued*

|                                                        | LSUHC<br>12826<br>holotype | LSUHC<br>12824<br>paratype | LSUHC<br>12825<br>paratype | BYU<br>52230<br>paratype | BYU<br>52231<br>paratype | LSUHC<br>12829<br>paratype | BYU<br>52232<br>paratype | BYU<br>52233<br>paratype | LSUHC<br>12832<br>paratype | LSUHC<br>12833<br>paratype | LSUHC<br>12834<br>paratype |
|--------------------------------------------------------|----------------------------|----------------------------|----------------------------|--------------------------|--------------------------|----------------------------|--------------------------|--------------------------|----------------------------|----------------------------|----------------------------|
| Enlarged proximal femoral scales                       | Yes                        | Yes                        | Yes                        | Yes                      | Yes                      | Yes                        | Yes                      | Yes                      | Yes                        | Yes                        | Yes                        |
| ~1/2 size of distal femorals                           | 3                          | 3                          | 3                          | 3                        | 3                        | 3                          | 3                        | 3                        | 3                          | 3                          | 3                          |
| Medial subcaudals two or three times wider than long   | Yes                        | Yes                        | Yes                        | Yes                      | Yes                      | Yes                        | Yes                      | Yes                      | Yes                        | Yes                        | Yes                        |
| Medial subcaudals extend onto lateral subcaudal region | No                         | Yes                        | No                         | No                       | No                       | Yes                        | No                       | No                       | Yes                        | No                         | No                         |
| Nuchal loop divided medially                           | No                         | No                         | No                         | No                       | No                       | No                         | No                       | No                       | No                         | No                         | No                         |
| Nuchal loop with anterior azygous notch                | Sinuuous                   | Sinuuous                   | Jagged                     | Sinuuous                 | Sinuuous                 | Sinuuous                   | Sinuuous                 | Sinuuous                 | Sinuuous                   | Sinuuous                   | Sinuuous                   |
| Posterior border of nuchal loop                        | Yes                        | Yes                        | Yes                        | Yes                      | Yes                      | Yes                        | Yes                      | Yes                      | Yes                        | Yes                        | Yes                        |
| Band on nape                                           | No                         | No                         | No                         | No                       | No                       | No                         | No                       | No                       | No                         | No                         | No                         |
| Dorsal banding with paravertebral elements             | 5                          | 6                          | 5                          | 5                        | 5                        | 5                          | 5                        | 5                        | 5                          | 5                          | 5                          |
| Number of body bands                                   | Yes                        | Yes                        | Yes                        | Yes                      | Yes                      | Yes                        | Yes                      | Yes                      | Yes                        | Yes                        | Yes                        |
| Dorsal bands wider than interspaces                    | Faint                      | Faint                      | Faint                      | Faint                    | Faint                    | Faint                      | Faint                    | Faint                    | Faint                      | Faint                      | Faint                      |
| Dorsal bands bearing lightened centres                 | Yes                        | Yes                        | Yes                        | Yes                      | Yes                      | Yes                        | Yes                      | Yes                      | Yes                        | Yes                        | Yes                        |
| Dorsal bands edged with light tubercles                | Jagged                     | Jagged                     | Jagged                     | Jagged                   | Jagged                   | Jagged                     | Jagged                   | Jagged                   | Jagged                     | Jagged                     | Jagged                     |
| Dorsal band borders                                    | Yes                        | Yes                        | Yes                        | Yes                      | Yes                      | Yes                        | Yes                      | Yes                      | Yes                        | Yes                        | Yes                        |
| Dark markings in dorsal interspaces                    | Yes                        | Yes                        | Yes                        | Yes                      | Yes                      | Yes                        | Yes                      | Yes                      | Yes                        | Yes                        | Yes                        |
| Ventrolateral body fold whitish                        | Mottled                    | Mottled                    | Mottled                    | Mottled                  | Mottled                  | Mottled                    | Mottled                  | Mottled                  | Mottled                    | Mottled                    | Mottled                    |
| Top of head diffusely mottled, blotched or patternless |                            |                            |                            |                          |                          |                            |                          |                          |                            |                            |                            |

**Table 19.** *Continued*

|                                                 | LSUHC<br>12826<br>holotype | LSUHC<br>12824<br>paratype | LSUHC<br>12825<br>paratype | BYU<br>52230<br>paratype | BYU<br>52231<br>paratype | LSUHC<br>12829<br>paratype | BYU<br>52232<br>paratype | BYU<br>52233<br>paratype | LSUHC<br>12832<br>paratype | LSUHC<br>12833<br>paratype | LSUHC<br>12834<br>paratype |
|-------------------------------------------------|----------------------------|----------------------------|----------------------------|--------------------------|--------------------------|----------------------------|--------------------------|--------------------------|----------------------------|----------------------------|----------------------------|
| Light reticulum on top of head                  | No                         | No                         | No                         | No                       | No                       | No                         | No                       | No                       | No                         | No                         | No                         |
| Anterodorsal margin of thighs darkly pigmented  | No                         | No                         | No                         | No                       | No                       | No                         | No                       | No                       | No                         | No                         | No                         |
| Anterodorsal margin of brachia darkly pigmented | Faint                      | Faint                      | Yes                        | Yes                      | Yes                      | Faint                      | Faint                    | Faint                    | Faint                      | Faint                      | Faint                      |
| Light caudal bands with dark markings           | Yes                        | Yes                        | Yes                        | Yes                      | Yes                      | Yes                        | Yes                      | Yes                      | Yes                        | Yes                        | Yes                        |
| Light caudal bands encircle tail                | No                         | No                         | No                         | No                       | No                       | No                         | No                       | No                       | No                         | No                         | No                         |
| Number of light caudal bands                    | /                          | /                          | /                          | /                        | /                        | /                          | /                        | 15                       | /                          | /                          | /                          |
| Number of dark caudal bands                     | /                          | /                          | /                          | /                        | /                        | /                          | /                        | 14                       | /                          | /                          | /                          |
| Dark caudal bands wider than light caudal bands | Yes                        | Yes                        | Yes                        | Yes                      | Yes                      | Yes                        | Yes                      | Yes                      | Yes                        | Yes                        | Yes                        |
| Mature regenerated tail spotted                 | No                         | No                         | No                         | No                       | No                       | No                         | No                       | No                       | No                         | No                         | No                         |
| SVL                                             | 74.9                       | 76.0                       | 77.5                       | 73.4                     | 74.8                     | 75.8                       | 76.1                     | 55.7                     | 76.9                       | 78.0                       | 76.6                       |
| TL                                              | 79.0                       | 116.0r                     | 96.0r                      | 92.0r                    | 89.0r                    | 109.0r                     | 45.0b                    | 87                       | 99.0r                      | 99.0r                      | 105.0r                     |
| TW                                              | 7.6                        | 6.5                        | 7.0                        | 7.6                      | 8.6                      | 8.1                        | 8.8                      | 4.6                      | 8.4                        | 8.2                        | 8.5                        |
| FL                                              | 13.2                       | 14.5                       | 12.6                       | 13.5                     | 13.6                     | 14.3                       | 14.9                     | 9.5                      | 13.8                       | 13.1                       | 14.2                       |
| TBL                                             | 16.3                       | 15.4                       | 17.4                       | 15.0                     | 16.7                     | 15.3                       | 16.4                     | 12.3                     | 17.1                       | 16.0                       | 16.7                       |
| AG                                              | 34.5                       | 33.7                       | 34.5                       | 31.4                     | 32.3                     | 32.7                       | 34.3                     | 23.2                     | 32.5                       | 31.7                       | 32.7                       |
| HL                                              | 21.7                       | 21.6                       | 22.4                       | 21.9                     | 22.8                     | 21.5                       | 21.3                     | 15.8                     | 20.8                       | 21.2                       | 22.0                       |
| HW                                              | 13.5                       | 13.5                       | 14.1                       | 13.0                     | 13.9                     | 14.3                       | 14.1                     | 9.7                      | 14.6                       | 14.6                       | 14.0                       |
| HD                                              | 8.8                        | 8.0                        | 9.2                        | 8.0                      | 9.3                      | 8.9                        | 8.0                      | 6.0                      | 8.4                        | 8.7                        | 9.0                        |
| ED                                              | 5.0                        | 5.6                        | 6.4                        | 4.9                      | 5.8                      | 6.1                        | 5.4                      | 4.5                      | 5.8                        | 5.9                        | 5.8                        |
| EE                                              | 5.7                        | 5.2                        | 5.0                        | 5.4                      | 5.3                      | 5.8                        | 5.3                      | 3.9                      | 5.3                        | 5.7                        | 5.4                        |
| ES                                              | 10.2                       | 9.5                        | 10.3                       | 9.3                      | 10.0                     | 9.3                        | 9.7                      | 6.8                      | 9.7                        | 9.7                        | 9.7                        |
| EN                                              | 8.0                        | 7.9                        | 7.4                        | 7.8                      | 7.9                      | 7.7                        | 7.2                      | 5.4                      | 7.5                        | 7.5                        | 7.6                        |



Table 19. *Continued*

|    | LSUHC<br>12826<br>holotype | LSUHC<br>12824<br>paratype | LSUHC<br>12825<br>paratype | BYU<br>52230<br>paratype | BYU<br>52231<br>paratype | LSUHC<br>12829<br>paratype | BYU<br>52232<br>paratype | BYU<br>52233<br>paratype | LSUHC<br>12832<br>paratype | LSUHC<br>12833<br>paratype | LSUHC<br>12834<br>paratype |
|----|----------------------------|----------------------------|----------------------------|--------------------------|--------------------------|----------------------------|--------------------------|--------------------------|----------------------------|----------------------------|----------------------------|
| IO | 6.6                        | 6.5                        | 6.6                        | 6.4                      | 6.6                      | 6.3                        | 6.4                      | 4.4                      | 6.9                        | 5.9                        | 6.7                        |
| EL | 2.9                        | 3.7                        | 3.1                        | 3.1                      | 3.1                      | 3.0                        | 2.9                      | 2.5                      | 2.7                        | 3.0                        | 2.9                        |
| IN | 2.5                        | 2.0                        | 2.5                        | 2.2                      | 2.3                      | 2.2                        | 2.2                      | 1.9                      | 2.3                        | 2.1                        | 2.3                        |

Abbreviations are listed in Material and Methods. R, right; L, left; /, data unobtainable or not applicable; r, regenerated; b, broken.

0.62), flat (HD/HL 0.41), distinct from neck, triangular in dorsal profile; lores inflated, prefrontal region concave, canthus rostralis rounded; snout elongate (ES/HL 0.47), rounded in dorsal profile, moderately flat in lateral profile; eye large (ED/HL 0.23); ear opening round, moderate in size (EL/HL 0.13); eye to ear distance greater than diameter of eye; rostral rectangular, partially divided dorsally by inverted Y-shaped furrow, bordered posteriorly by left and right supranasals contacting on midline and minute azygous scale, laterally by first supralabials; external nares bordered anteriorly by rostral, dorsally by supranasal, posteriorly by two postnasals, ventrally by first supralabial; 9(R,L) square supralabials extending to below midpoint of eye; 8(R,L) infralabials tapering posteriorly to below orbit; scales of rostrum and lores slightly raised, larger than granular scales on top of head and occiput; scales on top of head and occiput intermixed with small tubercles laterally; dorsal superciliaries not elongate or keeled; mental triangular, bordered laterally by first infralabials and posteriorly by large left and right trapezoidal postmentals contacting for 70% of their length posterior to mental; one row of slightly enlarged chinshields bordering all infralabials; and gular and throat scales small, flat, grading posteriorly into larger, subimbricate, pectoral and ventral scales.

Body relatively short (AG/SVL 0.46) with well-defined ventrolateral folds; dorsal scales small, raised and interspersed with large, conical, semi-regularly arranged, moderately to strongly keeled tubercles extending from nape to beyond base of tail; tubercles on nape smaller than those on posterior portion of body, less sharply keeled; approximately 13 longitudinal rows of body tubercles; 26 paravertebral tubercles; 38 flat, subimbricate, ventral scales larger than dorsal scales; 13 enlarged precloacal scales; five precloacal pores; three rows of large, post-precloacal scales; no deep, precloacal groove or depression.

Forelimbs moderate in stature, relatively short (FL/SVL 0.18); slightly raised scales of forearm larger than those on body, lacking tubercles; palmar scales low, rounded; digits well-developed, relatively long, inflected at basal, interphalangeal joints; digits much more narrow distal to inflections; widened, proximal, subdigital lamellae do not extend onto palm; claws well-developed, sheathed by a dorsal and ventral scale at base; hindlimbs more robust than forelimbs, moderate in length (TBL/SVL 0.22), covered dorsally by raised scales intermixed with large tubercles and bearing flat, slightly larger scales anteriorly; ventral scales of thigh flat, imbricate, larger than dorsal scales, one row 17(R,L) of enlarged femoral scales in contact with enlarged precloacal scales, proximal femoral scales one-half to one-third the size of distal femoral scales; 6(R,L) femoral

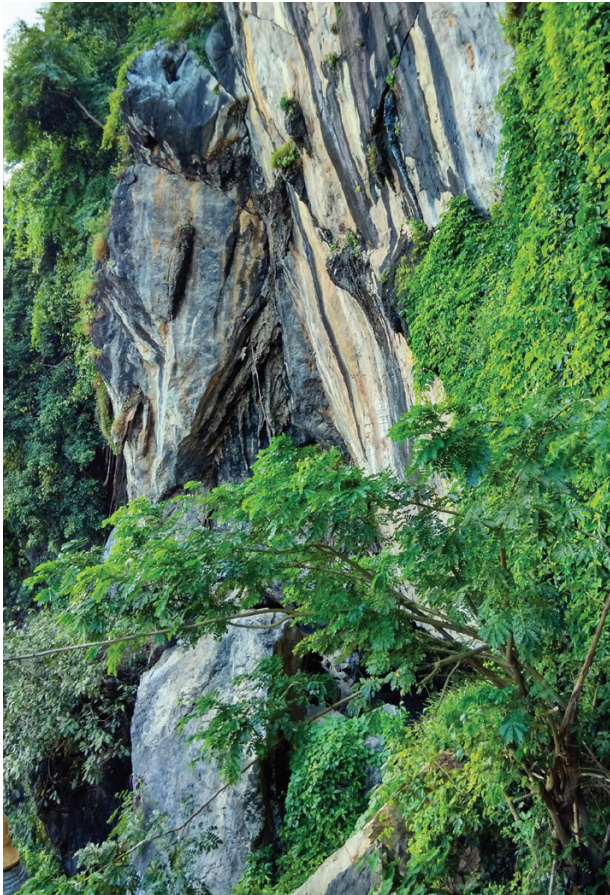

**Figure 35.** Microhabitat structure of the limestone hillside outside of Linno Cave, Kayin State, Myanmar.

pores; small, postfemoral scales form an abrupt union with larger, flat ventral scales of posteroventral margin of thigh; subtibial scales flat, imbricate; plantar scales raised; digits relatively long, well-developed, inflected at basal, interphalangeal joints; 9(R,L) transversely expanded subdigital lamellae on fourth toe proximal to joint inflection that do not extend onto sole, 14(R,L) unmodified subdigital lamellae distal to inflection, 23 total subdigital lamellae; and claws well-developed, base of claw sheathed by a dorsal and ventral scale.

Tail original, moderate in proportions, 79.0 mm in length, 7.6 mm in width at base, tapering to a point; dorsal scales of tail flat; medial subcaudal scales three times as wide as long, extending onto lateral surface of tail; 2(R,L) enlarged, postcloacal tubercles at base of tail on hemipenial swellings; and postcloacal scales flat.

**Coloration in life:** Dorsal ground colour of head body, and limbs grey, that of anterior portion of tail very dull-yellow; top of head bearing, diffuse, dark mottlings, yellow reticulum absent; rostrum

bearing diffuse, dark, lineate markings; superciliary scales yellowish; dark-brown, nuchal loop bearing a sinuous posterior border connects with dark, nape band laterally; five jagged, body bands wider than interspaces, bearing faintly lightened centres, lacking paravertebral elements, edged with light tubercles; one nape band; one chevron-shaped postsacral band; interspaces bearing large dark markings, especially on flanks; line of yellowish spots on lower flanks; banding on limbs indistinct, mottled with yellowish markings; anterodorsal margins of thighs unpigmented; anterodorsal margins of brachia faintly to heavily pigmented; ventrolateral folds whitish; dark caudal bands not bearing lightened centres, wider than light caudal bands; light caudal bands bearing dark markings, not encircling tail; ventral surfaces pigmented, dusky in appearance; and subcaudal region dark with lighter mottling.

**Variation (Fig. S12):** The paratypes reasonably approximate the holotype in aspects of colour pattern. The nuchal loop is divided in BYU 52230, LSUHC 12824, 12829 and 12832. In LSUHC 12825, the dorsal bands are so wide and dark, they are difficult to discern. Although BYU 52233 is a juvenile, its colour pattern is not notably more contrasted or different from the range of variation observed in the adults, indicating that an ontogenetic change is absent. Meristic and mensural differences are presented in [Table 19](#).

**Distribution:** *Cyrtodactylus linnoensis* sp. nov. is known only from the Linno Cave region 5 km southwest of Hpa-an, Hpa-an District, Kayin State, Myanmar ([Fig. 20](#)).

**Etymology:** The specific epithet, *linnoensis*, is a noun in apposition in reference to the type locality.

**Natural history:** The Linno Cave region is situated at the north-east end of a small karst hill approximately 340 m wide, 430 m long and 57 m high located on the west bank of Salween River. It is actually the north-west section of a much larger karst hill that has been bisected by the Salween River. The collecting area is a vertical karst wall approximately 250 m in length and 20 m tall that parallels the river and leads to the Linno Cave at its north-eastern terminus ([Fig. 35](#)). The habitat along the wall has several deep cracks, holes, side chambers and deep incisions that serve as refuge sites for geckos during the day. Additionally, the wall is sheltered by vegetation. The last 50 m of the wall near the cave lack vegetation and here we saw only *Hemidactylus brookii* and *Gekko gecko* both day and night. At night, *Cyrtodactylus linnoensis* sp. nov. were abundant and occurred along the entire wall

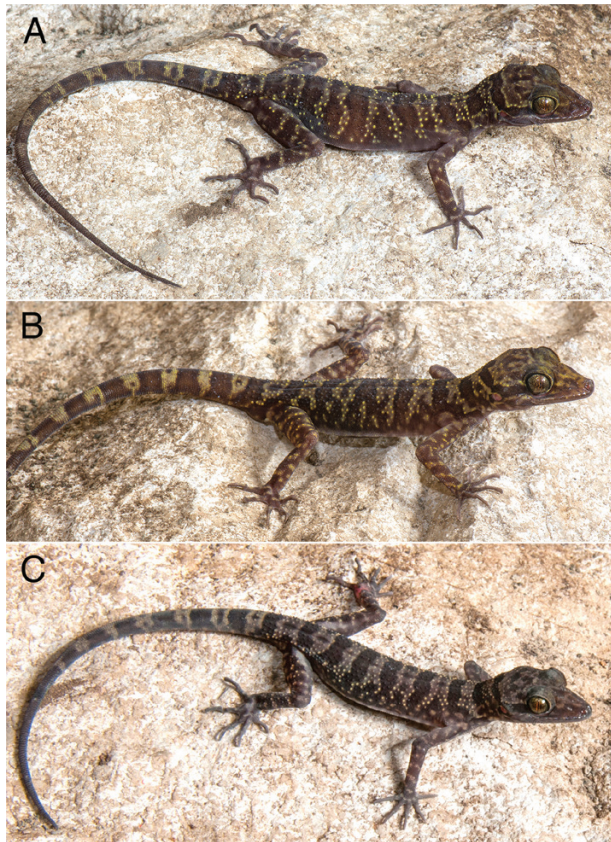

**Figure 36.** Paratypes of *Cyrtodactylus sadanensis* sp. nov. from the type locality of Sadan Cave, 17 km south-east of Hpa-an, Hpa-an District, Kayin State, Myanmar showing the range of variation in coloration and pattern. A, adult female paratype (LSUHC 12849). B, adult male holotype (LSUHC 12839). C, subadult female paratype (BYU 52219).

except where the vegetation was lacking and where *H. brookii* was abundant. We found no geckos inside Linno Cave. We believe the abundance of bats, rats, cockroaches and a near-toxic atmosphere made the cave uninhabitable for *Cyrtodactylus*. Much of the cave surfaces were covered with a dark gelatinous ooze through which geckos would likely be unable to locomote.

**Comparisons:** *Cyrtodactylus linnoensis* is part of the *yathepyanensis* group. The PCA and DAPC analyses indicate that the species of this group are completely separate in morphospace and that the first two principal components account for 54% of the total variation (Fig. 12; Fig. S5) and load most heavily for numbers of paravertebral tubercles and ventral scales (Table S4). *Cyrtodactylus linnoensis* sp. nov. is well-differentiated from *C. yathepyanensis* sp. nov. and *C. sadanensis* sp. nov. by having varying combinations

of statistically different mean values of supralabial and infralabial scales, paravertebral tubercles, expanded, unmodified and total fourth toe lamellae, ventral scales, enlarged femoral scales, longitudinal rows of body tubercles and preloacal pores (Table 8). It differs further from *C. sadanensis* sp. nov. in having a larger maximum SVL (78.0 mm vs. 73.8 mm). Morphological differences from other species in the Indo-Chinese clade are listed in Table 8. Genetic distances among the species of this group range from 11.0 to 12.7% (Table 10).

***CYRTODACTYLUS SADANENSIS* SP. NOV.**

SADAN CAVE BENT-TOED GECKO

(FIG. 36; TABLE 20)

**Holotype:** Adult male LSUHC 12839 collected on 5 October 2016 at 1700 h by L. Lee Grismer, Evan S. H. Quah, Perry L. Wood, Jr., Myint Kyaw Thura, Thaw Zin, Matthew L. Murdoch, Marta S. Grismer and Htet Kyaw from the Sadan Cave 17 km south-east of Hpa-an, Hpa-an District, Kayin State, Myanmar (N16°44.605, E97°29.493; 26 m in elevation).

**Paratypes:** Adult males BYU 52218 and LSUHC 12848, adult females BYU 52216–17, 52219, LSUHC 12841–47, 12849 and 12853 bear the same collection data as the holotype.

**Diagnosis:** *Cyrtodactylus sadanensis* sp. nov. differs from all congeners by having the unique combination of ten or 11 supralabials; 7–9 infralabials; 13–15 longitudinal rows of body tubercles; 30–33 paravertebral tubercles; 30–35 ventral scales; relatively long digits with 7–9 expanded, subdigital lamellae on fourth toe proximal to digital inflection, 13 or 14 unmodified, distal, subdigital lamellae and 21–23 total subdigital lamellae; raised, moderately to strongly keeled, dorsal body tubercles extending beyond base of tail; enlarged femoral and preloacal scales not continuous; 34–41 enlarged femoral scales; 12 or 13 femoral pores in males; 10–13 enlarged preloacal scales; two or three preloacal pores in males; three rows of enlarged post-preloacal scales; medial subcaudal scales three times as wide as long, extending onto lateral surface of tail; top of head bearing diffuse, dark mottling, lacking yellow reticulum; nuchal loop not divided medially, lacking an anterior azygous notch; five rarely six dark, weakly jagged, dorsal bands generally lacking paravertebral elements, same width or narrower than interspaces, faintly lightened centres, edged with yellowish tubercles; dark markings in dorsal interspaces; ventrolateral folds whitish; anterodorsal margins of thighs generally lack pigment; 16 light caudal bands bearing dark markings, not encircling tail;

**Table 20.** Meristic, mensural and colour pattern data from the type series of *Cyrtodactylus sadanensis* sp. nov.

|                                                               | LSUHC<br>12839 | BYU<br>52218  | LSUHC<br>12848 | LSUHC<br>12853 | BYU<br>52219  | LSUHC<br>12843 | LSUHC<br>12846 | LSUHC<br>12842 |
|---------------------------------------------------------------|----------------|---------------|----------------|----------------|---------------|----------------|----------------|----------------|
|                                                               | holotype       | paratype      | paratype       | paratype       | paratype      | paratype       | paratype       | paratype       |
| Sex                                                           | M              | M             | M              | F              | F             | F              | F              | F              |
| Supralabials                                                  | 11             | 11            | 10             | 10             | 10            | 11             | 10             | 10             |
| Infralabials                                                  | 9              | 8             | 8              | 7              | 8             | 7              | 8              | 8              |
| Body tubercles low, weakly keeled                             | No             | No            | No             | No             | No            | No             | No             | No             |
| Body tubercles raised, moderately to strongly keeled          | Yes            | Yes           | Yes            | Yes            | Yes           | Yes            | Yes            | Yes            |
| Paravertebral tubercles                                       | 32             | 30            | 32             | 30             | 31            | 31             | 30             | 32             |
| Longitudinal rows of body tubercles                           | 14             | 14            | 14             | 13             | 15            | 15             | 14             | 14             |
| Tubercles extend beyond base of tail                          | Yes            | Yes           | Yes            | Yes            | Yes           | Yes            | Yes            | Yes            |
| Ventral scales                                                | 31             | 31            | 35             | 32             | 32            | 32             | 35             | 30             |
| Expanded subdigital lamellae on fourth toe                    | 7              | 7             | 8              | 8              | 8             | 9              | 9              | 9              |
| Unmodified subdigital lamellae on fourth toe                  | 14             | 14            | 13             | 14             | 14            | 14             | 14             | 13             |
| Total subdigital lamellae on fourth toe                       | 21             | 21            | 21             | 22             | 22            | 23             | 23             | 22             |
| Enlarged femoral scales (R/L)                                 | 19RL           | 21R20L        | 17R22L         | 17R19L         | 22R17L        | 22R21L         | 20R19L         | 17RL           |
| Femoral pores (R/L)                                           | 6R7L           | 6R6L          | 6R6L           | /              | /             | /              | /              | /              |
| Enlarged precolacal scales                                    | 10             | 12            | 11             | 12             | 12            | 12             | 12             | 13             |
| Precolacal pores                                              | 3              | 2             | 2              | /              | /             | /              | /              | /              |
| Post-precolacal scales rows                                   | 3              | 3             | 3              | 3              | 3             | 3              | 3              | 3              |
| Enlarged femoral and precolacal scales continuous             | No             | No            | No             | No             | No            | No             | No             | No             |
| Pore-bearing femoral and precolacal scales continuous         | No             | No            | No             | No             | No            | No             | No             | No             |
| Enlarged proximal femoral scales ~1/2 size of distal femorals | Yes            | Yes           | Yes            | Yes            | Yes           | Yes            | Yes            | Yes            |
| Medial subcaudals two or three times wider than long          | 3              | 3             | 3              | 3              | 3             | 3              | 3              | 3              |
| Medial subcaudals extend onto lateral surface of tail         | Yes            | Yes           | Yes            | Yes            | Yes           | Yes            | Yes            | Yes            |
| Nuchal loop divided medially                                  | No             | No            | No             | No             | No            | No             | No             | No             |
| Nuchal loop with anterior azygous notch                       | No             | No            | No             | No             | No            | No             | No             | No             |
| Posterior border of nuchal loop                               | Sinuuous       | Straight      | Straight       | Sinuuous       | Straight      | Sinuuous       | Sinuuous       | Straight       |
| Band on nape                                                  | Yes            | Yes           | Yes            | Yes            | Yes           | Yes            | Yes            | Yes            |
| Dorsal banding with paravertebral elements                    | No             | No            | No             | No             | No            | No             | No             | No             |
| Number of body bands                                          | 5              | 5             | 5              | 5              | 6             | 5              | 5              | 5              |
| Dorsal bands wider than interspaces                           | No             | Same          | No             | Same           | Same          | Same           | Same           | Same           |
| Dorsal bands bearing lightened centres                        | Faint          | Faint         | Faint          | Faint          | Faint         | Faint          | Faint          | Faint          |
| Dorsal bands edged with light tubercles                       | Partly         | Partly        | Partly         | Partly         | Partly        | Partly         | Partly         | Partly         |
| Dorsal band borders                                           | Weakly jagged  | Weakly jagged | Weakly jagged  | Weakly jagged  | Weakly jagged | Weakly jagged  | Weakly jagged  | Weakly jagged  |
| Dark markings in dorsal interspaces                           | Yes            | Yes           | Yes            | Yes            | Yes           | Yes            | Yes            | Yes            |
| Ventrolateral body fold whitish                               | Faint          | Faint         | Faint          | Faint          | Faint         | Faint          | Faint          | Faint          |

**Table 20.** *Continued*

|                                                        | Mottled  | Mottled  | Mottled  | Mottled  | Mottled  | Mottled  | Mottled  | Mottled  | Mottled  | Mottled  | Mottled  | Mottled  |
|--------------------------------------------------------|----------|----------|----------|----------|----------|----------|----------|----------|----------|----------|----------|----------|
| Top of head diffusely mottled, blotched or patternless | No       | No       | No       | No       | No       | No       | No       | No       | No       | No       | No       | No       |
| Light reticulum on top of head                         | No       | No       | No       | No       | No       | No       | No       | No       | No       | No       | No       | No       |
| Anterodorsal margin of thighs pigmented                | No       | No       | No       | No       | No       | No       | No       | No       | No       | No       | No       | No       |
| Anterodorsal margin of brachia pigmented               | No       | No       | No       | No       | No       | No       | No       | No       | No       | No       | No       | No       |
| Light caudal bands with dark markings                  | Yes      | Yes      | Yes      | Yes      | Yes      | Yes      | Yes      | Yes      | Yes      | Yes      | Yes      | Yes      |
| Light caudal bands encircle tail                       | No       | No       | No       | No       | No       | No       | No       | No       | No       | No       | No       | No       |
| Number of light caudal bands                           | /        | /        | /        | /        | /        | /        | /        | /        | /        | /        | /        | /        |
| Number of dark caudal bands                            | /        | /        | /        | /        | /        | /        | /        | /        | /        | /        | /        | /        |
| Dark caudal bands wider than light caudal bands        | Yes      | Same     | Yes      | Same     | Yes      | Same     | Yes      | Same     | Yes      | Same     | Yes      | Same     |
| Mature regenerated tail spotted                        | No       | No       | No       | No       | No       | No       | No       | No       | No       | No       | No       | No       |
| SVL                                                    | 73.8     | 69.3     | 71.7     | 68.8     | 61.7     | 58.5     | 64.0     | 58.5     | 64.3     | 58.5     | 64.3     | 64.3     |
| TL                                                     | 112.0r   | 43.0     | 111.0r   | 104.0    | 83.0     | 73.0r    | 90.0r    | 73.0r    | 95.0     | 73.0r    | 95.0     | 95.0     |
| TW                                                     | 8.7      | 6.2      | 7.5      | 6.5      | 6.1      | 5.9      | 6.0      | 5.9      | 6.8      | 5.9      | 6.8      | 6.8      |
| FL                                                     | 13.0     | 11.9     | 12.1     | 12.4     | 11.3     | 9.9      | 11.3     | 9.9      | 10.4     | 9.9      | 10.4     | 10.4     |
| TBL                                                    | 16.2     | 14.0     | 14.1     | 13.8     | 13.4     | 12.1     | 13.8     | 12.1     | 13.5     | 12.1     | 13.5     | 13.5     |
| AG                                                     | 29.9     | 28.0     | 31.0     | 31.0     | 29.0     | 26.2     | 26.3     | 26.2     | 29.8     | 26.2     | 29.8     | 29.8     |
| HL                                                     | 21.5     | 19.1     | 19.7     | 17.8     | 16.7     | 17.0     | 19.6     | 17.0     | 18.0     | 17.0     | 18.0     | 18.0     |
| HW                                                     | 14.8     | 12.5     | 13.7     | 12.9     | 11.2     | 10.8     | 12.2     | 10.8     | 11.7     | 10.8     | 11.7     | 11.7     |
| HD                                                     | 7.9      | 7.0      | 8.0      | 7.5      | 7.6      | 7.2      | 7.2      | 7.2      | 7.6      | 7.2      | 7.6      | 7.6      |
| ED                                                     | 5.6      | 4.5      | 5.1      | 4.4      | 4.3      | 4.4      | 4.7      | 4.4      | 4.4      | 4.4      | 4.4      | 4.4      |
| EE                                                     | 5.4      | 4.8      | 5.1      | 4.3      | 4.3      | 3.8      | 4.9      | 3.8      | 4.7      | 3.8      | 4.7      | 4.7      |
| ES                                                     | 8.6      | 8.5      | 9.1      | 8.2      | 7.7      | 7.5      | 8.5      | 7.5      | 7.8      | 7.5      | 7.8      | 7.8      |
| EN                                                     | 7.4      | 6.2      | 6.7      | 6.7      | 6.1      | 5.7      | 6.9      | 5.7      | 5.9      | 5.7      | 5.9      | 5.9      |
| IO                                                     | 5.4      | 4.3      | 6.1      | 4.9      | 4.5      | 4.3      | 5.3      | 4.3      | 4.9      | 4.3      | 4.9      | 4.9      |
| EL                                                     | 3.4      | 2.7      | 2.8      | 3.0      | 2.7      | 3.2      | 2.2      | 3.2      | 2.5      | 3.2      | 2.5      | 2.5      |
| IN                                                     | 2.3      | 2.0      | 2.1      | 2.3      | 1.9      | 1.7      | 1.9      | 1.7      | 1.8      | 1.7      | 1.8      | 1.8      |
| Sex                                                    | LSUHC    | LSUHC    | LSUHC    | LSUHC    | BYU      | BYU      | LSUHC    | BYU      | LSUHC    | BYU      | LSUHC    | LSUHC    |
| Supralabials                                           | 12847    | 12844    | 12844    | 12849    | 52217    | 52216    | 12841    | 52216    | 12845    | 52216    | 12845    | 12845    |
| Infralabials                                           | paratype | paratype | paratype | paratype | paratype | paratype | paratype | paratype | paratype | paratype | paratype | paratype |
| Body tubercles low, weakly keeled                      | F        | F        | F        | F        | F        | F        | F        | F        | F        | F        | F        | F        |
| Body tubercles raised, moderately to strongly keeled   | 10       | 10       | 10       | 10       | 10       | 11       | 11       | 11       | 11       | 11       | 11       | 11       |
|                                                        | 8        | 8        | 8        | 9        | 8        | 8        | 8        | 8        | 8        | 8        | 8        | 8        |
|                                                        | No       | No       | No       | No       | No       | No       | No       | No       | No       | No       | No       | No       |
|                                                        | Yes      | Yes      | Yes      | Yes      | Yes      | Yes      | Yes      | Yes      | Yes      | Yes      | Yes      | Yes      |

Table 20. Continued

|                                                               | LSUHC<br>12847 | LSUHC<br>12844 | LSUHC<br>12849 | BYU<br>52217  | LSUHC<br>12841 | BYU<br>52216  | LSUHC<br>12845 |
|---------------------------------------------------------------|----------------|----------------|----------------|---------------|----------------|---------------|----------------|
|                                                               | paratype       | paratype       | paratype       | paratype      | paratype       | paratype      | paratype       |
| Paravertebral tubercles                                       | 32             | 33             | 30             | 33            | 32             | 31            | 33             |
| Longitudinal rows of body tubercles                           | 13             | 14             | 15             | 15            | 15             | 14            | 15             |
| Tubercles extend beyond base of tail                          | Yes            | Yes            | Yes            | Yes           | Yes            | Yes           | Yes            |
| Ventral scales                                                | 32             | 35             | 31             | 32            | 32             | 30            | 30             |
| Expanded subdigital lamellae on fourth toe                    | 9              | 9              | 9              | 9             | 9              | 8             | 9              |
| Unmodified subdigital lamellae on fourth toe                  | 14             | 14             | 13             | 14            | 13             | 14            | 13             |
| Total subdigital lamellae on fourth toe                       | 23             | 23             | 22             | 23            | 22             | 22            | 22             |
| Enlarged femoral scales (R/L)                                 | 16R18L         | 19R20L         | 19R17L         | 18RL          | 18R21L         | 20R19L        | 17R22L         |
| Femoral pores (R/L)                                           | /              | /              | /              | /             | /              | /             | /              |
| Enlarged precolocal scales                                    | 12             | 13             | 12             | 12            | 12             | 13            | 11             |
| Precloacal pores                                              | /              | /              | /              | /             | /              | /             | /              |
| Post-precloacal scales rows                                   | 3              | 3              | 3              | 3             | 3              | 3             | 3              |
| Enlarged femoral and precloacal scales continuous             | No             | No             | No             | No            | No             | No            | No             |
| Pore-bearing femoral and precloacal scales continuous         | No             | No             | No             | No            | No             | No            | No             |
| Enlarged proximal femoral scales ~1/2 size of distal femorals | Yes            | Yes            | Yes            | Yes           | Yes            | Yes           | Yes            |
| Medial subcaudals two or three times wider than long          | 3              | 3              | 3              | 3             | 3              | 3             | 3              |
| Medial subcaudals extend onto lateral surface of tail         | Yes            | Yes            | Yes            | Yes           | Yes            | Yes           | Yes            |
| Nuchal loop divided medially                                  | No             | No             | No             | No            | No             | No            | No             |
| Nuchal loop with anterior azygous notch                       | No             | No             | No             | No            | No             | No            | No             |
| Posterior border of nuchal loop                               | Sinuuous       | Straight       | Sinuuous       | Sinuuous      | Sinuuous       | Sinuuous      | Sinuuous       |
| Band on nape                                                  | Yes            | Yes            | Yes            | Yes           | Yes            | Yes           | Yes            |
| Dorsal banding with paravertebral elements                    | No             | No             | No             | No            | No             | No            | No             |
| Number of body bands                                          | 5              | 5              | 5              | 5             | 5              | 5             | 5              |
| Dorsal bands wider than interspaces                           | Same           | Same           | Same           | Same          | Same           | No            | Same           |
| Dorsal bands bearing lightened centres                        | Faint          | Faint          | Faint          | Faint         | Faint          | Faint         | Faint          |
| Dorsal bands edged with light tubercles                       | Partly         | Partly         | Partly         | Partly        | Partly         | Yes           | Yes            |
| Shape of dorsal bands                                         | Weakly jagged  | Weakly jagged  | Weakly jagged  | Weakly jagged | Weakly jagged  | Weakly jagged | Weakly jagged  |
| Dark markings in dorsal interspaces                           | Yes            | Yes            | Yes            | Yes           | Yes            | Yes           | Yes            |
| Ventrrolateral body fold whitish                              | Faint          | Faint          | Faint          | Faint         | Faint          | Faint         | Faint          |
| Top of head diffusely mottled, blotched or patternless        | Mottled        | Mottled        | Mottled        | Mottled       | Mottled        | Mottled       | Mottled        |
| Light reticulum on top of head                                | No             | No             | No             | No            | No             | No            | No             |
| Anterodorsal margin of thighs pigmented                       | No             | Faint          | Faint          | No            | Faint          | Faint         | No             |
| Anterodorsal margin of brachia pigmented                      | Yes            | Faint          | Faint          | Faint         | Yes            | No            | No             |
| Light caudal bands with dark markings                         | Yes            | Yes            | Yes            | Yes           | Yes            | Yes           | Yes            |

**Table 20.** *Continued*

|                                                 | LSUHC<br>12847<br>paratype | LSUHC<br>12844<br>paratype | LSUHC<br>12849<br>paratype | BYU<br>52217<br>paratype | LSUHC<br>12841<br>paratype | BYU<br>52216<br>paratype | LSUHC<br>12845<br>paratype |
|-------------------------------------------------|----------------------------|----------------------------|----------------------------|--------------------------|----------------------------|--------------------------|----------------------------|
| Light caudal bands encircle tail                | No                         | No                         | No                         | No                       | No                         | No                       | No                         |
| Number of light caudal bands                    | /                          | /                          | /                          | /                        | /                          | /                        | /                          |
| Number of dark caudal bands                     | /                          | /                          | /                          | /                        | /                          | /                        | /                          |
| Dark caudal bands wider than light caudal bands | Yes                        | /                          | Same                       | Same                     | Yes                        | /                        | Same                       |
| Mature regenerated tail spotted                 | No                         | No                         | No                         | No                       | No                         | No                       | No                         |
| SVL                                             | 59.2                       | 59.5                       | 73.7                       | 67.6                     | 63.1                       | 70.9                     | 69.0                       |
| TL                                              | 84.0                       | /                          | 110.0                      | 22.0b                    | 66.0r                      | 85.0                     | 113r                       |
| TW                                              | 5.5                        | 6.1                        | 7.5                        | 5.3                      | 6.2                        | 7.6                      | 6.7                        |
| FL                                              | 9.9                        | 9.7                        | 13.1                       | 11.1                     | 11.1                       | 12.3                     | 11.4                       |
| TBL                                             | 12.1                       | 11.8                       | 15.9                       | 14.0                     | 13.3                       | 15.6                     | 13.6                       |
| AG                                              | 26.3                       | 25.7                       | 32.4                       | 30.2                     | 27.6                       | 30.5                     | 30.5                       |
| HL                                              | 18.0                       | 15.7                       | 21.7                       | 19.3                     | 18.3                       | 19.7                     | 19.6                       |
| HW                                              | 10.9                       | 11.1                       | 13.8                       | 12.2                     | 12.2                       | 13.8                     | 13.3                       |
| HD                                              | 6.5                        | 7.1                        | 8.2                        | 8.0                      | 7.2                        | 8.1                      | 7.6                        |
| ED                                              | 4.1                        | 4.2                        | 5.2                        | 5.0                      | 4.7                        | 4.9                      | 5.3                        |
| EE                                              | 4.3                        | 4.0                        | 5.5                        | 4.9                      | 4.9                        | 4.5                      | 4.7                        |
| IN                                              | 2.0                        | 1.8                        | 2.3                        | 1.9                      | 2.1                        | 2.1                      | 2.0                        |

Abbreviations are listed in the Material and Methods. R, right; L, left; /, data unobtainable or not applicable; r, regenerated; b, broken.

17 dark caudal bands same width or wider than light caudal bands; and mature, regenerated tail not spotted.

*Description of holotype:* Adult male SVL 73.8 mm; head moderate in length (HL/SVL 0.29), wide (HW/HL 0.69), flat (HD/HL 0.37), distinct from neck, triangular in dorsal profile; lores inflated, prefrontal region concave, canthus rostralis rounded; snout elongate (ES/HL 0.40), rounded in dorsal profile, not flattened in lateral profile; eye large (ED/HL 0.26); ear opening pare-shaped, moderate in size (EL/HL 0.16); eye to ear distance greater than diameter of eye; rostral rectangular, partially divided dorsally by inverted Y-shaped furrow, bordered posteriorly by left and right supranasals and small azygous scale, laterally by first supralabials; supranasal separated by two small, azygous scales; external nares bordered anteriorly by rostral, dorsally by supranasal, posteriorly by two postnasals, ventrally by first supralabial; 11(R,L) square supralabials extending to below midpoint of eye; 9(R)8(L) infralabials tapering posteriorly to below orbit; scales of rostrum and lores slightly raised, larger than granular scales on top of head and occiput; scales on top of head and occiput intermixed with small tubercles; dorsal superciliaries not elongate or keeled; mental triangular, bordered laterally by first infralabials and posteriorly by large, left and right trapezoidal postmentals contacting for 50% of their length posterior to mental; one row of slightly enlarged chinshields bordering all infralabials; and gular and throat scales small, flat, grading posteriorly into larger, subimbricate pectoral and ventral scales.

Body relatively short (AG/SVL 0.41) with well-defined ventrolateral folds; dorsal scales small, raised and interspersed with large, conical, semi-regularly arranged, moderately to strongly keeled tubercles; tubercles extend from nape to beyond base of tail; tubercles on nape smaller than those on posterior portion of body, less sharply keeled; approximately 14 longitudinal rows of body tubercles; 32 paravertebral tubercles; 31 flat, subimbricate, ventral scales larger than dorsal scales; ten enlarged precloacal scales; three precloacal pores; three rows of large, post-precloacal scales; and no deep, precloacal groove or depression.

Forelimbs moderate in stature, relatively short (FL/SVL 0.18); slightly raised, subimbricate scales of forearm larger than those on body, lacking tubercles; palmar scales low, rounded; digits well-developed, relatively long, inflected at basal, interphalangeal joints; digits much more narrow distal to inflections; widened, proximal, subdigital lamellae do not extend onto palm; claws well-developed, sheathed by a dorsal and ventral scale at base; hindlimbs more robust than forelimbs, moderate in length (TBL/SVL 0.22), covered dorsally by raised scales intermixed with larger tubercles and bearing flat, slightly larger scales anteriorly; ventral

scales of thigh flat, imbricate, larger than dorsal scales, one row of 19(R,L) enlarged femoral scales in contact with enlarged precloacal scales, proximal femoral scales one-half to one-third distal femoral scales; 6(R)7(L) femoral pores; small postfemoral scales form abrupt union with larger, flat ventral scales of posteroventral margin of thigh; subtibial scales flat, imbricate; plantar scales raised; digits relatively long, well-developed, inflected at basal, interphalangeal joints; 7(R,L) transversely expanded subdigital lamellae on fourth toe proximal to joint inflection not extending onto sole, 14(R,L) unmodified subdigital lamellae distal to inflection, 21 total subdigital lamellae; distal one-half of digit 1 of left hand missing; and claws well-developed, base of claw sheathed by a dorsal and ventral scale.

Tail moderate in proportions, 112.0 mm in length, last 40.0 mm regenerated, 8.7 mm in width at base, tapering to a point; dorsal scales of tail flat; medial subcaudal scales three times as wide as long, extending onto lateral surface of tail; 2(R,L) enlarged postcloacal tubercles at base of tail on hemipenial swellings; and postcloacal scales flat.

*Coloration in life:* Dorsal ground colour of head body, limbs and yellowish tan; top of head bearing, diffuse, irregularly shaped, dark mottling, yellow reticulum absent; rostrum bearing diffuse, dark, speckling; superciliary scales yellowish; dark, nuchal loop bearing a sinuous posterior margin; five weakly jagged, body bands narrower than interspaces, bearing faintly lightened centres, lacking paravertebral elements, partly edged with light tubercles, posterior two bands broken and irregularly shaped; one sacral band; interspaces bearing large, dark, diffuse, medial spots; dark markings on flanks; dark banding on limbs indistinct, mottled with yellowish markings; anterodorsal margins of thighs and brachia not pigmented; ventrolateral folds faintly whitish; dark caudal bands bearing slightly lightened centres, wider than light caudal bands; light caudal bands bearing dark markings, not encircling tail; venter beige, generally unpigmented; and subcaudal region darker.

*Variation (Fig. 36; Fig. S13):* The paratypes closely approximate the holotype in aspects of colour pattern. LSUHC 12851 has six instead of five body bands. BYU 52217, LSUHC 12844 and 12948 have broken tails and LSUHC 12846 is missing its right arm. The nape band on BYU 52218, LSUHC 12845 and 12847 is divided medially. Meristic and mensural differences are presented in Table 20.

*Distribution:* *Cyrtodactylus sadanensis* sp. nov. is known only from the Sadan Cave 17 km south-east of Hpa-an, Hpa-an District, Kayin State, Myanmar (Fig. 20).



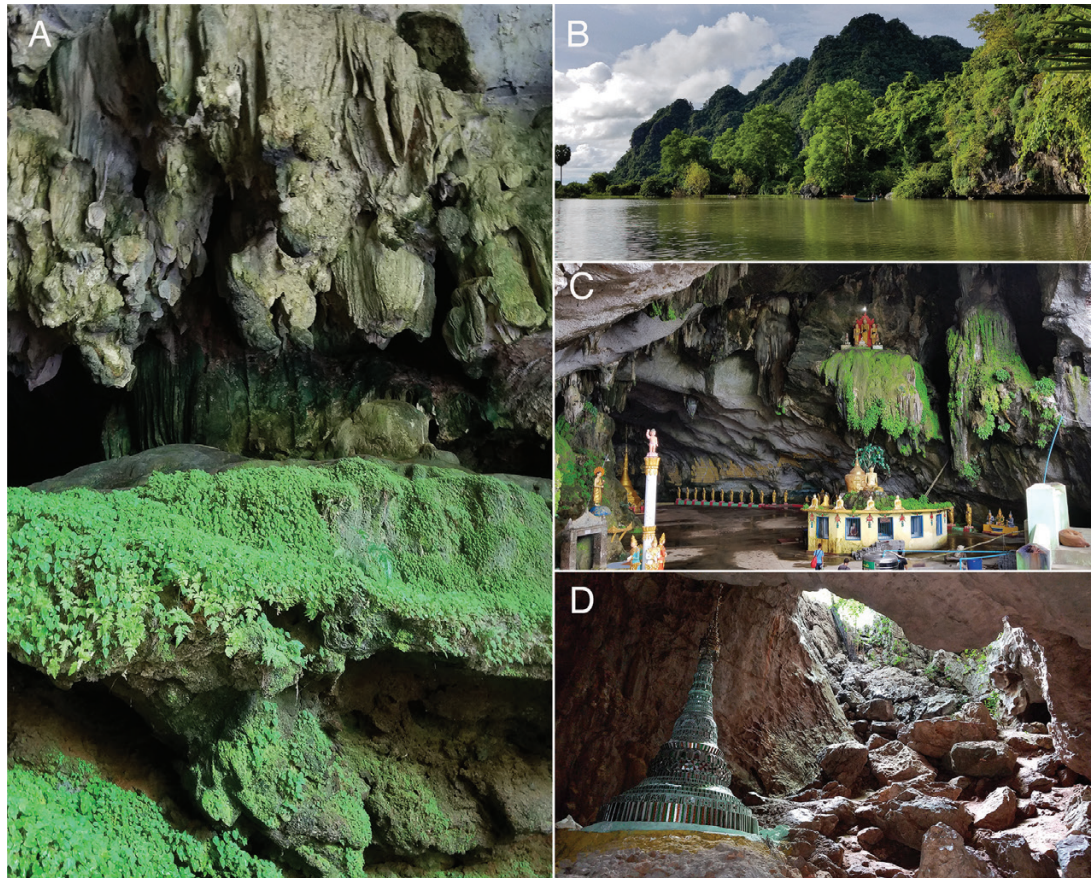

**Figure 37.** A, microstructure of the limestone at the entrance of Sadan Cave, Kayin State, Myanmar. B, limestone hillside in which Sadan Cave and Sin Yine Cave are located. C, cave entrance of Sadan Cave. D, opening in the top of Sadan Cave.

*Etymology:* The specific epithet, *sadanensis*, is a noun in apposition in reference to the type locality of Sadan Cave.

*Natural history:* Sadan Cave is located immediately south-east of Hpa-an and situated on the south end of a large, isolated, karst hill approximately 3.6 km wide, 16.4 km long and 338 m high that is surrounded by paddy fields. Sadan Cave is connected to Sin Yine Cave as they occur along the same, semicircular, karst ridge. The mouth of Sadan Cave is approximately 700 m from the opening of Sin Yine Cave across an ephemerally flooded paddy field. The interior of Sadan Cave is wide, airy and high-roofed and approximately 0.25 km in length from the southern entrance to the northern exit. Most of the interior of the cave is smooth-walled and there is not an abundance of the appropriate microhabitat structure necessary for *Cyrtodactylus* similar to what we had observed in other caves. Outside the cave along the base of the karst hill, has an abundance of cracks, holes, and broken boulders and associated rubble that had been shed from the hillside (Fig. 37). *Cyrtodactylus* were common and ubiquitous in

this habitat after dark and absent only from the nearby vegetation. Only one lizard was seen in the cave.

*Comparisons:* *Cyrtodactylus sadanensis* sp. nov. is part of the *yathepyanensis* group. The PCA and DAPC analyses indicate that the species of this group are completely separate in morphospace and that the first two principal components account for 55% of the total variation (Fig. 12; Fig. S5) and load most heavily for numbers of paravertebral tubercles and ventral scales (Table 8). See Comparisons for *C. yathepyanensis* sp. nov. and *C. linnoensis* sp. nov. for additional differences among them. Morphological differences from other species in the Indo-Chinese clade are listed in Table 8.

*Remarks:* The fact that *Cyrtodactylus sadanensis* sp. nov. is sympatric but not syntopic with *C. sinyineensis* from Sin Yine Cave is an indication of the degree of niche partitioning that may occur in many of the karst habitats we explored. The hillside walls outside Sadan Cave are continuous with those of Sin Yine Cave and would enable these two species to share the same microhabitat. Yet the larger *C. sinyineensis*

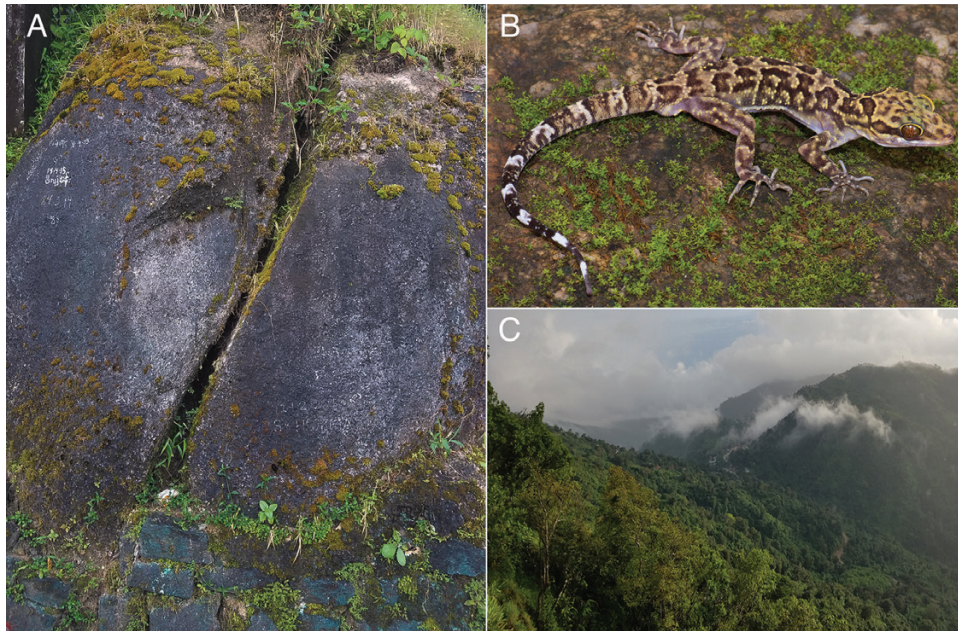

**Figure 38.** A, granite boulder microhabitat of *Cyrtodactylus aequalis* at the Golden Rock Pagoda on Mount Kyaiktiyo located on the Paung-laung ridge of the eastern Yoma Mountains, Mon State, Myanmar. B, adult male *C. aequalis* (LSUHC 12895) from Mount Kyaiktiyo. C, upland habitat of *C. aequalis* in the Yoma Mountains.

sp. nov. (maximum SVL = 91.6 mm) was only found inside the cave at least 100 m from the opening and the smaller *C. sadanensis* sp. nov. (maximum SVL = 73.8 mm) was abundant on the karst walls outside the cave. Additionally, these two species do not occur in the same species group, indicating that this karst system has been invaded multiple times.

TAXONOMIC COMMENTS ON *CYRTODACTYLUS*  
*AEQUALIS*, *C. FEA*E, *C. PEGUENSIS* AND *C.*  
*VARIEGATUS*

*CYRTODACTYLUS AEQUALIS* BAUER, 2003

*Type locality:* ‘Kyaik-Hti-Yo Wildlife Sanctuary, Kyaik Hto Township, Mon State, Myanmar (17°26’38.1”N, 97°05’56.8”E)’. Holotype: CAS 222185.

*Remarks:* The description of *Cyrtodactylus aequalis* was based on a single specimen that was purported to be an adult male in the ‘Holotype’ section of the description but in the ‘Description’ section it is referred to as an adult female (Bauer, 2003). Bauer (2003) noted that the femoral and precloacal pores were ‘minute’ which is characteristic of most females of *Cyrtodactylus*, whereas the 13 femoral and five precloacal pores in the adult male examined here (LSUHC 12895) are large and well-developed (Fig. 4A).

*Natural history:* Although not reported in the original description, the holotype was collected at 436 m in elevation alongside a mountain road that terminates at the Golden Rock pilgrimage site. The habitat at the collection site is degraded, secondary forest with outcroppings of large granite boulders. LSUHC 12895 was taken at the end of this road on Kyaiktiyo Hill in the Paung-laung ridge of the Eastern Yoma Mountains (N17°28.819, E97°05.974) at 1101 m at 1600 h. The specimen was found within a crack between two large granite boulders (Fig. 38). Although *C. aequalis* is part of the *sinyineensis* group that contains lowland, karst-adapted species, it is a granite dwelling species ranging from at least 436–1101 m above sea level. This would indicate that granite rock and not elevation is the limiting factor of its distribution. Being a relatively large species (maximum SVL = 90 mm; Bauer, 2003) nested within a species group composed of smaller (maximum SVL = 69.3–91.6 mm), karst-adapted species suggests that its use of granitic substrate is a microhabitat shift from karst to granite.

*CYRTODACTYLUS FEA*E (BOULENGER, 1893)

*Type locality:* ‘Puepoli, Karin Bia-po, elevation: 3200–3400 feet’ Kayah State, Myanmar. Holotype: in the Museo Civico di Storia Naturale di Genova, Genova, Italy. Catalogue number unknown.

*Remarks:* The specimen of ‘*Cyrtodactylus feae*’ (USNM 559805) from Popa Mountain, Mandalay Region in the phylogeny of Wood *et al.* (2012) and Agarwal *et al.* (2014) forms a monophyletic group with *C. annandalei* and *C. pyinyaungensis* sp. nov. (Fig. 10). However, USNM 559805 was misidentified (G. R. Zug, unpubl. data). *Cyrtodactylus feae* is known only from the type locality of Bia-po Keba, Karen-ni District, Kayah State (19°15N, 97°30E; Hallermann, 2006: 139) at 900–1000 m in elevation that is approximately 280 km to the south-east of Popa Mountain across the Ayerawaddy River Basin in a different mountain range. USNM 559805 was re-identified as *C. peguensis* (G. R. Zug, unpubl. data) although this identification too is questionable (see *C. peguensis* below).

The coloration and pattern of *C. shwetaungorum* sp. nov. is quite similar to the illustration of the holotype and only known specimen of *C. feae* (Boulenger 1893: Plate 7). However, *C. feae* has 32 continuous, femoropreloacal pores, whereas *C. shwetaungorum* sp. nov. has 23–28 and the SVL of *C. feae* is 47 mm (although it may be a juvenile) and that of *C. shwetaungorum* sp. nov. ranges up to 102.2 mm. The type locality of *C. feae* is 214 km south-west of that of *C. shwetaungorum* sp. nov. although their habitats may be continuous through a U-shape range of mountainous terrain. We hypothesize that the holotype of *C. feae* is a juvenile and that molecular data will place it within the *linnwayensis* group.

#### CYRTODACTYLUS PEGUENSIS (BOULENGER, 1893)

*Type locality:* “Palon”, Bago Region, Myanmar. Syntypes: BM 1946.8.23.10 and 1893.10.9.2.

*Remarks:* A disjunct, southern population of *Cyrtodactylus peguensis* has long been known to occur from various localities in Peninsular Thailand from immediately south of the Isthmus of Kra southward to central Trang Province (Laidlaw, 1901; Annandale, 1913; Smith, 1935; Taylor, 1963; Chan-ard, Parr & Nabhitabhata, 2015) and the specimens of *C. peguensis* in Wood *et al.* (2012), Agarwal *et al.* (2014) and here come from these southern regions. As first noted by Smith (1935), however, the southern populations differ markedly in squamation and colour pattern from the holotype from Palon, Pegu, Myanmar minimally 1000 km to the north-west and he questioned the validity of considering these disjunct populations as conspecific. We share Smith’s (1935) concern but until genetic data from the type locality of *C. peguensis* are available (which we just collected in May 2017), we consider the southern populations as *Cyrtodactylus cf. peguensis zebraicus* Taylor.

Based on the similarity of colour pattern and squamation of one of the syntypes of *C. peguensis* (see BM 1946.8.23.10; Fig. 13) we examined and compared to *C. pyinyaungensis* sp. nov., we hypothesize that *C. peguensis* from the type locality will be part of the Indo-Burmese clade and closely related to *C. pyinyaungensis* sp. nov., *C. annandalei* and the Popa Mountain population and not related to *C. cf. p. zebraicus* from Peninsular Thailand of the Indo-Chinese clade. Given the phylogenetic relationships and distribution of the former three species and the microendemism common in karst-adapted species, it is unlikely that the Popa Mountain population is not conspecific with *C. peguensis* from the type locality 300 km to the south from the Bago Yoma Range. We also hypothesize that *C. cf. p. zebraicus* of the Indo-Chinese clade is not conspecific with the widely allopatric *C. peguensis*.

#### CYRTODACTYLUS VARIEGATUS (BLYTH, 1859)

*Type locality:* ‘Moulmein [=Mawlamyine, Mon State]’. Holotype: ZSI 6188.

*Remarks:* Blyth (1859) ambiguously reported the type locality of *Cyrtodactylus variegatus* to be Moulmein (=Mawlamyine, Mon State). In reporting on a second specimen, Annandale (1913) noted that the type locality was probably inland from Mawlamyine in the Dawna Hills, approximately 75 km to the east in the Amherst District (=Mawlamyine District). Blyth’s (1859) description of the colour pattern of the holotype and the illustration of the second specimen in Annandale (1913: Plate 16)—which according to Smith (1935) ‘agrees well with Blyth’s description’—generally matches the colour pattern of *C. dammathetensis* sp. nov., *C. welpyanensis* sp. nov., *C. linnoensis* sp. nov., *C. sadanensis* sp. nov. and *C. yathepyanensis* sp. nov. although it is most similar to the former from Dammathet Cave, approximately 50 km to the west of the Dawna Hills. Like *C. variegatus*, the dorsal bands in *C. dammathetensis* sp. nov. are jagged and the nuchal loop has a tendency to be divided medially. It is clear from Blyth’s (1859) description of the holotype and more importantly from Smith’s (1935) more detailed redescription that the specimen is an adult male (SVL = 71 mm) with a ‘continuous series of 32 preanal and femoral [= femoropreloacal] pores’ (the key of Bauer [2003] erroneously reports *C. variegatus* as having only preloacal pores). Of the species in the Indo-Chinese clade, only *C. dammathetensis* sp. nov. has continuous femoropreloacal pores that number 45 in the holotype (LSUHC 12862)—much higher than that reported by Smith (1935). We hypothesize that molecular and additional morphological data will place *C. variegatus*

in the *sinyineensis* group. Preparations to survey the Dawna Hills are being made.

Cox *et al.* (1998) stated that *C. variegatus* inhabited caves in mountainous regions in northern and western Thailand but could give no specific locality as he did not work on these sections of the pocket guide in which these data are reported (M. J. Cox, unpubl. data). The data from this report were simply followed by Chanard *et al.* (2015). The photograph in Cox *et al.* (1998: 87) purported to be *C. variegatus* is actually *C. dum-niui* Bauer, Kunya, Sumontha, Niyomwan, Pauwels, Chanhme, & Kunya, likely from its only known locality in Chang Mai Province. Thus, to date, *C. variegatus* is possibly known only from the Dawna Hills.

## DISCUSSION

Agarwal *et al.* (2014) demonstrated that *Cyrtodactylus* ranging from regions west of the Shan Hills at the eastern edge of the Ayerawaddy River Basin to as far west as northern India, formed a clade of Indo-Burmese species that was the sister lineage to a clade of Southeast Asian species from east of the Salween River in eastern Myanmar. Results herein indicate the Southeast Asian clade contains a more exclusive Indo-Chinese clade that ranges from the newly sampled regions of east-central and southern Myanmar west of the Salween River through Peninsular Thailand to southern Vietnam. The Indo-Burmese and the Indo-Chinese clades are not sister lineages and are almost completely allopatric. This would indicate that the presence of these clades in Myanmar is the result of independent events. Agarwal *et al.* (2014) and Wood *et al.* (2012) posit that *Cyrtodactylus* radiated westward from upland regions north of the eastern Himalayas of India and Myanmar with one lineage crossing the Ayerawaddy and Salween River Basins in the Middle Eocene (~46–36 Myr) giving rise to the Southeast Asian clade. Given that the Indo-Chinese clade is one of the most recently derived lineages within the Southeast Asian clade (Fig. 9) and that Burmese taxa within this clade only occur east of the Ayerawaddy River Basin (Fig. 2), indicate that there were dispersal events back into eastern Myanmar beginning approximately 29 Myr as suggested by the BEAST analysis (Fig. 11). Given that the three, non-Burmese lineages of the Indo-Chinese clade all occur east of the Tenasserim Mountains and are the sister lineages to three different Burmese species groups would indicate at least three independent reinvasions into Myanmar occurred. The evolution of the *sinyineensis*, *yathepyanensis* and *sadanensis* groups happened within a relatively short period of time between approximately 10.5 and 6.5 Myr, whereas the formation of the *linnwayensis* group is more recent at approximately 3.9 Myr

(Fig. 11). Agarwal *et al.* (2014) inferred that their data indicated the Salween River and its associated alluvial plains lacking rocky habitats acted as a barrier to gene flow and that it was crossed only once in the Eocene. Our data are in general agreement but indicate that there are numerous isolated karst habitats throughout the Salween River Basin that are occupied by species of the *sinyineensis* and *yathepyanensis* groups that notably occur on both sides of the Salween River (Fig. 20), indicating that geckos could very well have occurred on both sides of the Salween River in the past, and that these habitat-islands could have facilitated dispersal in both directions across this basin.

The Indo-Chinese clade contains strong nodal support throughout much of the tree except for three nodes with very short branch lengths (Fig. 9). Such a topology with concomitant weak nodal support would suggest a rapid radiation and diversification at the initial formation of these clades. All the species groups of the Indo-Chinese clade formed between approximately 23.8 and 18.0 Mya (Fig. 11). This was followed by generally long periods of differentiation and a subsequent, relatively rapid burst of speciation between approximately 9.6 and 3.5 Mya, giving rise to all the known current species in each group (Fig. 11).

One of the most notable features concerning the new species described herein is the remarkable degree of microendemism within the species groups and the sympatry of species from different species groups within the same karst formation. Sister species such as *Cyrtodactylus pharbaungensis* sp. nov. and *C. san-pelensis* sp. nov. are found no farther apart than 16.5 km along the same waterway are separated by at least 9.4% sequence divergence, statistically significant mean differences in meristics, discrete differences in colour pattern, and occupy non-overlapping areas in morphospace (Fig. 12; Fig. S5; Tables 4, 9). If these populations were located even farther apart along a continuous range of suitable habitat (see Fig. 11), a strong argument for conspecificity could be made that their differences (including sequence divergences) could be attributed to sampling error. However, none of these criteria are met and at this juncture we believe the preponderance of data argues for a hypothesis considering them separate species. The reciprocally monophyletic sister species of the other species groups are even more divergent genetically and morphologically (Fig. 12; Fig. S5; Tables 5, 6, 9) and thus we favour their specific recognition as well.

The fact that *C. sinyineensis* sp. nov. and *C. sadanensis* sp. nov. occur in different species groups that are not sister lineages yet these two species occur in sympatry on the same karst hill, indicates separate colonization events and a high degree of niche partitioning. No *C. sinyineensis* sp. nov. were found outside the cave where *C. sadanensis* sp. nov. were abundant. In fact,

this phenomenon may be more prevalent than we record here. At many of the areas we visited, we could only survey during the day due to safety concerns and we do not know if additional species occur outside the caves at night. It is clear from the preliminary natural history data presented herein that these habitats need to be surveyed both day and night for multiple species.

It is tempting to try to piece together a biogeographical scenario to account for the distribution and evolution of the Burmese species; however, this would be premature as we believe there are too many missing data points (taxa). The isolated karst habitats to where we were guided for sampling were only a few surrounded by tens if not hundreds of others dotting the landscape within our line of sight. Given that nearly every isolated karst area we visited had at least one endemic species, we can only surmise that many more species have yet to be discovered. Furthermore, since these species do not form a single monophyletic group but instead form species groups most closely related to taxa farther west in Thailand, Cambodia and Vietnam, indicates that their evolutionary history is not the result of a single environmental event followed by a subsequent adaptive radiation. Rather their origins are the result of independent speciation events, each with their own separate history. Until more populations are sampled and more branches put on the tree, trying to infer those histories would be premature. Plans have been made for additional sampling and the use of genomic data to address these questions in the next round of analyses.

#### CONSERVATION

The high levels of biodiversity and site-endemism in limestone karst habitats rival that of many other habitats, yet karstic regions are rapidly becoming some of the most imperiled ecosystems in Southeast Asia (Clements *et al.*, 2006; Grismer *et al.*, 2016a; Luo *et al.*, 2016). Southeast Asia harbours more karst habitat than anywhere else in the world (Day & Urich, 2000) but unregulated and unsustainable quarrying practices continue to threaten the integrity of these landscapes and are the primary threat to the survival of karst-adapted species. This will no doubt amplify the ongoing biodiversity crisis in Southeast Asia whose overall rate of habitat loss is the highest among the world's tropical regions (Sodhi & Brook, 2006). A number of recent studies have shown that there are far more karst-associated vertebrates in Southeast Asia than previously reported (e.g. Luo *et al.*, 2016; Connette *et al.*, 2017) and the rate of discovery of new species of karst-adapted amphibians and reptiles shows no signs of levelling-off (see discussions in Grismer *et al.*, 2016a, b, c; Wood *et al.*, 2017). The report here of 11 new species of site-restricted, karst-adapted species

of *Cyrtodactylus* now moves the issues of conservation and management squarely into Myanmar whose karst ecosystems may be some of the most extensive and legally unprotected in all of Southeast Asia (Day & Urich, 2000). However, the situation in Myanmar may not be as dire as in other Southeast Asian nations. Many of the karst formations in which site-endemic species are located are religious retreats and protected places of worship that are occupied by Buddhist monasteries and guarded by vigilant monks (Grismer 2016). As such, they remain protected from the quarrying operations of industrial companies as well as commercial collecting.

Contrary to the premise of Connette *et al.*'s (2017) report that deforestation will threaten karst-adapted *Cyrtodactylus*, our data have shown that deforestation has little to no effect on the survival of any karst-adapted geckos. This is patently clear in Myanmar where the karst tower and hill localities of the 11 newly described species in Mon and Kayin States are completely surrounded by rice paddies. Elsewhere, *C. metropolis* Grismer, Wood, Chan, Anuar and Muin from the karst tower of Batu Caves in Peninsular Malaysia is completely surrounded by urbanization (Grismer *et al.*, 2014) and the small karst hill in Peninsular Malaysia wherein *C. hidupselamanya* Grismer, Wood, Anuar, Grismer, Quah, Murdoch, Muin, Davis, Aguilar, Klabacka, Cobos, Aowpho, and Sites is endemic is completely surrounded by oil palms (Grismer *et al.*, 2016b). Grismer (2011) noted additional examples in karst-adapted species of *Cnemaspis* Strauch and other species of *Cyrtodactylus* in Peninsular Malaysia. Connette *et al.* (2017) misquoted Grismer *et al.* (2016b) by stating Grismer *et al.* (2016b) indicated that oil palm plantations threatened karst-adapted species in Peninsular Malaysia when only quarrying operations were the identified threat. Therefore, if *C. payarhtanensis* and *C. lenya*—the new species described in Connette *et al.* (2017)—are site-specific karst-adapted endemics as they indicate, their claim that deforestation of the surrounding landscape will threaten their survival is likely to be untrue. The real danger here is that the broad-brush approach of 'save the rainforest' may not enhance the survival of karst-adapted geckos if karst formations are allowed to be quarried. One of us (L.L.G.) has visited sites in Sarawak, East Malaysia and elsewhere where roads have been cut through healthy intact forest specifically to access and quarry hidden karst formations. Protecting karst-adapted species requires a focused understanding of their microhabitat structure linked to a basic understanding of their natural history (e.g. Grismer *et al.*, 2014, 2016b) so that appropriate conservation measures can be conceived

KEY TO THE SPECIES OF *CYRTODACTYLUS* IN MYANMAR

|      |                                                                                                                    |                                   |
|------|--------------------------------------------------------------------------------------------------------------------|-----------------------------------|
| 1a.  | Deep preloacal (pubic) sulcus present .....                                                                        | <i>C. rubidus</i>                 |
| 1b.  | Preloacal sulcus present. ....                                                                                     | 2                                 |
| 2a.  | Enlarged pore-bearing post-preloacal scales in males .....                                                         | <i>C. chrysochylos</i>            |
| 2b.  | No enlarged post-preloacal pore-bearing scales .....                                                               | 3                                 |
| 3a.  | Ventral scales large, approximately equal in number to longitudinal rows of dorsal tubercles .....                 | <i>C. aequalis</i>                |
| 3b.  | Ventral scales small, exceed number of longitudinal rows of dorsal tubercles .....                                 | 4                                 |
| 4a.  | No preloacal or femoral pores in males .....                                                                       | 5                                 |
| 4b.  | Preloacal and/or femoral pores in males .....                                                                      | 6                                 |
| 5a.  | Light dorsal bands narrower and regularly shaped .....                                                             | <i>C. lenya</i>                   |
| 5b.  | Light dorsal bands jagged, zigzagged or composed of irregularly shaped markings .....                              | <i>C. payarhtansis</i>            |
| 6a.  | Males with preloacal pores only, no femoral pores .....                                                            | 7                                 |
| 6b.  | Males bearing femoral pores .....                                                                                  | 16                                |
| 7a.  | Femoral scales larger than surrounding scales .....                                                                | 8                                 |
| 7b.  | Femoral scales same size as surrounding scales .....                                                               | 13                                |
| 8a.  | Dark dorsum overlain with light markings .....                                                                     | 9                                 |
| 8b.  | Light dorsum overlain with dark markings.....                                                                      | 10                                |
| 9a.  | Light transverse dorsal bands; light reticulum on head .....                                                       | <i>C. feae</i>                    |
| 9b.  | Light markings composed of spots or lines arranged longitudinally; no light reticulum on head .....                | <i>oldhami</i>                    |
| 10a. | Dorsal pattern composed of large, round to elongate or hourglass-shaped dark markings .....                        | 11                                |
| 10b. | Thin dark dorsal bands edged with light colouring .....                                                            | 12                                |
| 11a. | 31–36 ventral scales .....                                                                                         | <i>C. pyinyaungensis</i> sp. nov. |
| 11b. | 43–45 ventral scales .....                                                                                         | <i>C. peguensis</i>               |
| 12a. | Top of head unicolour .....                                                                                        | <i>C. wakeorum</i>                |
| 12b. | Top of head bearing dark markings .....                                                                            | <i>C. consobrinoides</i>          |
| 13a. | Median subcaudal scales 2–3 times wider than long .....                                                            | <i>C. variegatus</i>              |
| 13b. | Median subcaudal scales not transversely enlarged .....                                                            | 14                                |
| 14a. | Digits short, subcaudal scales granular .....                                                                      | <i>C. brevidactylus</i>           |
| 14b. | Digits normal; subcaudal scales not granular .....                                                                 | 15                                |
| 15a. | Preloacal pore series in males acutely angled, recessed in a shallow groove; females bearing preloacal pores ..... | <i>C. gansi</i>                   |
| 15b. | Preloacal pore series more nearly straight, absent in females .....                                                | <i>C. ayerarwadyensis</i>         |
| 16a. | 34–41 enlarged femoral scales .....                                                                                | 17                                |
| 16b. | 14–23 enlarged femoral scales .....                                                                                | 18                                |
| 17a. | 13–15 longitudinal rows of dorsal tubercles .....                                                                  | <i>C. sadanensis</i> sp. nov.     |
| 17b. | 22 longitudinal rows of dorsal tubercles .....                                                                     | <i>C. russelli</i>                |
| 18a. | 8–16 femoral pores in males .....                                                                                  | <i>C. sanpelensis</i> sp. nov.    |
| 18b. | 20–22 femoral pores in males .....                                                                                 | 19                                |
| 19a. | 43 rows of ventral scales .....                                                                                    | <i>C. annandalei</i>              |
| 19b. | 27–34 rows of ventral scales .....                                                                                 | 20                                |
| 20a. | 12–14 preloacal pores in males .....                                                                               | <i>C. sadansinensis</i> sp. nov.  |
| 20b. | 6–10 preloacal pores in males .....                                                                                | 21                                |
| 21a. | Maximum SVL > 100 mm .....                                                                                         | 22                                |
| 21b. | Maximum SVL < 100 mm .....                                                                                         | 24                                |
| 22a. | 18–21 longitudinal rows of dorsal scales; fully regenerated tail not spotted .....                                 | 23                                |
| 22b. | 13–18 longitudinal rows of dorsal scales; fully regenerated tail spotted .....                                     | <i>C. linnwayensis</i> sp. nov.   |
| 23a. | Dorsal pattern consisting of wide, dark bands .....                                                                | <i>C. shwetaungorum</i> sp. nov.  |
| 23b. | Dorsal pattern consisting of dark, paravertebral markings .....                                                    | <i>C. slowinskii</i>              |
| 24a. | Enlarged proximal femoral scales ~1/2 size or smaller than of distal femorals .....                                | 25                                |
| 24b. | Enlarged proximal femoral scales same size as distal femorals .....                                                | 27                                |
| 25a. | Maximum SVL > 90 mm .....                                                                                          | 26                                |
| 25b. | Maximum SVL < 90 mm .....                                                                                          | 27                                |

|                                             |                                   |
|---------------------------------------------|-----------------------------------|
| 26a. 27–29 ventral scales .....             | <i>C. sinyineensis</i> sp. nov.   |
| 26b. 37 ventral scales .....                | <i>C. tamaiensis</i>              |
| 27a. 25–30 ventral scales .....             | 28                                |
| 27b. 30–38 ventral scales .....             | 29                                |
| 28a. 36 femoral pores in males .....        | <i>C. dammthetensis</i> sp. nov.  |
| 28b. 20 femoral pores in males .....        | <i>C. welpyanensis</i> sp. nov.   |
| 29a. Dorsal bands jagged .....              | <i>C. linnoensis</i> sp. nov.     |
| 29b. Dorsal bands straight or regular ..... | 30                                |
| 30a. 30–32 ventral scale rows .....         | <i>C. yathepyanensis</i> sp. nov. |
| 30b. 34–38 ventral scale rows .....         | <i>C. pharbaungensis</i> sp. nov. |

and put into place to specifically protect the karst habitats.

### ACKNOWLEDGEMENTS

We wish to thank the Apache Cement Company for sponsoring our surveys in the Mandalay Region; Dr Sai Sein Lin Oo for help with locating type localities; our guide Aung Naing for excellent help with logistics, safety and collecting; and the monks of the Linn-Way Monastery for providing us shelter and a place to sleep. We also wish to thank Mr Win Naing Thaw of the Ministry of Natural Resources and Environmental Conservation Forest Department for the collection and export permits. L.L.G. thanks the College of Arts and Sciences of La Sierra University and Fauna & Flora International for partial funding. Fieldwork for P.L.W.J. was supported the Monte L. Bean Life Science Museum at Brigham Young University and generation of molecular data was supported by the NSF grant EF-1241885 issued to Jack W. Sites.

### REFERENCES

- Agarwal I, Bauer AM, Jackman TR, Karanth KP. 2014.** Insights into Himalayan biogeography from geckos: a molecular phylogeny of *Cyrtodactylus* (Squamata: Gekkonidae). *Molecular Phylogenetics and Evolution* **80**: 145–155.
- Annandale N. 1913.** The Indian geckos of the genus *Gymnodactylus*. *Records of the Indian Museum* **9**: 309–326.
- Bauer AM. 2002.** Two new species of *Cyrtodactylus* (Squamata: Gekkonidae) from Myanmar. *Proceedings of the California Academy of Sciences* **53**: 73–86.
- Bauer AM. 2003.** Descriptions of seven new *Cyrtodactylus* (Squamata: Gekkonidae) with a key to the species of Myanmar (Burma). *Proceedings of the California Academy of Sciences* **54**: 463–498.
- Blyth E. 1859.** Report of the Curator, Zoological Department. *Proceedings of the Asiatic Society* **28**: 279.
- Boulenger GA. 1893.** Concluding report on the reptiles and batrachians obtained in Burma by Signor L. Fea, dealing with the collection made in Pegu and the Karin Hills in 1887–88. *Annali del Museo civico di storia naturale di Genova* **2**: 304–345.
- Brandley MC, Wang Y, Guo X, Nieto Montes de Oca A, Feria Ortiz M, Hikida T, Ota H. 2011.** Accommodating locus-specific heterogeneity in molecular dating methods: an example using inter-continental dispersal of Plestiodon (Eumeces) lizards. *Systematic Biology* **60**: 3–15.
- Carranza S, Arnold EN, Mateo J, Lopez-Jurado L. 2000.** Long-distance colonization and radiation in gekkonid lizards, *Tarentola* (Reptilia: Gekkonidae), revealed by mitochondrial DNA sequences. *Proceedings of the Royal Society B: Biological Sciences* **267**: 637–649.
- Chan-ard T, Parr JWK, Nabhitabhata J. 2015.** *A field guide to the reptiles of Thailand*. New York: Oxford University Press.
- Clements R, Sodhi NS, Schilthuizen M, Ng PKL. 2006.** Limestone karsts of Southeast Asia: imperiled arls of biodiversity. *BioScience* **56**: 733–742.
- Connette GM, Oswald P, Thura MK, Connette KJL, Grindley ME, Songer M, Zug GR, Mulchay DG. 2017.** Rapid forest clearing in a Myanmar proposed national park threatens two newly discovered species of geckos (Gekkonidae: *Cyrtodactylus*). *PLoS One* **12**: e0174432.
- Cox MJ, van Dijk PP, Nabhitabhata J, Thirakhupt J. 1998.** *A photographic guide to snakes and other reptiles of Peninsular Malaysia, Singapore and Thailand*. London: New Holland Publishers (UK) Ltd.
- Day M, Urich P. 2000.** An assessment of protected karst landscapes in Southeast Asia. *Cabe and Karst Science* **27**: 61–70.
- Drummond AJ, Suchard MA, Xie D, Rambaut A. 2012.** Bayesian phylogenetics with BEAUti and the BEAST 1.7. *Molecular Biology and Evolution* **29**: 1969–1973.
- Frost DR. 2016.** *Amphibian species of the world: an online reference. Version 6.0* (19 January 2017). New York: American Museum of Natural History. Available at: <http://research.amnh.org/herpetology/amphibia/index.html>
- Gray JE. 1825.** A synopsis of the genera of reptiles and Amphibia, with a description of some new species. *Annals of Philosophy, New Series* **10**: 193–217.
- Gray JE. 1827.** A synopsis of the genera of saurian reptiles, in which some new genera are indicated, and the others reviewed by actual examination. *The Philosophical*

- Magazine, or Annals of Chemistry, Mathematics, Astronomy, Natural History, and General Science* **2**: 54–58.
- Grismer LL. 2011.** *Lizards of Peninsular Malaysia, Singapore, and their adjacent Archipelagos*. Frankfurt am Main: Edition Chimaira.
- Grismer LL. 2016.** *Summary report of the herpetological survey of limestone habitats in Mon, Kayin, and Shan States and the Mandalay region during 1–20 October 2016*. Unpublished report to Fauna & Flora International.
- Grismer LL, Grismer JL. 2017.** A re-evaluation of the phylogenetic relationships of the *Cyrtodactylus condorensis* group (Squamata; Gekkonidae) and a suggested protocol for the characterization of rock-dwelling ecomorphology. *Zootaxa* **4300**: 486–504.
- Grismer LL, Norhayati A. 2008.** A new insular species of *Cyrtodactylus* (Squamata: Gekkonidae) from the Langkawi Archipelago, Kedah, Peninsular Malaysia. *Zootaxa* **1924**: 53–68.
- Grismer LL, Wood PL, Anuar S, Davis HR, Cobos AJ, Murdoch ML. 2016a.** A new species of karst forest bent-toed gecko (genus *Cyrtodactylus* Gray) not yet threatened by foreign cement companies and a summary of Peninsular Malaysia's endemic karst forest herpetofauna and the need for its conservation. *Zootaxa* **4061**: 1–17.
- Grismer LL, Wood PL Jr., Anuar S, Grismer MS, Quah ESH, Murdoch ML, Muin MA, Davis HR, Aguilar C, Klabacka R, Cobos AJ, Aowphol A, Sites J Jr. 2016b.** Two new bent-toed geckos of the *Cyrtodactylus pulchellus* complex from Peninsular Malaysia and multiple instances of convergent adaptation to limestone forest ecosystems. *Zootaxa* **4105**: 401–429.
- Grismer LL, Wood PL Jr., Anuar S, Quah ESH, Muin MA, Chan KO, Sumarli AX, Loredo AI. 2015a.** Repeated evolution of sympatric, paleoendemic species in closely related, co-distributed lineages of *Hemiphyllodactylus* Bleeker, 1860 (Squamata: Gekkonidae) across a sky-island archipelago in Peninsular Malaysia. *Zoological Journal of the Linnean Society* **174**: 859–876.
- Grismer LL, Wood PL Jr., Aowphol A, Cota M, Grismer MS, Murdoch ML, Aguilar C, Grismer JL. 2016c.** Out of Borneo: biogeography of the Stream Toad genus *Ansonia* Stoliczka (Anura: Bufonidae) and the discovery of the first limestone cave dwelling species. *Biological Journal of the Linnean Society*. doi:10.1111/bj.12886.
- Grismer LL, Wood PL Jr., Onn CK, Anuar S, Muin MA. 2014.** Cyrtos in the city: a new bent-toed gecko (genus *Cyrtodactylus*) is the only endemic species of vertebrate from Batu Caves, Selangor, Peninsular Malaysia. *Zootaxa* **3774**: 381–394.
- Grismer LL, Wood PL Jr., Quah ESH, Anuar S, Muin MA, Sumontha M, Norhayati A, Bauer AM, Wangkulangkul S, Grismer JL, Pauwels OSG. 2012.** A phylogeny and taxonomy of the Thai-Malay Peninsula bent-toed geckos of the *Cyrtodactylus pulchellus* complex (Squamata: Gekkonidae): combined morphological and molecular analyses with descriptions of seven new species. *Zootaxa* **3520**: 1–55.
- Grismer LL, Wood PL Jr., Thura MK, Zin T, Quah ESH, Murdoch ML, Grismer MS, Lin A, Kyaw H, Ngwe L. 2017.** Phylogenetic taxonomy of *Hemiphyllodactylus* Bleeker, 1860 (Squamata: Gekkonidae) with descriptions of three new species from Myanmar. *Journal of Natural History*. In press.
- Grismer LL, Wood PL, Tri NV, Murdoch ML. 2015b.** The systematics and independent evolution of cave ecomorphology in distantly related clades of bent-toed geckos (genus *Cyrtodactylus* Gray, 1827) from the Mekong Delta and islands in the Gulf of Thailand. *Zootaxa* **3980**: 106–126.
- Hallermann J. 2006.** Additions to the catalogue of the type specimens of the herpetological collection in the Zoological Museum of the University of Hamburg. *Mitteilungen aus dem Hamburgischen Zoologischen Museum und Institut* **103**: 137–147.
- Heinicke MP, Greenbaum E, Jackman TR, Bauer AM. 2011.** Phylogeny of a trans-Wallacean radiation (Squamata, Gekkonidae, *Gehyra*) supports a single early colonization of Australia. *Zoologica Scripta* **40**: 584–602.
- Huelsenbeck JP, Ronquist F, Nielsen R, Bollback JP. 2001.** Bayesian inference of phylogeny and its impact on evolutionary biology. *Science (New York, N.Y.)* **294**: 2310–2314.
- Jombart T, Devillard S, Balloux F. 2010.** Discriminant analysis of principal components: a new method for the analysis of genetically structured populations. *BMC Genetics* **11**: 94.
- Kaiser HF. 1960.** The application of electronic computers to factor analysis. *Education and Psychological Measurement* **20**: 141–151.
- Kearse M, Moir R, Wilson A, Stones-Havas S, Cheung M, Sturrock S, Buxton S, Cooper A, Markowitz S, Duran C, Thierer T, Ashton B, Meintjes P, Drummond A. 2012.** Geneious Basic: an integrated and extendable desktop software platform for the organization and analysis of sequence data. *Bioinformatics (Oxford, England)* **28**: 1647–1649.
- Kumar S, Stecher G, Tamura K. 2016.** MEGA7: molecular evolutionary genetics analysis version 7.0 for bigger datasets. *Molecular Biology and Evolution* **33**: 1870–1874. doi:10.1093/molbev/msw054.
- Laidlaw FF. 1901.** On a collection of lizards from the Malay Peninsula, made by members of the “Skeat Expedition,” 1899–1900. *Proceedings of the Zoological Society of London* **1901**: 301–311.
- Luo Z, Tang S, Jiang Z, Chen J, Fang H, Li C. 2016.** Conservation of terrestrial vertebrates in a global hotspot of karst in southwestern China. *Scientific Reports*. doi:10.1038/srep25717.
- Macey JR, Larson A, Ananjeva NB, Fang Z, Papenfuss TJ. 1997.** Two novel gene orders and the role of light-strand replication in rearrangement of the vertebrate mitochondrial genome. *Molecular Biology and Evolution* **14**: 91–104.
- Maddison WP, Maddison DR. 2015.** Mesquite: a modular system for evolutionary analysis. *Version 3.04*. Available at: <http://mesquiteproject.org>
- Mahony S. 2009.** Taxonomic status of *Cyrtodactylus khasiensis tamaiensis* (Smith, 1940) and description of a new species allied to *C. chrysopylos* Bauer, 2003 from Myanmar (Retilia: Gekkonidae). *Hamadryad* **34**: 62–74.
- Miller MA, Pfeiffer W, Schwartz T. 2010.** Creating the CIPRES Science Gateway for inference of large phylogenetic trees. In: *Proceedings of the Gateway Computing*



- Environments Workshop (GCE), 14 November 2010, New Orleans, LA, 1–8.
- Minh Q, Nguyen MAT, von Haeseler A. 2013.** Ultrafast approximation for phylogenetic bootstrap. *Molecular Biology and Evolution* **30**: 1188–1195.
- Ngo VT, Grismer LL, Grismer JL. 2008.** A new cave dwelling species of *Cyrtodactylus* Gray, 1827 (Squamata: Gekkonidae) in Kien Giang Biosphere Reserve, southwestern Vietnam. *Zootaxa* **1967**: 53–62.
- Ngo VT, Grismer LL, Grismer JL. 2010.** A new species of *Cyrtodactylus* Gray, 1827 (Squamata: Gekkonidae) in Phu Quoc National Park, Kien Giang Biosphere Reserve, southwestern Vietnam. *Zootaxa* **2604**: 37–51.
- Nguyen LT, Schmidt HA, von Haeseler A, Minh BQ. 2015.** IQ-TREE: a fast and effective stochastic algorithm for estimating maximum-likelihood phylogenies. *Molecular Biology and Evolution* **32**: 268–274.
- Nosil P. 2012.** *Ecological speciation*. New York: Oxford University Press.
- Oppel M. 1811.** Mémoire sur la classification des reptiles. Ordre II. Reptiles à écailles. Section II. Ophidiens. *Annales du Musée National d'Histoire Naturelle, Paris* **16**: 254–295, 376–393.
- Panitvong N, Sumontha M, Tunprasert J, Pauwel OS. 2014.** *Cyrtodactylus saiyok* sp. nov., a new dry evergreen forest-dwelling bent-toed gecko (Squamata: Gekkonidae) from Kanchanaburi Province, western Thailand. *Zootaxa* **3869**: 64–74. Pauwels OSG, Bauer AM, Sumontha M, Chanhome L. 2004. *Cyrtodactylus thirakhupti* (Squamata: Gekkonidae), a new cave-dwelling gecko from southern Thailand. *Zootaxa* **772**: 1–11. Price L. 2014. *Caves and Karst of Peninsular Malaysia. A register, 2nd edn*. Berlin: Berliner, Höhlenkundliche.
- R Core Team 2015.** *R: A language and environment for statistical computing*. R Foundation for Statistical Computing. Vienna, Australia. Available at: <http://www.R-project.org>.
- Rambaut A, Drummond AJ. 2013.** TreeAnnotator v1.8.0 MCMC output analysis. Available at: <http://beast.bio.ed.ac.uk/TreeAnnotator>
- Rambaut A, Suchard MA, Xie D, Drummond AJ. 2014.** *Tracer v1.6*. Available at: <http://beast.bio.ed.ac.uk/Tracer>
- Ronquist F, Teslenko M, van der Mark P, Ayres DL, Darling A, Höhna S, Larget B, Liu L, Suchard MA, Huelsenbeck JP. 2012.** MrBayes 3.2: efficient Bayesian phylogenetic inference and model choice across a large model space. *Systematic Biology* **61**: 539–542.
- Rundle HD, Nosil P. 2005.** Ecological speciation. *Ecology Letters* **8**: 336–352.
- Schluter D. 2001.** Ecology and the origin of species. *Trends In Ecology & Evolution* **16**: 372–380.
- Siler CD, Oaks JR, Esselstyn JA, Diesmos AC, Brown RM. 2010.** Phylogeny and biogeography of Philippine bent-toed geckos (Gekkonidae: *Cyrtodactylus*) contradict a prevailing model of Pleistocene diversification. *Molecular Phylogenetics and Evolution* **55**: 699–710.
- Smith MA. 1935.** *Fauna of British India, including Ceylon and Burma. Reptilia and Amphibia. Vol. II Sauria*. London: Taylor & Francis Ltd.
- Sodhi NS, Brook BW. 2006.** *Southeast Asian biodiversity in crisis*. Cambridge (United Kingdom): Cambridge University Press.
- Taylor EH. 1963.** The lizards of Thailand. *University of Kansas Science Bulletin* **44**: 687–1077.
- Uetz P, Freed P, Hosek J. 2016.** *The reptile database*. Available at: <http://www.reptile-database.org>
- Wilcox TP, Zwickl DJ, Heath TA, Hillis DM. 2002.** Phylogenetic relationships of the Dwarf Boas and a comparison of Bayesian and bootstrap measures of phylogenetic support. *Molecular Phylogenetics and Evolution* **25**: 361–371.
- Wood PL Jr., Grismer LL, Aowphol A, Aguilar CA, Cota M, Grismer MS, Murdoch ML, Sites JW Jr. 2017.** Three new karst-dwelling *Cnemaspis* Strauch, 1887 (Squamata: Gekkonidae) from Peninsular Thailand and the phylogenetic placement of *C. punctatouuchalis* and *C. vandeventeri*. *PeerJ* **5**: e2884.
- Wood PL Jr., Heinicke MP, Jackman TR, Bauer AM. 2012.** Phylogeny of bent-toed geckos (*Cyrtodactylus*) reveals a west to east pattern of diversification. *Molecular Phylogenetics and Evolution* **65**: 992–1003.
- Zamudio KR, Jones KB, Ward RH. 1997.** Molecular systematics of short-horned lizards: biogeography and taxonomy of a widespread species complex. *Systematic Biology* **46**: 284–305.

## SUPPORTING INFORMATION

Additional Supporting Information may be found in the online version of this article at the publisher's web-site:

**Figure S1.** Type series of *Cyrtodactylus pyinyaungensis* sp. nov. LSUHC 13147–50 from 5.7 km north of Pyinyaung Village at the Apache Cement factory mining site, Mandalay Region, Myanmar. LSUHC 12939 = BYU 52234 from 5.3 km north of Pyinyaung Village at the Apache Cement factory mining site, Mandalay Region, Myanmar.

**Figure S2.** Type series of *Cyrtodactylus linnwayensis* sp. nov. from Yum Twing Gyi, Yae Htwat and Lay Htwat caves, Linn-Way Village, 12.7 km north-east of Ywangan, Taunggyi District, Shan State, Myanmar. Upper row illustrates the colour pattern morph with wide, more irregularly shaped, dorsal bands and the lower row illustrates the morph with more narrow, even (straight-edged), dorsal bands. LSUHC 12982 and 12985 = BYU 52213–14, respectively.

**Figure S3.** Type series of *Cyrtodactylus shwetaungorum* sp. nov. from 5.0 and 5.3 km north of Pyinyaung Village at the Apache Cement factory mining site, Mandalay Region, Myanmar. LSUHC 12899, 12936 and 12938 = BYU 52225–27, respectively.

**Figure S4.** Type series of *Cyrtodactylus sadansinensis* sp. nov. from Sadan Sin Cave, 10.5 km north-west of Mawlamyine, Mawlamyine District, Mon State, Myanmar. LSUHC 12854 = BYU 52220.

**Figure S5.** Discriminant analyses of principle components (DAPC) of the species of the *sadansinensis* species group, *yathepyanensis* species group and *sinyineensis* species group showing complete separation of all species.

**Figure S6.** Type series of *Cyrtodactylus pharbaungensis* sp. nov. from Pharbaung Cave, 38.4 km south-east of Mawlamyine, Mawlamyine District, Mon State, Myanmar. LSUHC 12872 = BYU 52215.

**Figure S7.** Type series of *Cyrtodactylus sanpelensis* sp. nov. from Sanpel Cave, 21.3 km south-east of Mawlamyine, Mawlamyine District, Mon State, Myanmar. LSUHC 12876, 12882, 12884 and 12888 = BYU 52221–24, respectively.

**Figure S8.** Type series of *Cyrtodactylus dammathethensis* sp. nov. from Dammathet Cave, 38.4 km south-east of Mawlamyine, Mawlamyine District, Mon State, Myanmar.

**Figure S9.** Type series of *Cyrtodactylus sinyineensis* sp. nov. from Sin Yine Cave, 18.5 km south-east of Hpa-an, Hpa-an District, Kayin State, Myanmar.

**Figure S10.** Type series of *Cyrtodactylus welpyanensis* sp. nov. from Welpyan Cave, 35 km north of Hpa-an, Hpa-an District, Kayin State, Myanmar.

**Figure S11.** Type series of *Cyrtodactylus yathepyanensis* sp. nov. from the type locality of Yathe Pyan Cave, 9 km south-west of Hpa-an, Hpa-an District, Kayin State, Myanmar. LSUHC 12819–20 = BYU 52228–29, respectively.

**Figure S12.** Type series of *Cyrtodactylus linnoensis* sp. nov. from the type locality of Linno Cave region, 5 km south-west of Hpa-an, Hpa-an District, Kayin State, Myanmar. LUSHC 12827–28 and 12830–31 = BYU 52230–33, respectively.

**Figure S13.** Type series of *Cyrtodactylus sadanensis* sp. nov. from Sadan Cave, 17 km south-east of Hpa-an, Hpa-an District, Kayin State, Myanmar. LSUHC 12838, 12840, 12850–51 = BYU 52216–19, respectively.

**Table S1.** Summary statistics and principal component analysis scores for the species of the *linnwayensis* group. Abbreviations are listed in the Material and Methods.

**Table S2.** Summary statistics and principal component analysis scores for the species of the *sadansineensis* group.

**Table S3.** Summary statistics and principal component analysis scores for the species of the *sinyineensis* group.

**Table S4.** Summary statistics and principal component analysis scores for the species of the *yathepyanensis* group. Abbreviations are listed in the Material and Methods.
